# Supplementary material
Source: HighWire-hosted journal article supplement (doi:10.1101/rna.032243.112)
Supplement: Martinez_Supplemental_Figs.pdf [file Martinez_Supplemental_Figs.pdf]

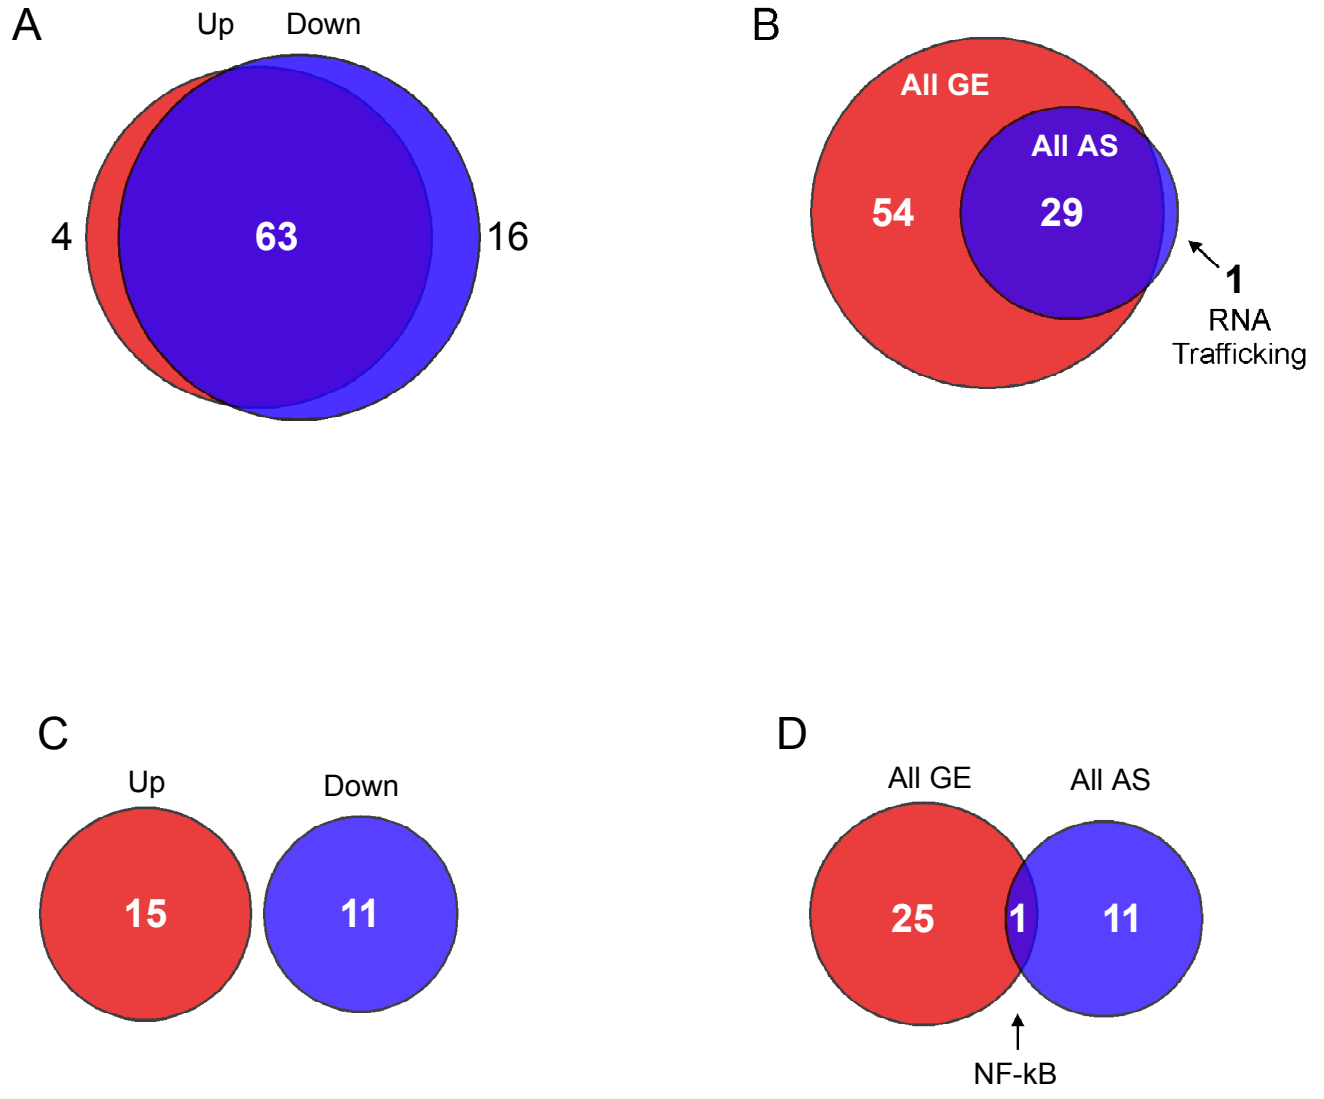

**Supplemental Figure 1: Comparison of IPA analysis of gene expression (GE) changes upon stimulation of JSL1 cells.** (A) Functional categories enriched in genes up-regulated (red) vs. down-regulated (blue) upon stimulation. (B) Functional categories enriched in all genes that change expression (GE, red) vs. splicing (AS, blue). (C) Signaling pathways enriched in genes up-regulated (red) vs. down-regulated (blue) upon stimulation. (D) Signaling pathways enriched in all genes that change expression (GE, red) vs. splicing (AS, blue). See supplemental table 5 for further detail.

**Category I****Motif 1**

| Name             | Strand | Start | p-value  | Sites                                  |
|------------------|--------|-------|----------|----------------------------------------|
| EHMT2upstream    | +      | 13    | 1.85e-08 | CGGCGCAAGC GGGAGCCTCCGCGGG CCAAGGAGCC  |
| SIGIRRdownstream | +      | 14    | 1.39e-07 | GAGCAGGCCGC GGGAGGGTCCGGGGC TAGCGGCGGG |
| SIGIRRdownstream | +      | 83    | 6.28e-07 | ACCCCTCCGT GGGGAGCTCTGCGGC ACCACGCTTT  |
| EHMT2upstream    | +      | 46    | 1.27e-06 | CCACGAGGTG AGGAGGCTCTGCTGC TTTTGGGTGC  |
| SIGIRRdownstream | +      | 124   | 1.39e-06 | GGGCCCTGGG GGGAGGTTCCGCTGC CTGGGGCCCC  |
| EHMT2downstream  | +      | 21    | 1.15e-05 | TGCCGGGACA GGGAGCCACTAGGGG GCGACCTCAG  |
| SIGIRRupstream   | +      | 143   | 2.08e-05 | TGGGTCCCGC GCGGGGTTGGGTGGG CCCCAGCGTA  |

**Motif 2**

| Name               | Strand | Start | p-value  | Sites                              |
|--------------------|--------|-------|----------|------------------------------------|
| BRD8downstream     | +      | 171   | 2.50e-07 | TCTTTCTGCA TGTGTGTGTGT GTGTGGGCTG  |
| MAP2K7downstream   | +      | 92    | 7.49e-07 | GCCCCATGC TCTGTGTGTGT CCCCATGTCC   |
| BRD8upstream       | +      | 118   | 3.28e-06 | GTGTGGTGCT TGTGTCTGTGT CCTGAGGTTT  |
| MAP2K7upstream     | +      | 12    | 5.84e-06 | TCCAGGCGTC TCTGTCTGTGT CAACTCCATC  |
| PTPRC-E4upstream   | +      | 4     | 5.84e-06 | CATA TATGTGTATGT ATATTTATGA        |
| EHMT2upstream      | +      | 184   | 6.68e-06 | TCTCACTCTC TCTGTCTGTGT GTCA        |
| PTPRC-E6upstream   | +      | 121   | 1.32e-05 | CTTTAGTAAT TGTGTTTATGT TGGCTATCTG  |
| PTPRC-E4upstream   | +      | 70    | 1.69e-05 | GGTGTGTGCA TATGTATGTGT AGATATATGT  |
| BRD8upstream       | +      | 103   | 2.45e-05 | ATTTTGTCTT TGTGTGTGTGG TGCTTGTGTC  |
| ZC3H14upstream     | +      | 153   | 3.61e-05 | ACATGCTGGT ATTGTCTGTGT TGTAAGCTTA  |
| BRD8upstream       | +      | 21    | 3.61e-05 | TTGGGGACCA TCAGTTTCTGT GCTAGAGGCG  |
| PTPRC-E4downstream | +      | 139   | 4.82e-05 | TTGCAGGAAA TTAGTATCTGT GAAATATAGA  |
| BRD8upstream       | +      | 175   | 5.89e-05 | TGGAACCTGA TCAGTGTGTTGT TTGTCCTCTA |
| SEC16A-E2upstream  | +      | 173   | 6.07e-05 | TCGTCCGTGT TTTATGTGTGT TCTTGCTGTT  |
| BRD8upstream       | +      | 155   | 7.04e-05 | CTTGTGGCTG AGAGTTTCTGT GGAACCTGAT  |

**Category II****Motif  
1**

| Name              | Strand | Start | p-value  | Sites                                 |
|-------------------|--------|-------|----------|---------------------------------------|
| TRIM26Lupstream   | +      | 131   | 1.12e-08 | AGTAAAGGGA GTGGGGGTGGAGTGG GTCATCTCTG |
| TRIM26Ldownstream | +      | 62    | 3.57e-07 | AATTGTGTAT GGGGAAGGGGAGCGG TTATTCTGGT |
| LCKLupstream      | +      | 31    | 7.60e-07 | ATTCCCCGCA GTGGGTGAGGTGTGG AACCTGACCC |
| LCKLupstream      | +      | 131   | 1.20e-06 | GCTTGGAGAA GTGGGGGAGGTGGTG TCAATACGAG |
| LCKLdownstream    | +      | 32    | 2.90e-06 | CCTGGGAAGA GGGGAACGGGAGGGG CCGCTGAGGT |
| MAP4K2Lupstream   | +      | 135   | 2.90e-06 | GGCTGCGCCT GGGGCGGAGGGGTAG GGGCCACAGA |
| PYK2Ldownstream   | +      | 45    | 5.40e-06 | TGAGGAGGCT GCTGGAGGGAGGTGG CCGGGGACAC |
| LCKLdownstream    | +      | 140   | 2.06e-05 | GCACACGAAG GTGGCGGTGAAGAGC CTGAAGCAGG |

**Motif  
2**

| Name              | Strand | Start | p-value  | Sites                                  |
|-------------------|--------|-------|----------|----------------------------------------|
| CUGBP2Lupstream   | +      | 61    | 2.45e-07 | GAGAGAGAAG TTGTTTTATTTTTAT GTACTACTGA  |
| LEF1Lupstream     | +      | 163   | 5.70e-07 | CTATTTTGCT TACTTTTGTTTTTTT CTTCCTCCT   |
| CUGBP2Ldownstream | +      | 18    | 8.46e-07 | CATCTGCCCT TTCTTTGTTTTCTTT GTGCAAATGA  |
| LUC7Ldownstream   | +      | 38    | 1.53e-06 | TAACAAAAA GTGTTTGCTTTTTTT CACAAGTAAC   |
| CUGBP2Lupstream   | +      | 156   | 1.89e-06 | TTTTGTCTTG TTGTTTTTTGTCTTT CCTGCTCCCT  |
| LEF1Ldownstream   | +      | 172   | 2.61e-06 | AGCTTCGAGC TATCTTTTTTTTTTT GCTATGGGTG  |
| LEF1Lupstream     | +      | 119   | 3.44e-06 | AATATTTTCA TTTTTTGATTTTTGA AACATAAAAT  |
| TRIM26Lupstream   | +      | 156   | 7.30e-06 | GTCATCTCTG AGGTTTTTTTTTTTTT GGCTCTGATT |
| LUC7Lupstream     | +      | 103   | 1.00e-05 | AAGTGCTTTT TAGCTTTCTTTGTAT ATTGAGTTGC  |
| LUC7Lupstream     | +      | 145   | 1.08e-05 | TTGCTTCCCA TATTTTTATTTATA CAAACTGAAC   |
| TRIM26Lupstream   | +      | 177   | 1.36e-05 | TTTTGGCTCT GATTTTGGTTTCTGT CTGCCCA     |
| PYK2Lupstream     | +      | 178   | 2.19e-05 | TGCCTTGTGC TTCTTTGCTTTTCTT GAATAG      |
| PYK2Lupstream     | +      | 54    | 2.49e-05 | AAGGCCACG TTTTGTCTTTATTA ACTCCTGGAG    |
| AKAP9Ldownstream  | +      | 82    | 3.25e-05 | TTTTCTTGCA TGTACTTCTTTCTGT GTGTGATTC   |

**Category III**

| Name            | Strand | Start | p-value  | Sites                                                          |
|-----------------|--------|-------|----------|----------------------------------------------------------------|
| PIGQupstream    | +      | 63    | 4.36e-16 | GCGACGGAGG GGGCGGGGAGAGCTTCGTGGGTGGCCACGGCCAGCAGCAC CCGGGTGCCC |
| PIGQupstream    | +      | 9     | 1.11e-12 | GCCTGGCTG CAGGAGGCTTTGATGCCGGCCTGGCAGCCAGCTCCAGGAG TTGGGCGACG  |
| PIGQdownstream  | +      | 60    | 9.20e-12 | ACGGTGGGGT CAGCTGGGTGTAGTGTCTGGGTGGCACCACGCCAGCCTGC GATGAGGTAC |
| H2AFYdownstream | +      | 10    | 2.40e-10 | TAATGCCTAG CCGGGTGTGCGGAGTGTGTGTGTCATGGTCAGTCGGCC GCTGCAGACA   |
