# Supplementary material
Source: HighWire-hosted journal article supplement (doi:10.1101/rna.032243.112)
Supplement: SuppLegends.docx [file SuppLegends.docx]

**Supplemental Table 1. Prediction of alternative splicing by RNA-Seq.**

Complete data from the RNA-Seq alternative splicing analysis pipeline, comprising all ~ 11,000 exons for which greater than 10 exon-junction reads were obtained. Gene names highlighted in bold indicate those AS events which have been validated by RT-PCR. Gene names highlighted in grey indicate those AS events which were analyzed by RT-PCR and found to be inconsistent with the RNA-Seq prediction.

**Supplemental Table 2. RT-PCR analysis of exons predicted NOT to change in inclusion value between resting and stimulated JSL1 cells.** (n> 3 for all data)

**Supplemental Table 3. Prediction of gene expression differences by RNA-Seq.**

Complete data from the RNA-Seq pipeline, comprising the complete set of 10,374 genes with 10 or more reads per 50 basepairs under either resting or stimulated conditions. Shown are reads per kilobase of exon per million mapped (RPKM) for each gene and the log2 RPKM ratio (stimulated/resting) that were used for the analysis of changes in gene expression.

**Supplemental Table 4. Ingenuity Pathway Analysis results for alternative splicing events.** Complete list of genes and statistics above threshold of p<0.03 for (A) Functional analysis and (B) Canonical Signaling pathway analysis.

**Supplemental Table 5. Ingenuity Pathway Analysis results for targets of regulated gene expression.** Complete list of genes and statistics above threshold of p<0.03 for (A) Functional analysis of genes up-regulated. (B) Functional analysis of genes down-regulated. (C) Canonical Signaling pathway analysis of genes up-regulated. (D) Canonical Signaling pathway analysis of genes down-regulated.

**Supplemental Table 6. Primer sequences used for RT-PCR analysis.** Complete primer sequences for genes analyzed in this study. Primers are written 5’ to 3’. Sizes of RT-PCR products are rounded to the nearest ten.

**Supplemental Fig 1. Comparison of IPA analysis of gene expression (GE) and alternative splicing (AS) changes upon stimulation of JSL1 cells.** (A) Functional categories enriched in genes up-regulated (red) vs. down- regulated (blue) upon stimulation. (B) Functional categories enriched in all genes that change expression (GE, red) vs. splicing (AS, blue). (C) Signaling pathways enriched in genes up-regulated (red) vs. down-regulated (blue) upon stimulation. (D) Signaling pathways enriched in all genes that change expression (GE, red) vs. splicing (AS, blue).

**Supplemental Fig 2. Details of enriched motif analysis.** Exact sequences and locations thereof for the sequences which match enriched motifs identified in Figure 5. Data presented as provided by MEME suite analysis (Bailey et al., 2009).
