# Supplementary material
Source: HighWire-hosted journal article supplement (doi:10.1101/rna.032243.112)
Supplement: Supplemental_Table_3.xlsx [file Supplemental_Table_3.xlsx]

## Sheet: Sheet1
RefSeq	Gene name/symbol	Length of transcript	Number of reads mapped to RefSeq		RPKM		Reads per 50 bp		Differential
			resting	stimulated	resting	stimulated	resting	stimulated	resting-stim	ABS(log(diff))
NM_002112.2	HDC	2440	0	4112	0	41.6549	0	84.2623	0	#NUM!
XM_002347902.1	LOC100291212	1123	0	767	0	16.8818	0	34.1496	0	#NUM!
NM_052891.1	PGLYRP3	1187	0	366	0	7.62138	0	15.417	0	#NUM!
NM_020393.2	PGLYRP4	1876	0	463	0	6.1003	0	12.3401	0	#NUM!
NM_002965.3	S100A9	593	0	152	0	6.33566	0	12.8162	0	#NUM!
NM_138787.2	C11orf74	847	233	0	6.23156	0	13.7544	0	#DIV/0!	#DIV/0!
NM_000050.4	ASS1	1886	5145	23	61.797	0.301432	136.4	0.609756	205.012	7.67956
NM_004621.5	TRPC6	4669	9	1524	0.0436659	8.06797	0.0963804	16.3204	0.00541226	7.52955
NM_000448.2	RAG1	6664	9438	47	32.0826	0.174327	70.8133	0.352641	184.036	7.52385
NM_014485.2	HPGDS	1635	3	495	0.041565	7.48325	0.0917431	15.1376	0.0055544	7.49215
NM_032554.3	GPR81	3014	4	659	0.0300636	5.40437	0.066357	10.9323	0.00556283	7.48997
XR_079319.1	LOC100131490	800	19	3015	0.538007	93.1538	1.1875	188.438	0.00577547	7.43585
XM_002343181.1	LOC100287398	800	19	3015	0.538007	93.1538	1.1875	188.438	0.00577547	7.43585
NM_000536.2	RAG2	2470	1196	7	10.9688	0.0700493	24.2105	0.1417	156.586	7.29082
NM_004120.3	GBP2	2627	29	3918	0.25007	36.8644	0.55196	74.5718	0.00678351	7.20375
NM_001430.3	EPAS1	5250	140	16407	0.604078	77.2454	1.33333	156.257	0.00782024	6.99857
NM_022652.2	DUSP6	2434	89	10035	0.828311	101.906	1.82827	206.142	0.00812819	6.94285
NM_006121.3	KRT1	2481	183	17084	1.67089	170.202	3.68803	344.297	0.00981708	6.67049
XM_002348090.1	LOC100290807	908	3	237	0.0748444	6.45157	0.165198	13.0507	0.011601	6.42961
XM_002343760.1	LOC100289664	908	3	236	0.0748444	6.42435	0.165198	12.9956	0.0116501	6.42351
NM_002404.1	MFAP4	1852	461	5	5.63876	0.0667317	12.446	0.134989	84.4991	6.40086
XM_002345500.1	LOC100293185	855	3	220	0.0794839	6.36004	0.175439	12.8655	0.0124974	6.32223
NM_052942.3	GBP5	4115	42	2909	0.231208	17.4734	0.510328	35.3463	0.013232	6.23982
NR_026800.1	KIAA0125	9733	128	8772	0.297912	22.2769	0.657557	45.0632	0.0133731	6.22452
NM_203377.1	MB	1184	4	259	0.0765301	5.40693	0.168919	10.9375	0.0141541	6.14264
XR_041107.2	LOC149086	1198	790	11	14.9381	0.226955	32.9716	0.459098	65.8196	6.04045
NM_005583.3	LYL1	1528	47	2528	0.696785	40.8937	1.53796	82.7225	0.0170389	5.87502
NR_027085.1	LOC284551	2775	2023	33	16.5142	0.293937	36.4505	0.594595	56.1827	5.81206
NM_020370.1	GPR84	1565	11	524	0.159222	8.27599	0.351438	16.7412	0.019239	5.69982
NM_004787.1	SLIT2	5011	31	1461	0.14014	7.20657	0.309319	14.5779	0.0194461	5.68438
NM_001143676.1	SGK1	3248	88	4112	0.613749	31.2925	1.35468	63.3005	0.0196133	5.67202
NM_005508.4	CCR4	1677	76	3452	1.02661	50.8793	2.26595	102.922	0.0201773	5.63112
XM_002345764.1	LOC100293496	736	5	212	0.153892	7.11969	0.339674	14.4022	0.021615	5.53182
XM_002342456.1	LOC100287256	736	5	210	0.153892	7.05252	0.339674	14.2663	0.0218209	5.51815
NM_003005.3	SELP	3224	30	1198	0.21079	9.1847	0.465261	18.5794	0.0229501	5.44535
NM_201649.2	SLC6A9	3417	725	17	4.80637	0.122972	10.6087	0.248756	39.085	5.28854
NM_006144.3	GZMA	924	221	7898	5.41807	211.275	11.9589	427.381	0.0256446	5.2852
NM_058172.5	ANTXR2	8158	125	4348	0.347097	13.1737	0.766119	26.6487	0.0263476	5.24618
NM_012082.3	ZFPM2	4563	30	1011	0.148934	5.47651	0.328731	11.0782	0.0271951	5.20051
NM_003152.3	STAT5A	4367	643	21133	3.33543	119.614	7.36203	241.962	0.027885	5.16437
NR_026671.1	CD69	1032	90	2775	1.97554	66.464	4.36047	134.448	0.0297235	5.07225
NM_001017920.2	DAPL1	557	9	263	0.366026	11.6709	0.807899	23.6086	0.0313623	4.99483
NM_018690.2	APOB48R	3779	31	873	0.185827	5.71006	0.410161	11.5507	0.0325438	4.94147
NM_002341.1	LTB	905	21	577	0.525648	15.7591	1.16022	31.8785	0.0333553	4.90594
NM_025170.4	PREX2	3061	95	2504	0.703047	20.2197	1.55178	40.9017	0.0347704	4.84599
NM_002729.4	HHEX	1794	65	1689	0.820758	23.2707	1.81159	47.0736	0.0352699	4.82542
XM_002342486.1	LOC100287976	801	623	22	17.6189	0.67888	38.8889	1.37328	25.9529	4.69783
XM_002346637.1	LOC100290796	801	623	22	17.6189	0.67888	38.8889	1.37328	25.9529	4.69783
XM_002345785.1	LOC100293986	801	623	22	17.6189	0.67888	38.8889	1.37328	25.9529	4.69783
XM_002343386.1	LOC100288183	960	219	8	5.1677	0.205978	11.4062	0.416667	25.0885	4.64896
XM_002347567.1	LOC100290350	960	219	8	5.1677	0.205978	11.4062	0.416667	25.0885	4.64896
XM_002344875.1	LOC100292325	960	219	8	5.1677	0.205978	11.4062	0.416667	25.0885	4.64896
NM_015345.2	DAAM2	6292	2409	92	8.67306	0.361412	19.1434	0.731087	23.9977	4.58483
NM_003810.2	TNFSF10	1798	85	1826	1.07091	25.1023	2.36374	50.7786	0.0426618	4.55091
NM_016205.1	PDGFC	3044	2787	111	20.7404	0.901325	45.7786	1.82326	23.011	4.52425
NM_001268.2	RCBTB2	3244	603	12599	4.21076	95.9971	9.29408	194.189	0.0438634	4.51084
NM_022367.2	SEMA4A	3297	54	1120	0.371021	8.39657	0.818926	16.9851	0.0441872	4.50023
NM_002467.4	MYC	2408	6916	282	65.0613	2.89465	143.605	5.85548	22.4764	4.49034
NM_005767.5	LPAR6	3081	59	1188	0.433795	9.53076	0.957481	19.2795	0.0455152	4.45751
NM_005226.2	S1PR3	4273	2733	115	14.4887	0.665224	31.9799	1.34566	21.7802	4.44495
NM_006000.1	TUBA4A	1532	107	2015	1.58216	32.5102	3.49217	65.7637	0.0486665	4.36093
NM_020988.2	GNAO1	3373	1035	49	6.95101	0.359073	15.3424	0.726356	19.3582	4.27487
NM_012074.3	DPF3	2299	272	4557	2.68012	48.994	5.91562	99.1083	0.054703	4.19224
NM_001099691.1	TGFA	4314	146	2381	0.766649	13.6421	1.69217	27.5962	0.0561972	4.15336
NM_012296.2	GAB2	6128	4935	260	18.2428	1.04872	40.266	2.12141	17.3954	4.12064
NM_001080527.1	MYO7B	6798	67595	3615	225.246	13.1441	497.168	26.5887	17.1367	4.09902
NM_172217.2	IL16	8442	604	9168	1.62075	26.8431	3.57735	54.2999	0.0603786	4.04982
NM_032883.2	TOX2	2589	299	4499	2.61615	42.9524	5.77443	86.8868	0.0609083	4.03722
NM_004083.4	DDIT3	938	4001	224	96.6251	5.90267	213.273	11.9403	16.3697	4.03296
NM_020182.3	PMEPA1	4991	18409	1035	83.5539	5.12573	184.422	10.3687	16.3009	4.02688
NM_006287.4	TFPI	3976	134	1994	0.763453	12.396	1.68511	25.0755	0.0615886	4.02119
NM_001127496.1	SPRY4	5002	69	1009	0.312485	4.98598	0.689724	10.086	0.0626728	3.99602
NM_030893.2	CD1E	2088	7080	421	76.8116	4.98373	169.54	10.0814	15.4125	3.94603
NM_177553.2	GAS2	2209	891	57	9.13705	0.637797	20.1675	1.29018	14.326	3.84056
NM_033120.2	NKD2	1820	1777	114	22.1177	1.54823	48.8187	3.13187	14.2858	3.83651
NM_020848.1	KIAA1462	7661	124	1596	0.366657	5.14933	0.809294	10.4164	0.0712049	3.81188
NM_012068.4	ATF5	2296	9812	643	96.8077	6.92217	213.676	14.0026	13.9852	3.80583
NM_000071.2	CBS	2641	3922	262	33.6406	2.45209	74.2522	4.96024	13.7192	3.77812
NM_021158.3	TRIB3	2499	18116	1250	164.218	12.3637	362.465	25.01	13.2823	3.73143
NM_006041.1	HS3ST3B1	2057	237	2828	2.60999	33.9819	5.76082	68.7409	0.0768051	3.70265
NM_002957.4	RXRA	5616	344	4024	1.38757	17.7106	3.06268	35.8262	0.0783468	3.67398
NM_001848.2	COL6A1	4299	233	2722	1.22776	15.6503	2.70993	31.6585	0.0784493	3.6721
NM_182538.4	SPNS3	1938	4363	316	50.9983	4.03029	112.564	8.15273	12.6537	3.66149
NM_003254.2	TIMP1	942	111	1278	2.66929	33.5338	5.89172	67.8344	0.0796	3.65109
NM_003061.2	SLIT1	8048	11396	889	32.0766	2.73034	70.8002	5.52311	11.7482	3.55437
NM_000655.3	SELL	2478	3103	33317	28.3664	332.329	62.611	672.256	0.0853566	3.55035
NM_001142776.1	CHAC1	1461	754	59	11.6908	0.998171	25.8042	2.01916	11.7123	3.54995
NM_001130961.1	PLCH1	6553	404	4287	1.39658	16.1702	3.08256	32.7102	0.0863672	3.53337
NM_003335.2	UBA7	3371	186	1950	1.24991	14.2981	2.75883	28.9232	0.0874177	3.51593
NM_032855.2	HSH2D	2398	110	1147	1.03912	11.8227	2.29358	23.9158	0.0878922	3.50812
NM_007361.3	NID2	5126	307	3161	1.3567	15.2422	2.99454	30.833	0.0890092	3.4899
NM_020226.3	PRDM8	4169	426	4338	2.31474	25.7194	5.10914	52.0269	0.0899997	3.47394
NM_006558.1	KHDRBS3	1987	5797	480	66.089	5.97099	145.873	12.0785	11.0684	3.46837
NM_001166060.1	GLRB	3097	1458	121	10.6645	0.965711	23.5389	1.9535	11.0432	3.46508
NM_006237.3	POU4F1	3864	1339	13396	7.84996	85.6922	17.3266	173.344	0.0916065	3.44841
NM_005264.4	GFRA1	9699	10728	912	25.0562	2.32419	55.3047	4.70152	10.7806	3.43037
NM_019609.3	CPXM1	2419	73	718	0.683614	7.33655	1.50889	14.8408	0.0931793	3.42385
NM_001964.2	EGR1	3175	287	2791	2.04768	21.728	4.51969	43.9528	0.0942417	3.40749
NM_021021.3	SNTB1	5037	2627	227	11.8144	1.11393	26.077	2.25333	10.6061	3.40682
NM_003485.3	GPR68	2869	107	1017	0.844845	8.7618	1.86476	17.7239	0.0964237	3.37447
NM_000369.2	TSHR	4465	2264	202	11.4863	1.11823	25.3527	2.26204	10.2718	3.36062
NM_003714.2	STC2	5428	3610	335	15.0658	1.52549	33.2535	3.08585	9.87605	3.30393
NM_022440.1	MAL	771	1003	94	29.4694	3.01354	65.0454	6.09598	9.77899	3.28969
NM_014331.3	SLC7A11	9768	2942	278	6.82278	0.703464	15.0594	1.42301	9.69882	3.27781
NM_004907.2	IER2	2114	1451	12219	15.5484	142.868	34.3188	289.002	0.108831	3.19984
NM_001008540.1	CXCR4	1935	12443	1271	145.669	16.2356	321.525	32.8424	8.97223	3.16547
NR_026880.1	MGC12916	2031	90	731	1.00382	8.89632	2.21566	17.9961	0.112836	3.14771
NM_005524.2	HES1	1489	126	1015	1.9169	16.849	4.23103	34.0833	0.113769	3.13582
NM_000074.2	CD40LG	1856	789	6349	9.62993	84.5533	21.2554	171.04	0.113892	3.13426
NM_005630.2	SLCO2A1	4286	118	948	0.623669	5.46713	1.37657	11.0593	0.114076	3.13193
NM_024608.2	NEIL1	1930	66	529	0.774659	6.77488	1.70984	13.7047	0.114343	3.12856
NM_001142466.1	GPT2	3927	2880	302	16.6133	1.90086	36.6692	3.84517	8.7399	3.12762
NM_005615.4	RNASE6	1078	74	591	1.55502	13.551	3.43228	27.4119	0.114753	3.12339
NM_022136.3	SAMSN1	1916	145	1152	1.71434	14.8614	3.78392	30.0626	0.115355	3.11585
NM_033014.2	OGN	3106	962	102	7.01613	0.811712	15.4862	1.64198	8.64363	3.11164
XM_001722018.2	LOC100131109	1675	80	630	1.08193	9.2967	2.38806	18.806	0.116378	3.10311
XM_001717791.2	LOC100130503	3427	3257	352	21.5292	2.53882	47.5197	5.13569	8.48001	3.08407
XR_078259.1	LOC100131662	439	208	23	10.733	1.29499	23.6902	2.61959	8.28813	3.05105
XM_001726614.2	LOC100134359	2976	1368	10320	10.413	85.7136	22.9839	173.387	0.121486	3.04113
NM_001130141.1	PCBP3	1946	144	1079	1.67627	13.7051	3.6999	27.7235	0.12231	3.03139
XM_002344666.1	LOC100291695	482	98	11	4.60578	0.56409	10.166	1.14108	8.16497	3.02945
NM_001764.2	CD1B	1413	1672	189	26.8051	3.30615	59.1649	6.6879	8.10766	3.01929
NM_001142532.1	SH2D3C	2841	574	4261	4.57683	37.0718	10.1021	74.9912	0.123459	3.0179
NM_001024844.1	CD82	1660	1034	7651	14.1103	113.923	31.1446	230.452	0.123858	3.01324
NM_032251.4	CCDC88B	4988	404	2988	1.83476	14.8067	4.04972	29.9519	0.123914	3.01258
NM_001010990.1	HERPUD1	2149	6893	790	72.6601	9.08644	160.377	18.3806	7.99654	2.99938
NM_024503.3	HIVEP3	8985	688	5007	1.73458	13.7741	3.8286	27.8631	0.125931	2.9893
NM_198399.1	ARPP-21	2443	770	89	7.13989	0.900471	15.7593	1.82153	7.92906	2.98715
NR_003945.1	GVIN1	8850	498	3527	1.27471	9.85066	2.81356	19.9266	0.129403	2.95006
NM_005331.3	HBQ1	659	160	19	5.49995	0.712642	12.1396	1.44158	7.71769	2.94817
NM_206967.2	C16orf74	910	268	32	6.67141	0.869184	14.7253	1.75824	7.67549	2.94026
NM_006504.4	PTPRE	5459	1084	7620	4.49822	34.502	9.92856	69.793	0.130375	2.93926
NM_003026.2	SH3GL2	2779	562	68	4.58112	0.604816	10.1116	1.22346	7.5744	2.92113
NM_023107.2	FGFR1	2842	111	768	0.884755	6.67944	1.95285	13.5116	0.132459	2.91638
NM_006623.3	PHGDH	2046	19283	2344	213.498	28.3175	471.237	57.2825	7.53942	2.91445
NM_021822.2	APOBEC3G	1850	83	562	1.01632	7.50875	2.24324	15.1892	0.135351	2.88522
NM_153370.2	PI16	2232	365	2468	3.70444	27.3309	8.17652	55.2867	0.13554	2.88321
NM_001245.4	SIGLEC6	2101	64	431	0.690046	5.07054	1.52308	10.257	0.136089	2.87738
NM_018099.3	FAR2	2262	121	814	1.21176	8.89477	2.67462	17.9929	0.136233	2.87585
NM_001017520.1	DNTT	2093	3037	380	32.87	4.48763	72.5514	9.07788	7.32457	2.87274
NM_058179.2	PSAT1	2248	7836	983	78.9627	10.8084	174.288	21.8639	7.3057	2.86902
NM_020639.2	RIPK4	3938	1372	174	7.89228	1.09214	17.42	2.20924	7.22646	2.85329
XM_001717260.1	GAFA1	558	36	237	1.46148	10.4983	3.22581	21.2366	0.139212	2.84465
NM_178862.1	STT3B	2512	8802	56708	79.3754	557.992	175.199	1128.74	0.142252	2.81348
NM_015568.2	PPP1R16B	6329	1143	7315	4.09105	28.5682	9.02986	57.7895	0.143203	2.80386
NM_022904.1	RASAL3	3331	1202	7585	8.17436	56.2839	18.0426	113.855	0.145235	2.78354
NM_198471.2	KANK3	2836	107	675	0.854676	5.88302	1.88646	11.9006	0.145278	2.78311
NM_016459.3	MGC29506	855	5399	721	143.045	20.8436	315.731	42.1637	6.86276	2.77879
XM_002345315.1	LOC100293438	1099	401	54	8.26553	1.2145	18.2439	2.45678	6.80568	2.76674
NM_000435.2	NOTCH3	8190	4314	581	11.9322	1.75346	26.337	3.54701	6.80495	2.76658
NM_033285.3	TP53INP1	5698	501	3112	1.99177	13.4996	4.39628	27.3078	0.147543	2.76079
NM_001079818.1	ITGA6	5750	1023	6312	4.03025	27.1333	8.89565	54.887	0.148535	2.75112
NM_001099733.1	ADCYAP1	3226	353	2178	2.47876	16.6877	5.47117	33.757	0.148538	2.7511
XM_002344976.1	LOC100291714	3329	878	5396	5.97454	40.0646	13.1871	81.0454	0.149123	2.74543
NM_182705.2	FAM101B	3943	1088	6637	6.25066	41.6052	13.7966	84.1618	0.150237	2.73468
XM_001724979.2	LOC100133632	2365	589	3582	5.64168	37.4367	12.4524	75.7294	0.150699	2.73026
NM_006509.2	RELB	2315	121	733	1.18402	7.82629	2.61339	15.8315	0.151287	2.72464
NM_018986.3	SH3TC1	4326	2222	310	11.6354	1.77124	25.6819	3.58299	6.56906	2.71569
XM_001715758.2	LOC100131014	2031	134	798	1.49458	9.71172	3.29887	19.6455	0.153894	2.69999
NM_001040078.2	LGALS9C	1764	125	742	1.60522	10.397	3.54308	21.0317	0.154393	2.69532
NM_018248.2	NEIL3	2432	3512	500	32.7126	5.08171	72.2039	10.2796	6.43733	2.68646
NM_005604.2	POU3F2	4224	1305	186	6.99859	1.08841	15.4474	2.2017	6.43011	2.68484
NM_001335.3	CTSW	1343	515	3030	8.68671	55.766	19.1735	112.807	0.155771	2.6825
NM_002076.3	GNS	5208	2283	13378	9.93022	63.4926	21.9182	128.437	0.1564	2.67669
NM_001135820.1	TMEM2	6430	732	4274	2.57884	16.4296	5.69207	33.2348	0.156963	2.6715
NM_144975.3	SLFN5	4718	2266	13229	10.8799	69.3062	24.0144	140.197	0.156983	2.67132
NM_017831.3	RNF125	5961	344	1976	1.30726	8.19353	2.88542	16.5744	0.159548	2.64793
NM_001803.2	CD52	529	135	774	5.78099	36.165	12.7599	73.1569	0.15985	2.64521
NM_001025101.1	MBP	2828	224	1279	1.79429	11.1788	3.9604	22.6132	0.160509	2.63928
NM_001008530.1	LGMN	2193	1440	213	14.8747	2.40073	32.8317	4.85636	6.19589	2.63131
XM_001714877.2	LOC100134372	837	571	3238	15.4538	95.6212	34.1099	193.429	0.161614	2.62937
XM_002343307.1	LOC100289418	837	571	3238	15.4538	95.6212	34.1099	193.429	0.161614	2.62937
NM_181501.1	ITGA1	4871	194	1099	0.90221	5.57677	1.99138	11.2811	0.16178	2.62789
NM_006762.2	LAPTM5	2267	4189	23559	41.8584	256.867	92.3908	519.607	0.162958	2.61743
NM_004926.2	ZFP36L1	3059	1663	9324	12.3151	75.34	27.1821	152.403	0.16346	2.61299
NM_005347.3	HSPA5	4014	21942	3334	123.829	20.5301	273.318	41.5296	6.03159	2.59254
NM_001037666.2	GATSL3	1664	366	2016	4.98255	29.9461	10.9976	60.5769	0.166384	2.58741
NM_009587.2	LGALS9	1857	391	2135	4.76968	28.4177	10.5277	57.4852	0.167842	2.57483
NM_005704.3	PTPRU	5679	4443	686	17.7226	2.98576	39.1178	6.0398	5.93572	2.56942
NM_004454.2	ETV5	4153	695	3780	3.79094	22.4974	8.36745	45.5093	0.168505	2.56913
NM_001007469.1	HCST	527	236	1282	10.1444	60.1285	22.3909	121.632	0.168712	2.56737
NM_001042685.1	LGALS9B	1258	180	976	3.24128	19.1766	7.15421	38.7917	0.169022	2.56472
NM_006139.2	CD28	3854	2201	11922	12.937	76.4611	28.5547	154.67	0.169197	2.56323
NM_004095.3	EIF4EBP1	887	1326	206	33.8644	5.74046	74.7463	11.6122	5.89926	2.56053
NM_003320.4	TUB	6512	2276	355	7.91739	1.34746	17.4754	2.72574	5.87577	2.55478
NM_012182.2	FOXB1	1477	79	422	1.21163	7.06212	2.67434	14.2857	0.171568	2.54315
NM_130446.2	KLHL6	6398	482	2562	1.70658	9.89778	3.7668	20.0219	0.172421	2.536
XM_002342280.1	LOC100287375	537	51	271	2.15139	12.4738	4.7486	25.2328	0.172473	2.53555
XM_002346440.1	LOC100290328	537	51	271	2.15139	12.4738	4.7486	25.2328	0.172473	2.53555
XM_002345589.1	LOC100292191	537	51	271	2.15139	12.4738	4.7486	25.2328	0.172473	2.53555
XM_002343191.1	LOC100288653	401	86	456	4.85823	28.1076	10.7232	56.8579	0.172844	2.53246
XM_002347365.1	LOC100289925	401	87	461	4.91472	28.4158	10.8479	57.4813	0.172957	2.53151
XM_002344687.1	LOC100293441	401	87	461	4.91472	28.4158	10.8479	57.4813	0.172957	2.53151
NM_006988.3	ADAMTS1	4728	423	2241	2.02669	11.7157	4.47335	23.6992	0.172989	2.53124
NM_152446.3	C14orf145	4516	2532	402	12.7009	2.20027	28.0337	4.45084	5.77243	2.52918
XR_078312.1	LOC100288073	1980	538	86	6.15519	1.07358	13.5859	2.17172	5.7333	2.51937
XR_079163.1	LOC100290884	1980	538	86	6.15519	1.07358	13.5859	2.17172	5.7333	2.51937
XR_078981.1	LOC100291564	1980	538	86	6.15519	1.07358	13.5859	2.17172	5.7333	2.51937
XM_002343348.1	LOC100287115	1573	83	436	1.19529	6.85111	2.63827	13.8589	0.174467	2.51898
XM_002344860.1	LOC100293316	1573	83	436	1.19529	6.85111	2.63827	13.8589	0.174467	2.51898
XM_002346794.1	LOC100290255	1193	169	883	3.209	18.2946	7.08298	37.0075	0.175407	2.51122
XM_002342626.1	LOC100287733	1193	169	881	3.209	18.2532	7.08298	36.9237	0.175805	2.50795
XM_002345893.1	LOC100291554	1105	169	880	3.46456	19.6845	7.64706	39.819	0.176005	2.50631
NM_175738.4	RAB37	3129	587	3056	4.24968	24.1408	9.37999	48.8335	0.176038	2.50604
NM_001134663.1	SAMD13	1593	320	52	4.55049	0.806846	10.0439	1.63214	5.63985	2.49566
NM_014629.2	ARHGEF10	5664	3820	624	15.2779	2.7231	33.7218	5.50847	5.61048	2.48812
NM_152321.2	ERP27	1555	199	1023	2.89899	16.261	6.39871	32.8939	0.178278	2.4878
XM_002343536.1	LOC100289432	1084	671	3440	14.0222	78.439	30.9502	158.672	0.178766	2.48386
XM_002347786.1	LOC100290387	1084	671	3440	14.0222	78.439	30.9502	158.672	0.178766	2.48386
XM_002345060.1	LOC100293514	1084	671	3440	14.0222	78.439	30.9502	158.672	0.178766	2.48386
NM_032206.3	NLRC5	6907	647	3310	2.12197	11.8452	4.68365	23.9612	0.179142	2.48082
NM_005565.3	LCP2	2502	2530	12297	22.9064	121.483	50.5596	245.743	0.188557	2.40693
NM_198282.1	TMEM173	1735	813	3948	10.6149	56.2446	23.4294	113.775	0.188727	2.40563
NM_207459.2	TEX19	1926	822	143	9.66807	1.8352	21.3396	3.71236	5.26813	2.39729
NM_003650.2	CST7	939	665	116	16.0428	3.05348	35.41	6.17678	5.25393	2.3934
NM_002019.4	FLT1	7212	595	2856	1.8689	9.78826	4.12507	19.8003	0.190932	2.38887
NM_004758.2	BZRAP1	7802	1102	5287	3.19963	16.7497	7.06229	33.8823	0.191026	2.38816
NM_201443.1	TEAD4	1544	626	110	9.18441	1.76096	20.272	3.56218	5.21558	2.38283
NM_004793.2	LONP1	3149	23160	4074	166.606	31.978	367.736	64.6872	5.21001	2.38129
NM_001025366.1	VEGFA	3710	2765	488	16.8828	3.25124	37.2642	6.57682	5.19274	2.3765
NM_005127.2	CLEC2B	2077	214	1017	2.334	12.1028	5.15166	24.4824	0.192847	2.37447
NM_001164664.1	MAST4	10858	803	3795	1.67529	8.63903	3.69773	17.4756	0.193921	2.36646
NM_002463.1	MX2	2998	269	1268	2.03257	10.4542	4.48632	21.1474	0.194426	2.36271
NM_001037540.1	SCML1	2959	243	1144	1.86031	9.55617	4.10612	19.3309	0.194671	2.36089
NM_005516.4	HLA-E	1722	2046	9626	26.9151	138.171	59.4077	279.501	0.194796	2.35996
NM_001230.4	CASP10	5849	389	1826	1.50658	7.71653	3.32535	15.6095	0.19524	2.35668
NM_002305.3	LGALS1	593	144	670	5.50088	27.9269	12.1417	56.4924	0.196974	2.34392
NM_001008699.1	IL4R	1119	64	297	1.29561	6.56039	2.8597	13.2708	0.19749	2.34015
NM_001024847.2	TGFBR2	4762	1096	5083	5.21369	26.3836	11.5078	53.3704	0.197611	2.33926
NM_004442.6	EPHB2	4929	1130	206	5.1933	1.03303	11.4628	2.08967	5.02727	2.32978
NM_030576.3	LIMD2	3272	1320	6041	9.13871	45.6351	20.1711	92.3136	0.200256	2.32008
XR_039070.2	LOC400750	2022	730	134	8.17835	1.63805	18.0514	3.31355	4.99274	2.31983
XM_002347622.1	LOC730254	2507	152	695	1.37345	6.85225	3.03151	13.8612	0.200438	2.31877
NM_173042.2	IL18BP	2216	273	1244	2.79072	13.8757	6.15975	28.0686	0.201124	2.31384
NM_002646.3	PIK3C2B	7701	2156	9791	6.34199	31.4256	13.9982	63.5697	0.20181	2.30893
NM_024546.3	RNF219	3596	1513	6821	9.53111	46.8847	21.0373	94.8415	0.203288	2.2984
NM_033315.3	RASL10B	3253	892	168	6.21162	1.27652	13.7104	2.58223	4.86605	2.28275
NM_001010858.2	RNF187	3172	23580	4442	168.397	34.6137	371.69	70.0189	4.86504	2.28245
NR_027405.1	MTHFD2	2334	12570	2370	122	25.0987	269.28	50.7712	4.8608	2.28119
NM_001018073.1	PCK2	1751	1144	216	14.8001	3.04909	32.667	6.1679	4.85393	2.27915
NM_003874.2	CD84	3318	1021	4539	6.97065	33.8132	15.3858	68.3996	0.206152	2.27822
NM_018326.2	GIMAP4	2007	553	2457	6.24168	30.2594	13.7768	61.2108	0.206272	2.27738
NM_001766.3	CD1D	3842	1229	233	7.24634	1.499	15.9943	3.03227	4.83412	2.27325
NM_017839.4	LPCAT2	5462	366	1617	1.51794	7.31748	3.35042	14.8023	0.20744	2.26924
NM_017530.1	ZNF821	1864	96	422	1.16667	5.5959	2.57511	11.3197	0.208487	2.26197
NM_007161.2	LST1	774	36	157	1.05362	5.01374	2.32558	10.1421	0.210147	2.25053
XM_002344355.1	LOC100289367	475	28	122	1.33533	6.34847	2.94737	12.8421	0.210339	2.24921
XM_002346906.1	LOC100290658	475	28	122	1.33533	6.34847	2.94737	12.8421	0.210339	2.24921
XM_002346018.1	LOC100293864	475	28	122	1.33533	6.34847	2.94737	12.8421	0.210339	2.24921
NM_005853.5	IRX5	2103	827	160	8.90821	1.88054	19.6624	3.80409	4.73703	2.24398
XR_039404.2	LOC100132814	973	45	195	1.04767	4.95364	2.31244	10.0206	0.211494	2.24131
NM_019886.2	CHST7	2359	166	717	1.59406	7.51267	3.51844	15.1971	0.212183	2.23662
NM_005841.1	SPRY1	2644	393	1693	3.36709	15.827	7.43192	32.0159	0.212744	2.23281
NM_003897.3	IER3	1269	255	1094	4.552	21.3088	10.0473	43.1048	0.213621	2.22687
XR_040516.2	LOC729683	2626	156	665	1.34572	6.25936	2.9703	12.6618	0.214993	2.21764
XR_040247.2	LOC124685	464	252	1074	12.3029	57.2123	27.1552	115.733	0.215039	2.21733
NM_022044.2	SDF2L1	886	3875	764	99.0745	21.3139	218.679	43.1151	4.64836	2.21672
NM_006435.2	IFITM2	747	547	2320	16.5879	76.7663	36.6131	155.288	0.216083	2.21034
NM_004041.3	ARRB1	2231	271	1147	2.75165	12.7077	6.07351	25.706	0.216534	2.20733
NM_001127198.1	TMC6	2927	866	3658	6.70223	30.8904	14.7933	62.4872	0.216968	2.20445
NM_001605.2	AARS	3385	22798	4540	152.568	33.1513	336.75	67.0606	4.60216	2.20231
NM_025113.2	C13orf18	4042	2011	401	11.2704	2.45217	24.8763	4.96042	4.59609	2.20041
NM_004585.3	RARRES3	788	126	530	3.62217	16.6247	7.99492	33.6294	0.217879	2.1984
NM_001142473.1	FAIM3	2807	437	1833	3.52666	16.1407	7.78411	32.6505	0.218494	2.19433
NR_024115.1	GIMAP6	3478	1732	7241	11.2809	51.4603	24.8994	104.097	0.219215	2.18958
NM_022765.3	MICAL1	3706	1872	7775	11.4426	51.8559	25.2563	104.897	0.220661	2.18009
NM_152685.3	SLC23A1	2407	612	124	5.75969	1.27335	12.7129	2.57582	4.52325	2.17736
NM_000270.2	NP	1532	3091	12736	45.7051	205.484	100.881	415.666	0.222427	2.1686
XM_002344038.1	LOC100294307	1117	222	914	4.50219	20.2253	9.93733	40.9132	0.222601	2.16747
NR_024427.1	PARVG	1197	203	834	3.84172	17.2217	8.47953	34.8371	0.223075	2.1644
NM_152468.4	TMC8	4474	2586	10595	13.0935	58.534	28.9003	118.406	0.223691	2.16042
NM_006566.2	CD226	2697	1039	4256	8.72687	39.0053	19.2621	78.9025	0.223736	2.16013
NM_004808.2	NMT2	5066	625	2554	2.79472	12.4612	6.16857	25.2073	0.224275	2.15666
NM_002051.2	GATA3	3105	3734	15232	27.2419	121.255	60.1288	245.282	0.224667	2.15414
NR_027332.1	HPGD	2808	973	3962	7.84946	34.8755	17.3255	70.5484	0.225071	2.15155
NM_001144822.1	CD58	1412	126	511	2.02144	8.94518	4.46176	18.0949	0.22598	2.14573
NM_000480.2	AMPD3	4425	757	3070	3.87531	17.1486	8.55367	34.6893	0.225984	2.1457
NM_024491.2	CEP70	2711	5502	1151	45.9743	10.4942	101.475	21.2283	4.38093	2.13124
NR_003098.1	SNHG1	1148	7063	1481	139.371	31.8872	307.622	64.5035	4.37074	2.12788
NM_203370.1	C3orf54	1071	83	332	1.75555	7.66217	3.87488	15.4995	0.229119	2.12583
NM_024637.4	GAL3ST4	2593	336	1340	2.93536	12.7734	6.47898	25.8388	0.229803	2.12153
NM_004280.4	EEF1E1	1116	1741	368	35.3394	8.15054	78.0018	16.4875	4.33583	2.11631
XM_002342466.1	LOC100288955	1396	312	66	5.06283	1.16859	11.1748	2.3639	4.33243	2.11518
XM_002346619.1	LOC100290708	1396	312	66	5.06283	1.16859	11.1748	2.3639	4.33243	2.11518
XM_002345770.1	LOC100292234	1396	312	66	5.06283	1.16859	11.1748	2.3639	4.33243	2.11518
XR_078649.1	LOC100294252	582	371	1471	14.4403	62.473	31.8729	126.375	0.231144	2.11314
NM_001629.2	ALOX5AP	883	711	2806	18.2403	78.5471	40.2605	158.89	0.232222	2.10642
NM_153824.1	PYCR1	1790	1293	280	16.3632	3.86641	36.1173	7.82123	4.23215	2.08139
NM_012214.2	MGAT4A	8486	8858	1924	23.6459	5.60409	52.1918	11.3363	4.21941	2.07704
NM_175077.1	SLA2	2477	590	2276	5.39573	22.7117	11.9096	45.9427	0.237575	2.07354
XM_002343048.1	LOC100289043	694	43	165	1.40357	5.87662	3.09798	11.8876	0.238839	2.06589
XM_002347219.1	LOC100289791	694	43	165	1.40357	5.87662	3.09798	11.8876	0.238839	2.06589
NM_006086.2	TUBB3	1757	121	464	1.56005	6.52754	3.44337	13.2043	0.238995	2.06495
NM_025218.2	ULBP1	3199	743	163	5.26137	1.25944	11.613	2.54767	4.17756	2.06266
XR_078651.1	LOC100294323	936	116	444	2.80741	11.7249	6.19658	23.7179	0.23944	2.06227
XR_078634.1	LOC100294121	805	137	524	3.85522	16.0893	8.50932	32.5466	0.239613	2.06122
XR_078639.1	LOC100294167	805	137	524	3.85522	16.0893	8.50932	32.5466	0.239613	2.06122
XR_078644.1	LOC100294197	805	137	524	3.85522	16.0893	8.50932	32.5466	0.239613	2.06122
XR_078648.1	LOC100294285	805	137	524	3.85522	16.0893	8.50932	32.5466	0.239613	2.06122
NM_005139.2	ANXA3	1654	414	91	5.67008	1.35991	12.5151	2.75091	4.16946	2.05986
NM_006290.2	TNFAIP3	4501	2286	8724	11.5051	47.9082	25.3944	96.9118	0.240149	2.058
NM_153236.3	GIMAP7	1257	659	2512	11.8761	49.3955	26.2132	99.9204	0.240429	2.05632
NM_021114.2	SPINK2	598	57	215	2.15922	8.8867	4.76589	17.9766	0.242973	2.04113
NM_020415.2	RETN	484	86	323	4.0251	16.4953	8.8843	33.3678	0.244015	2.03496
NM_015103.2	PLXND1	7064	1189	4463	3.8129	15.6163	8.41591	31.5898	0.244161	2.0341
NM_002373.5	MAP1A	10403	8569	1922	18.6593	4.56665	41.1852	9.23772	4.08599	2.03069
NM_001979.4	EPHX2	2223	2715	610	27.6665	6.78256	61.0661	13.7202	4.07907	2.02824
NM_145738.2	SYNGR1	1323	314	71	5.37643	1.32648	11.867	2.6833	4.05315	2.01904
NR_028000.1	RDM1	907	185	42	4.62049	1.14458	10.1985	2.31533	4.03686	2.01323
NM_006286.3	TFDP2	1329	10679	2430	182.024	45.1944	401.768	91.4221	4.02759	2.00992
NM_133471.3	KIAA1949	4672	3266	12050	15.8357	63.751	34.9529	128.96	0.248399	2.00927
NM_001080420.1	SHANK3	7234	786	2889	2.46132	9.87125	5.43268	19.9682	0.249342	2.0038
NM_005194.2	CEBPB	1859	2421	556	29.5012	7.39262	65.1157	14.9543	3.99063	1.99662
NM_152855.1	IGLL1	794	1166	268	33.2661	8.34291	73.4257	16.8766	3.98735	1.99543
NM_005514.6	HLA-B	1597	5091	18536	72.2141	286.889	159.393	580.338	0.251714	1.99014
NM_021019.3	MYL6	767	2750	10007	81.2197	322.487	179.27	652.347	0.251855	1.98934
XR_018889.3	LOC441228	3485	1858	429	12.0772	3.04269	26.6571	6.15495	3.96926	1.98887
NM_007235.3	XPOT	3929	7854	1814	45.2828	11.4119	99.9491	23.0848	3.96803	1.98842
NM_033544.2	RCCD1	2808	1716	397	13.8434	3.49459	30.5556	7.06909	3.96139	1.98601
NM_004052.2	BNIP3	1554	1268	294	18.4838	4.67627	40.7979	9.45946	3.95269	1.98284
NM_001098479.1	HLA-F	1610	283	1025	3.98185	15.7362	8.78882	31.8323	0.253037	1.98258
NM_003820.2	TNFRSF14	1751	263	951	3.40246	13.4245	7.50999	27.1559	0.253452	1.98021
XM_001722866.2	LOC100128156	672	1043	243	35.1592	8.93799	77.6042	18.0804	3.93368	1.97588
NM_152574.1	TTC39B	2458	316	1124	2.91225	11.3028	6.42799	22.8641	0.257657	1.95648
NM_001097634.1	GCNT1	6058	370	1315	1.38356	5.36537	3.05381	10.8534	0.257868	1.9553
NM_020524.2	PBXIP1	3253	1171	4159	8.15449	31.6015	17.9988	63.9256	0.258041	1.95433
NM_014308.3	PIK3R5	4504	876	3096	4.40585	16.9905	9.72469	34.3694	0.259313	1.94723
NM_001025265.1	CXorf65	573	54	190	2.13483	8.196	4.71204	16.5794	0.260472	1.9408
NM_014387.3	LAT	1789	4388	15419	55.5623	213.034	122.638	430.939	0.260814	1.93891
NM_032536.2	NTNG2	3151	327	1149	2.35084	9.01311	5.18883	18.2323	0.260825	1.93885
NM_004106.1	FCER1G	598	97	340	3.67447	14.0534	8.11037	28.4281	0.261465	1.93531
NM_181900.2	STARD5	1360	112	392	1.86553	7.12443	4.11765	14.4118	0.26185	1.93319
NM_004416.2	DTX1	3358	1126	3933	7.59594	28.9498	16.7659	58.5616	0.262383	1.93025
NM_006931.2	SLC2A3	3987	371	1295	2.10791	8.02835	4.65262	16.2403	0.262558	1.92929
XM_002342138.1	LOC100289369	799	220	765	6.23735	23.6656	13.7672	47.8723	0.263562	1.92379
XM_002347500.1	LOC100291072	799	220	765	6.23735	23.6656	13.7672	47.8723	0.263562	1.92379
NM_138559.1	BCL11A	2387	1316	320	12.489	3.3136	27.566	6.70297	3.76901	1.91418
NM_001005407.1	CACNA1H	8179	657	2269	1.81966	6.85705	4.01638	13.8709	0.26537	1.91392
NM_178276.4	SERINC5	1500	7977	1942	120.468	32.0008	265.9	64.7333	3.76454	1.91247
NM_001025108.1	AFF3	8237	1321	4535	3.63294	13.6085	8.0187	27.5282	0.26696	1.9053
NM_000199.3	SGSH	2804	290	995	2.34285	8.77098	5.17118	17.7425	0.267114	1.90447
NM_005541.3	INPP5D	4986	880	3009	3.99811	14.9167	8.82471	30.1745	0.268029	1.89954
NM_178844.2	NLRC3	6481	1300	4441	4.54386	16.9372	10.0293	34.2617	0.268277	1.8982
NM_003299.1	HSP90B1	2814	28876	7110	232.454	62.4523	513.077	126.333	3.7221	1.89612
XM_002344406.1	LOC100287165	646	330	1125	11.5719	43.045	25.5418	87.0743	0.268833	1.89522
XM_002346948.1	LOC100289964	646	330	1125	11.5719	43.045	25.5418	87.0743	0.268833	1.89522
NM_018384.3	GIMAP5	1884	1164	3964	13.9957	52.0063	30.8917	105.202	0.269117	1.8937
XM_002346063.1	LOC100292849	645	330	1123	11.5899	43.0351	25.5814	87.0543	0.269312	1.89265
NM_006010.3	MANF	969	6449	1593	150.762	40.6345	332.766	82.1981	3.7102	1.8915
NM_001136129.2	APP	3295	804	199	5.52745	1.4928	12.2003	3.01973	3.70275	1.8886
NM_002047.2	GARS	2793	15545	3849	126.079	34.0628	278.285	68.9044	3.70138	1.88806
NM_019554.2	S100A4	571	67	227	2.65805	9.82636	5.8669	19.8774	0.270502	1.88629
NM_030640.1	DUSP16	3610	1129	280	7.08453	1.91714	15.6371	3.87812	3.69536	1.88572
NM_001077494.1	NFKB2	3167	744	2519	5.32168	19.66	11.7461	39.7695	0.270686	1.88531
NM_001822.4	CHN1	2745	812	202	6.70097	1.81891	14.7905	3.67942	3.68405	1.88129
NM_201633.2	TCF7	1269	8799	2195	157.071	42.7539	346.69	86.4854	3.67384	1.87729
NM_173849.2	GSC	1232	533	133	9.80033	2.66836	21.6315	5.39773	3.67279	1.87688
NM_021034.2	IFITM3	686	99	333	3.26915	11.9984	7.21574	24.2711	0.272466	1.87585
NM_012448.3	STAT5B	5235	4449	14963	19.2517	70.6488	42.4928	142.913	0.272499	1.87568
XM_002343739.1	LOC100288213	847	192	48	5.13502	1.40075	11.3341	2.83353	3.6659	1.87417
XM_002348056.1	LOC100290959	847	192	48	5.13502	1.40075	11.3341	2.83353	3.6659	1.87417
XM_002345440.1	LOC100292455	847	192	48	5.13502	1.40075	11.3341	2.83353	3.6659	1.87417
NM_001159629.1	SLC27A2	2277	157	527	1.56193	5.72072	3.44752	11.5722	0.27303	1.87287
NM_018401.1	STK32B	3264	862	216	5.98248	1.63571	13.2047	3.30882	3.65742	1.87083
NM_020993.3	BCL7A	3760	8228	2064	49.5713	13.5683	109.415	27.4468	3.65347	1.86927
NM_001100421.1	C21orf91	5455	1177	3928	4.88771	17.7983	10.7883	36.0037	0.274616	1.86451
XM_002342535.1	LOC100288887	544	139	35	5.78815	1.59027	12.7757	3.21691	3.63972	1.86383
XM_002346683.1	LOC100290471	544	139	35	5.78815	1.59027	12.7757	3.21691	3.63972	1.86383
XM_002345811.1	LOC100292380	544	139	35	5.78815	1.59027	12.7757	3.21691	3.63972	1.86383
NM_138928.3	MOCS1	4157	3015	760	16.4298	4.51894	36.2641	9.14121	3.63576	1.86226
XM_002343670.1	LOC100288824	1152	2369	598	46.584	12.8307	102.821	25.9549	3.63065	1.86023
XM_002345172.1	LOC100292188	1152	2369	598	46.584	12.8307	102.821	25.9549	3.63065	1.86023
NM_004177.3	STX3	3011	347	1153	2.61061	9.46502	5.76221	19.1465	0.275817	1.85822
NM_033007.3	NLRP1	5468	409	1359	1.69441	6.14319	3.73994	12.4268	0.275819	1.8582
NM_018284.2	GBP3	3089	219	727	1.60602	5.81727	3.54484	11.7676	0.276077	1.85686
NM_014689.2	DOCK10	7523	2496	8245	7.51584	27.0896	16.5891	54.7986	0.277444	1.84973
NM_003461.4	ZYX	2354	2078	6830	19.9969	71.7162	44.1376	145.072	0.278834	1.84252
NM_013417.2	IARS	4566	32344	8359	160.466	45.2503	354.183	91.5353	3.54618	1.82626
NM_013272.3	SLCO3A1	5169	2541	657	11.1358	3.14168	24.5792	6.35519	3.54454	1.8256
NM_004137.2	KCNMB1	1536	153	496	2.25644	7.98166	4.98047	16.1458	0.282703	1.82264
NM_001025252.1	TPD52	4303	7094	1838	37.346	10.5579	82.4309	21.3572	3.53726	1.82263
XM_002343687.1	LOC100287120	595	76	246	2.89348	10.2193	6.38655	20.6723	0.283139	1.82042
XM_002347967.1	LOC100289886	595	76	246	2.89348	10.2193	6.38655	20.6723	0.283139	1.82042
NM_020845.2	PITPNM2	6838	9722	2526	32.207	9.13077	71.088	18.4703	3.52731	1.81857
NM_054025.2	B3GAT1	3711	260	836	1.58711	5.56825	3.5031	11.2638	0.285028	1.81082
NM_001031680.2	RUNX3	4394	756	2430	3.8975	13.6694	8.60264	27.6513	0.285126	1.81033
XR_037136.2	LOC645381	1236	260	68	4.76518	1.35986	10.5178	2.75081	3.50417	1.80907
NM_001079874.1	VAV3	3153	1614	5180	11.5959	40.6077	25.5947	82.144	0.285558	1.80814
NM_001122607.1	RUNX1	2756	9953	2611	81.8086	23.417	180.57	47.3694	3.49356	1.8047
NR_004380.1	SNORD104	80	19	5	5.38007	1.54484	11.875	3.125	3.48261	1.80017
NM_033445.2	HIST3H2A	502	110	29	4.96379	1.4279	10.9562	2.88845	3.47629	1.79755
NM_001012661.1	SLC3A2	2438	13513	3568	125.557	36.1738	277.133	73.1747	3.47095	1.79533
NM_004843.2	IL27RA	3298	393	1249	2.69939	9.36084	5.95816	18.9357	0.288371	1.794
NM_001007593.1	SMPD1	2370	208	661	1.9881	6.89376	4.38819	13.9451	0.288392	1.7939
NM_002653.4	PITX1	2412	1297	343	12.1811	3.51496	26.8864	7.11028	3.46551	1.79307
NR_003130.2	HSP90B3P	1379	1463	387	24.0328	6.93665	53.0457	14.0319	3.46461	1.79269
NM_001806.2	CEBPG	3796	5431	1438	32.4099	9.36345	71.5358	18.941	3.46132	1.79132
NM_003370.3	VASP	2326	1035	3271	10.0799	34.7595	22.2485	70.3138	0.289989	1.78593
NM_003725.2	HSD17B6	1530	357	95	5.28568	1.53474	11.6667	3.10458	3.44402	1.78409
NM_007079.2	PTP4A3	1337	128	404	2.16872	7.46884	4.78684	15.1085	0.290369	1.78404
NM_015872.2	ZBTB7B	3675	256	807	1.578	5.42774	3.48299	10.9796	0.290728	1.78226
NR_002326.1	SNORA64	135	30	8	5.03398	1.46474	11.1111	2.96296	3.43678	1.78106
NM_001165975.1	PDE1B	3332	1322	4151	8.98774	30.7929	19.8379	62.2899	0.291877	1.77657
XM_002345507.1	LOC100292909	848	228	61	6.09064	1.77802	13.4434	3.5967	3.42552	1.77632
NM_006513.2	SARS	1966	13414	3595	154.561	45.1979	341.15	91.4293	3.41964	1.77384
NM_173174.1	PTK2B	4773	2336	7299	11.0868	37.7985	24.471	76.4613	0.293312	1.76949
XM_002343795.1	LOC100289014	859	145	450	3.82383	12.9486	8.44005	26.1932	0.295309	1.7597
XM_002348128.1	LOC100289962	859	145	450	3.82383	12.9486	8.44005	26.1932	0.295309	1.7597
NM_003383.3	VLDLR	3691	4261	1155	26.1512	7.73466	57.7215	15.6462	3.38104	1.75747
NM_203285.1	PVRL1	1568	791	215	11.4276	3.38919	25.2232	6.85587	3.37178	1.75351
NM_001038493.1	DLX1	2230	207	638	2.10276	7.07162	4.64126	14.3049	0.297352	1.74976
NM_001128602.1	RASGRP1	5004	6401	1754	28.9771	8.66394	63.9588	17.526	3.34456	1.74182
NM_001020821.1	MYADM	3249	1347	4121	9.39165	31.3513	20.7295	63.4195	0.299562	1.73908
NM_003998.3	NFKB1	4144	2615	7990	14.2947	47.6574	31.5516	96.4044	0.299948	1.73722
NM_005327.2	HADH	1953	7196	1988	83.4666	25.1604	184.229	50.8961	3.31738	1.73005
NM_001033873.1	SMAGP	1089	254	772	5.2836	17.5224	11.6621	35.4454	0.301535	1.7296
NM_001025077.2	CUGBP2	9371	8658	26282	20.9293	69.3227	46.1957	140.23	0.301912	1.7278
XM_002345623.1	LOC100291870	466	155	43	7.53477	2.28079	16.6309	4.61373	3.30358	1.72403
NM_012089.2	ABCB10	3909	3063	852	17.7503	5.38737	39.1788	10.8979	3.2948	1.72019
NM_000442.3	PECAM1	3800	1161	3503	6.92106	22.7856	15.2763	46.0921	0.303748	1.71905
NM_007110.4	TEP1	10827	1432	4316	2.99612	9.85318	6.6131	19.9317	0.304076	1.71749
NM_138609.2	H2AFY	1955	7591	22879	87.9582	289.263	194.143	585.141	0.304077	1.71749
XM_002345248.1	LOC100293130	3041	217	654	1.61647	5.31575	3.56791	10.753	0.304091	1.71743
NM_007155.5	ZP3	1512	347	97	5.19878	1.58571	11.4749	3.20767	3.27853	1.71305
NM_015187.3	SEL1L3	4621	969	2906	4.7502	15.544	10.4847	31.4434	0.305597	1.7103
NM_054035.2	UNC119	1685	510	1529	6.85637	22.429	15.1335	45.3709	0.305692	1.70985
NM_004403.2	DFNA5	2552	246	735	2.18363	7.11885	4.81975	14.4005	0.306739	1.70492
NM_001127491.1	ITGB2	2968	4637	13839	35.3914	115.251	78.1166	233.137	0.307081	1.70331
NM_006373.3	VAT1	2792	21230	5981	172.25	52.9494	380.193	107.11	3.2531	1.70181
NM_025182.2	KIAA1539	3083	420	1251	3.08603	10.0297	6.81155	20.2887	0.30769	1.70045
XM_002344593.1	LOC100292722	786	537	1594	15.4766	50.1267	34.1603	101.399	0.30875	1.69549
NM_022495.5	C14orf135	4001	3020	8963	17.0987	55.3717	37.7406	112.009	0.308798	1.69526
NM_002574.2	PRDX1	1277	3750	11123	66.5219	215.295	146.829	435.513	0.30898	1.69441
NM_021224.4	ZNF462	8409	2108	6251	5.67872	18.3742	12.5342	37.1685	0.30906	1.69404
NM_001145418.1	TTC28	11942	2466	7308	4.67778	15.126	10.3249	30.5979	0.309254	1.69314
NM_198517.2	TBC1D10C	1788	1342	3965	17.0024	54.8124	37.528	110.878	0.310192	1.68877
NM_015401.3	HDAC7	4354	2104	6213	10.9467	35.2709	24.1617	71.3482	0.31036	1.68799
NM_014747.2	RIMS3	7323	6823	1941	21.1062	6.55148	46.5861	13.2528	3.22159	1.68777
NM_005077.3	TLE1	3324	1398	399	9.52731	2.96698	21.0289	6.00181	3.21111	1.68307
NM_003407.2	ZFP36	1766	491	1443	6.29818	20.1966	13.9015	40.855	0.311843	1.68111
NM_007257.5	PNMA2	4906	2926	840	13.5105	4.23209	29.8206	8.56095	3.19239	1.67464
NM_024663.3	NPEPL1	2244	498	1457	5.02725	16.0487	11.0963	32.4643	0.31325	1.67461
NM_001146029.1	SEMA7A	3392	461	1346	3.07871	9.80827	6.7954	19.8408	0.31389	1.67167
NM_178537.4	B4GALNT4	3506	821	237	5.30463	1.67086	11.7085	3.37992	3.1748	1.66666
NM_002127.4	HLA-G	1597	135	392	1.91493	6.06714	4.22668	12.273	0.315623	1.66373
NM_004823.1	KCNK6	2704	534	1550	4.47362	14.1686	9.87426	28.6612	0.315741	1.66319
NM_001142402.1	CD164	3109	4648	13485	33.8664	107.209	74.7507	216.87	0.31589	1.6625
NM_001142467.1	HES4	1066	1926	559	40.9282	12.9616	90.3377	26.2195	3.15766	1.65886
NM_014392.3	D4S234E	3163	644	187	4.61223	1.46132	10.1802	2.95605	3.15621	1.65819
NM_001040011.1	C9orf119	1016	725	211	16.1647	5.13324	35.6791	10.3839	3.14903	1.65491
NM_014867.2	KBTBD11	6800	4536	1321	15.1108	4.80172	33.3529	9.71324	3.14696	1.65396
NM_004390.3	CTSH	1512	129	372	1.93269	6.08127	4.26587	12.3016	0.31781	1.65376
NM_012090.3	MACF1	18043	29003	83557	36.4131	114.466	80.3719	231.55	0.318113	1.65239
NM_014452.3	TNFRSF21	3707	1191	348	7.27802	2.32038	16.0642	4.69382	3.13656	1.64918
NM_018556.3	SIRPG	1741	492	1414	6.40163	20.0749	14.1298	40.6088	0.318887	1.64888
NM_001040033.1	CD53	1591	3336	9560	47.4985	148.522	104.84	300.44	0.319808	1.64472
NM_001025930.2	TTLL3	3457	1876	5361	12.293	38.3309	27.1334	77.5383	0.320707	1.64067
NM_000884.2	IMPDH2	1733	9363	2756	122.388	39.3082	270.138	79.5153	3.11356	1.63856
NM_006389.3	HYOU1	4679	24766	7295	119.902	38.5368	264.651	77.9547	3.11137	1.63755
NM_032117.2	MND1	952	940	277	22.3674	7.19194	49.3697	14.5483	3.11006	1.63694
NM_001166056.1	PEPD	1919	915	2602	10.8012	33.5147	23.8405	67.7957	0.322281	1.63361
NM_002410.3	MGAT5	2451	1245	3539	11.5067	35.6895	25.3978	72.195	0.322411	1.63303
NM_001911.2	CTSG	935	2860	846	69.2913	22.3646	152.941	45.2406	3.09825	1.63145
NM_175872.4	ZNF792	3946	408	1156	2.34222	7.24109	5.16979	14.6477	0.323462	1.62833
NM_144729.1	DUSP10	1787	139	393	1.76203	5.43589	3.8892	10.9961	0.324148	1.62528
XM_002342333.1	LOC100287439	877	81	229	2.09223	6.45415	4.61802	13.0559	0.324168	1.62519
XM_002346494.1	LOC100289807	877	81	229	2.09223	6.45415	4.61802	13.0559	0.324168	1.62519
XM_002345650.1	LOC100291561	877	81	229	2.09223	6.45415	4.61802	13.0559	0.324168	1.62519
NM_001763.2	CD1A	2137	2692	802	28.5361	9.27626	62.9855	18.7646	3.07625	1.62117
NM_031286.3	SH3BGRL3	1145	3569	10055	70.6098	217.06	155.852	439.083	0.325301	1.62015
NM_003222.3	TFAP2C	2931	1341	400	10.3642	3.37324	22.8762	6.82361	3.07249	1.61941
NM_014721.2	PHACTR2	9659	715	2012	1.67686	5.14871	3.70121	10.4152	0.325686	1.61845
NM_005628.2	SLC1A5	2908	12655	3778	98.5807	32.1122	217.589	64.9587	3.06988	1.61818
NM_005378.4	MYCN	2645	514	1440	4.40212	13.4567	9.71645	27.2212	0.327131	1.61206
NM_025157.3	PXN	3881	1851	557	10.8041	3.54744	23.8469	7.17599	3.0456	1.60672
NM_004573.2	PLCB2	4752	531	1479	2.53129	7.69298	5.58712	15.5619	0.329039	1.60367
NM_130439.3	MXI1	3513	1010	305	6.51279	2.14598	14.3752	4.34102	3.03489	1.60164
NM_030636.2	EEPD1	4745	369	1026	1.76163	5.34459	3.8883	10.8114	0.32961	1.60117
XM_002343169.1	LOC100289011	786	182	506	5.24533	15.9122	11.5776	32.1883	0.329642	1.60103
XM_002344671.1	LOC100292681	786	182	506	5.24533	15.9122	11.5776	32.1883	0.329642	1.60103
NM_005308.2	GRK5	2607	276	765	2.39824	7.2531	5.29344	14.672	0.33065	1.59662
NM_020338.3	ZMIZ1	7649	3266	9048	9.67243	29.2382	21.3492	59.145	0.330815	1.59591
NM_001017971.1	ATP6AP1L	767	211	64	6.23177	2.06247	13.7549	4.1721	3.02151	1.59527
XM_002342129.1	LOC100288427	679	360	996	12.0104	36.2571	26.5096	73.3432	0.331256	1.59398
XM_002347620.1	LOC100291180	679	360	996	12.0104	36.2571	26.5096	73.3432	0.331256	1.59398
NM_198275.1	MPZL3	995	120	332	2.73201	8.24742	6.03015	16.6834	0.331256	1.59398
XM_002342488.1	LOC100288944	724	306	93	9.5743	3.17503	21.1326	6.42265	3.0155	1.5924
XM_002346672.1	LOC100290331	724	306	93	9.5743	3.17503	21.1326	6.42265	3.0155	1.5924
NM_018240.5	KIRREL	3673	1888	574	11.6441	3.86273	25.7011	7.81378	3.01447	1.5919
XM_002345253.1	LOC100293469	1107	129	356	2.63977	7.94887	5.82656	16.0795	0.332094	1.59034
NM_001130005.1	ACTN1	3774	5316	14670	31.9086	96.0796	70.4293	194.356	0.332105	1.59029
NM_003798.2	CTNNAL1	2475	1944	592	17.7928	5.91221	39.2727	11.9596	3.00951	1.58953
XM_002343812.1	LOC100289469	1235	2412	736	44.242	14.7304	97.6518	29.7976	3.00345	1.58662
NM_006309.2	LRRFIP2	3873	2395	731	14.0082	4.66523	30.9192	9.43713	3.00268	1.58625
NM_032595.3	PPP1R9B	4121	2718	7476	14.9407	44.8404	32.9774	90.7061	0.333197	1.58555
NM_024866.4	ADM2	4299	2174	664	11.4556	3.81772	25.2849	7.72273	3.00063	1.58527
XM_002346294.1	LOC100291637	1169	2408	736	46.6623	15.562	102.994	31.4799	2.99847	1.58423
XR_078977.1	LOC345258	1728	196	538	2.56943	7.69558	5.6713	15.5671	0.333883	1.58258
NM_025079.2	ZC3H12A	2771	219	601	1.79032	5.36094	3.95164	10.8445	0.333957	1.58227
XM_002345799.1	LOC100292884	724	307	94	9.60559	3.20917	21.2017	6.49171	2.99317	1.58167
XM_002342642.1	LOC100289558	740	233	638	7.13261	21.3104	15.7432	43.1081	0.3347	1.57906
XM_002346773.1	LOC100291052	740	233	638	7.13261	21.3104	15.7432	43.1081	0.3347	1.57906
XM_002345904.1	LOC100292222	740	233	638	7.13261	21.3104	15.7432	43.1081	0.3347	1.57906
XM_002343916.1	LOC100294119	739	233	638	7.14226	21.3393	15.7645	43.1664	0.3347	1.57906
XM_002343941.1	LOC100294165	739	233	638	7.14226	21.3393	15.7645	43.1664	0.3347	1.57906
XM_002343987.1	LOC100294227	740	233	638	7.13261	21.3104	15.7432	43.1081	0.3347	1.57906
XM_002344021.1	LOC100294282	739	233	638	7.14226	21.3393	15.7645	43.1664	0.3347	1.57906
NM_001040667.2	HSF4	2654	259	708	2.21066	6.59379	4.87943	13.3384	0.335264	1.57663
XM_002342141.1	LOC100289503	1049	127	347	2.74254	8.1763	6.05338	16.5396	0.335425	1.57594
XM_002347504.1	LOC100291208	1049	127	347	2.74254	8.1763	6.05338	16.5396	0.335425	1.57594
NM_006351.2	TIMM44	1920	2033	625	23.9861	8.04603	52.9427	16.276	2.98111	1.57585
NM_198565.1	LRRC33	2519	3561	9720	32.0234	95.3764	70.6828	192.934	0.335758	1.57451
NM_005067.5	SIAH2	2664	4243	1307	36.0797	12.1267	79.6359	24.5308	2.97522	1.57299
NM_181503.2	EXOSC8	1444	1887	582	29.6025	9.96228	65.3393	20.1524	2.97146	1.57117
NM_001744.3	CAMK4	2195	3148	973	32.4881	10.9567	71.7084	22.164	2.96512	1.56809
NM_001098815.1	KIAA0748	1964	1790	4864	20.646	61.2146	45.5703	123.829	0.337272	1.56801
NM_001139468.1	TBL1X	5655	2236	693	8.95701	3.02903	19.7701	6.12732	2.95706	1.56416
NM_016293.2	BIN2	2255	1178	3180	11.8338	34.8565	26.1197	70.51	0.3395	1.55852
NM_021242.4	MID1IP1	2484	6287	1958	57.3345	19.4834	126.55	39.4122	2.94274	1.55716
NM_024308.3	DHRS11	1628	535	167	7.44429	2.53551	16.4312	5.12899	2.93602	1.55386
NM_001071775.2	C13orf37	2442	1701	531	15.7791	5.37467	34.828	10.8722	2.93583	1.55377
NR_003672.2	SNHG7	2203	838	262	8.61695	2.93961	19.0195	5.94644	2.93132	1.55155
NR_024275.1	LOC151162	5316	2577	6923	10.9813	32.1894	24.2381	65.1147	0.341147	1.55154
NM_020328.2	ACVR1B	1729	335	898	4.38908	12.8376	9.68768	25.9688	0.341892	1.54839
NM_005668.4	ST8SIA4	6409	2078	5560	7.34479	21.4431	16.2116	43.3765	0.342525	1.54572
NM_005814.1	GPA33	2827	337	899	2.7004	7.86026	5.96038	15.9002	0.343551	1.5414
NM_020700.1	PPM1H	6278	3853	10270	13.9028	40.4345	30.6865	81.7936	0.343835	1.54021
NM_014431.2	KIAA1274	4658	928	2473	4.51307	13.1228	9.96136	26.5457	0.34391	1.5399
XM_002345323.1	LOC100292264	1593	1343	3571	19.0978	55.4086	42.1532	112.084	0.344673	1.5367
NM_004343.3	CALR	1953	63792	20152	739.926	255.046	1633.18	515.924	2.90114	1.53662
XM_002342090.1	LOC100288731	1594	1343	3570	19.0859	55.3583	42.1267	111.982	0.344769	1.5363
XM_002346395.1	LOC100289795	1594	1343	3570	19.0859	55.3583	42.1267	111.982	0.344769	1.5363
NM_005030.3	PLK1	2231	5952	1885	60.4348	20.8841	133.393	42.2456	2.89383	1.53298
XM_001716393.2	LOC100129917	1057	341	108	7.30808	2.52553	16.1306	5.1088	2.89369	1.53291
NM_021103.3	TMSB10	488	5954	15789	276.384	799.72	610.041	1617.73	0.345601	1.53282
NM_033054.2	MYO1G	3354	12539	33245	84.6884	245	186.926	495.602	0.345667	1.53255
XM_002346591.1	LOC100290430	1708	618	196	8.19643	2.83642	18.0913	5.7377	2.8897	1.53092
XM_002347000.1	LOC100289899	1447	1945	617	30.4491	10.5395	67.208	21.32	2.88905	1.5306
NM_015440.3	MTHFD1L	3658	3805	1208	23.5632	8.16256	52.0093	16.5118	2.88675	1.52944
NM_024607.2	PPP1R3B	5633	3630	1154	14.5979	5.06371	32.2208	10.2432	2.88285	1.5275
NR_002605.1	DLEU1	884	442	141	11.3265	3.94248	25	7.97511	2.87292	1.52252
NM_001164276.1	ZNF44	2853	224	588	1.77857	5.09423	3.92569	10.3049	0.349134	1.51815
NM_001433.3	ERN1	4055	1655	530	9.24552	3.23064	20.4069	6.53514	2.86183	1.51694
NM_176871.2	PDLIM2	4668	434	1138	2.10612	6.0258	4.64867	12.1894	0.349517	1.51656
NM_006187.2	OAS3	6729	721	1887	2.42722	6.93145	5.35741	14.0214	0.350174	1.51385
XM_002343902.1	LOC100294103	762	855	2235	25.4176	72.4979	56.1024	146.654	0.350598	1.51211
NM_003255.4	TIMP2	3715	3085	992	18.8114	6.60018	41.5209	13.3513	2.85013	1.51103
NM_007005.3	TLE4	4808	1206	3145	5.68207	16.1681	12.5416	32.7059	0.351437	1.50866
NM_001145513.1	SCRN1	5352	4261	1373	18.0351	6.341	39.8075	12.827	2.84421	1.50803
NR_029373.1	LOC641518	1716	176	458	2.32338	6.59707	5.12821	13.345	0.352183	1.5056
NM_130759.2	GIMAP1	1263	382	994	6.85147	19.453	15.1227	39.3508	0.352207	1.5055
NM_003070.3	SMARCA2	5829	1984	5154	7.71031	21.8551	17.0184	44.21	0.352792	1.50311
NM_172208.1	TAPBP	2434	967	2509	8.99974	25.479	19.8644	51.5407	0.353221	1.50136
NM_001778.2	CD48	1112	1491	3866	30.3736	85.933	67.0414	173.831	0.353457	1.50039
NM_001122772.1	AGAP2	4981	1888	4890	8.58637	24.2658	18.952	49.0865	0.353846	1.49881
NM_020244.2	CHPT1	1586	1297	421	18.5251	6.56118	40.889	13.2724	2.82344	1.49746
NM_001122898.1	CD99	1222	7091	2306	131.45	46.6435	290.139	94.3535	2.81818	1.49477
NM_144598.2	LRRC28	1482	1363	444	20.834	7.40522	45.9852	14.9798	2.81342	1.49232
NM_001255.2	CDC20	1718	3303	1077	43.5521	15.4951	96.1292	31.3446	2.8107	1.49093
NM_006738.4	AKAP13	13468	3820	9836	6.42517	18.0517	14.1818	36.5162	0.355931	1.49033
NM_201437.1	TCEA1	2755	1884	615	15.4911	5.51768	34.1924	11.1615	2.80755	1.48931
NM_014002.2	IKBKE	3303	623	1603	4.27271	11.9958	9.43082	24.2658	0.356185	1.4893
NM_153742.3	CTH	1708	207	532	2.74541	7.69887	6.05972	15.5738	0.356599	1.48763
NM_014398.3	LAMP3	3382	2074	678	13.8918	4.95518	30.6623	10.0237	2.8035	1.48723
NM_017421.3	COQ3	1280	263	86	4.65447	1.6607	10.2734	3.35938	2.80271	1.48682
NM_032709.2	PYROXD2	2109	168	431	1.8045	5.05131	3.98293	10.2181	0.357234	1.48506
NR_001434.1	HLA-H	1109	1917	4916	39.1575	109.568	86.4292	221.641	0.357381	1.48447
NM_001040715.1	KIAA0895L	3458	1151	2951	7.54005	21.0934	16.6426	42.6692	0.35746	1.48415
NM_001606.4	ABCA2	8273	1484	3796	4.06345	11.3414	8.96894	22.9421	0.358285	1.48082
NM_022463.3	NXN	3041	1029	338	7.66519	2.74728	16.9188	5.55738	2.7901	1.48032
NM_080392.2	PTP4A2	1976	4514	1483	51.7486	18.5506	114.221	37.5253	2.7896	1.48006
NM_015392.3	NPDC1	1567	295	754	4.26459	11.8934	9.41289	24.0587	0.358568	1.47968
XM_002347046.1	LOC100289847	1029	90	230	1.9813	5.52479	4.37318	11.1759	0.358621	1.47947
XM_002346149.1	LOC100293209	1029	90	230	1.9813	5.52479	4.37318	11.1759	0.358621	1.47947
NM_052931.3	SLAMF6	2810	742	1896	5.98166	16.6777	13.2028	33.7367	0.358663	1.4793
NM_000745.2	CHRNA5	2498	344	876	3.11954	8.66792	6.88551	17.534	0.359895	1.47435
NM_001001396.1	ATP2B4	9022	7052	17932	17.7065	49.128	39.0822	99.3793	0.360416	1.47226
NM_001002844.1	ZNF280D	2191	523	173	5.40734	1.95167	11.9352	3.94797	2.77062	1.47021
NM_001131026.1	PEX5	2726	2807	929	23.326	8.42351	51.4857	17.0396	2.76916	1.46945
NM_145733.2	2014-09-04	2499	1133	375	10.2704	3.7091	22.6691	7.503	2.76898	1.46935
NM_016223.3	PACSIN3	1917	725	240	8.56722	3.09451	18.9098	6.25978	2.76852	1.46912
NM_022726.3	ELOVL4	3123	2243	744	16.2698	5.88849	35.911	11.9116	2.76298	1.46622
NM_003896.3	ST3GAL5	2426	511	1293	4.77149	13.1738	10.5317	26.6488	0.362196	1.46516
NM_004481.3	GALNT2	4518	12212	4056	61.23	22.1899	135.148	44.8871	2.75937	1.46434
NM_138991.1	BACE2	2878	876	291	6.89505	2.49922	15.2189	5.05559	2.75888	1.46408
NM_019106.5	2014-09-04	4714	1958	651	9.40908	3.41346	20.7679	6.90496	2.75647	1.46282
NM_182644.2	EPHA3	2717	3970	1320	33.0998	12.0085	73.0585	24.2915	2.75637	1.46277
NM_182697.1	UBE2H	2667	887	2240	7.53398	20.76	16.6292	41.9948	0.362908	1.46232
NM_005065.4	SEL1L	6675	10974	3652	37.2424	13.5233	82.2022	27.3558	2.75394	1.4615
NM_020909.2	EPB41L5	6649	2194	731	7.47488	2.71747	16.4987	5.49707	2.75068	1.45979
NM_015364.3	LY96	626	87	219	3.14825	8.64715	6.94888	17.492	0.364079	1.45767
NM_001080545.1	PPP1R1C	1026	209	70	4.61448	1.68637	10.1852	3.41131	2.73633	1.45224
NM_030802.3	FAM117A	2414	1005	2520	9.43089	25.8028	20.8161	52.1955	0.365499	1.45206
XM_002343477.1	LOC100289082	1153	134	336	2.63269	7.20299	5.81093	14.5707	0.365499	1.45206
NM_018957.3	SH3BP1	2624	406	1018	3.50499	9.5893	7.73628	19.3979	0.36551	1.45202
XM_002342142.1	LOC100289532	554	170	57	6.95125	2.54313	15.343	5.1444	2.73335	1.45067
XM_002347505.1	LOC100291237	554	170	57	6.95125	2.54313	15.343	5.1444	2.73335	1.45067
NM_001113434.3	C17orf51	8010	4782	1605	13.5239	4.95274	29.8502	10.0187	2.73058	1.44921
NM_000022.2	ADA	1585	26756	9031	382.398	140.835	844.038	284.89	2.71523	1.44107
XR_042100.2	LOC643911	560	945	319	38.2268	14.0801	84.375	28.4821	2.71495	1.44093
NM_014501.2	UBE2S	1222	2346	793	43.4891	16.04	95.9902	32.4468	2.71129	1.43898
NM_001002914.2	KCTD11	3119	357	887	2.59285	7.02929	5.72299	14.2193	0.368863	1.43884
NM_001145088.1	WDR67	3272	1295	3217	8.96562	24.3019	19.7891	49.1595	0.368926	1.4386
NM_032345.2	WIBG	1259	302	750	5.43382	14.7244	11.9936	29.7855	0.369034	1.43817
NM_213649.1	SFXN4	1417	881	298	14.0841	5.19816	31.0868	10.5152	2.70945	1.438
NM_030928.3	CDT1	2776	6312	2138	51.5076	19.0367	113.689	38.5086	2.7057	1.436
NM_005725.3	TSPAN2	3247	652	221	4.54872	1.68234	10.04	3.40314	2.70381	1.43499
XR_078647.1	LOC100294264	1442	621	1538	9.75552	26.363	21.5326	53.3287	0.370046	1.43422
NM_003318.3	TTK	3021	2710	921	20.3209	7.5355	44.8527	15.2433	2.69669	1.43119
NM_015398.2	FAM149A	2755	559	190	4.59636	1.70465	10.1452	3.44828	2.69637	1.43102
NR_026947.1	LOC283314	5469	550	1359	2.27813	6.14207	5.02834	12.4246	0.370906	1.43087
NM_004226.3	STK17B	5390	2530	6251	10.633	28.6658	23.4694	57.987	0.37093	1.43078
NM_001303.3	COX10	3053	752	1858	5.57975	15.0426	12.3158	30.4291	0.370931	1.43078
NM_001011516.1	PDLIM5	1965	194	479	2.23647	6.02526	4.93639	12.1883	0.371182	1.4298
NM_024897.2	PAQR6	2143	344	849	3.63631	9.79239	8.02613	19.8087	0.37134	1.42919
NM_014350.2	TNFAIP8	2040	2148	5296	23.8522	64.1683	52.6471	129.804	0.371713	1.42774
NM_178570.1	RTN4RL2	1278	516	176	9.14625	3.40396	20.1878	6.88576	2.68694	1.42596
NM_152880.2	PTK7	4180	3799	1296	20.5881	7.66358	45.4426	15.5024	2.68649	1.42572
NM_005108.3	XYLB	3729	1394	476	8.46826	3.15513	18.6913	6.38241	2.68396	1.42437
NM_022372.3	MLST8	1675	2777	949	37.5565	14.0041	82.8955	28.3284	2.68183	1.42322
NM_006633.2	IQGAP2	5841	2705	6648	10.4907	28.1324	23.1553	56.9081	0.372904	1.42312
NM_001142279.1	RNASEH2B	1632	6195	2125	85.9895	32.1841	189.798	65.1042	2.6718	1.41781
NM_003974.2	DOK2	1893	569	1393	6.80904	18.1888	15.0291	36.7934	0.374354	1.41753
XM_002345252.1	LOC100293437	619	195	67	7.13622	2.67539	15.7512	5.41195	2.66736	1.41541
NM_016337.2	EVL	1876	6640	16230	80.1788	213.84	176.972	432.569	0.374948	1.41524
NM_001987.4	ETV6	6063	2399	5859	8.96327	23.8858	19.7839	48.3177	0.375256	1.41405
NM_004348.3	RUNX2	5791	959	2341	3.75136	9.99196	8.28009	20.2124	0.375438	1.41335
NM_002053.2	GBP1	3088	425	1037	3.11771	8.3005	6.88148	16.7908	0.375605	1.41271
NM_001075099.1	SKAP1	1617	676	1647	9.47023	25.176	20.9029	50.9276	0.376161	1.41058
NM_183049.2	TMSL3	641	171	416	6.04313	16.0413	13.3385	32.4493	0.376724	1.40842
XM_927712.4	LOC440104	2369	291	707	2.78261	7.37662	6.14183	14.9219	0.37722	1.40652
NM_014765.2	TOMM20	3449	3163	1094	20.7745	7.8402	45.8539	15.8597	2.64974	1.40585
NM_001080506.1	TMEM150C	1911	209	507	2.47748	6.55768	5.46834	13.2653	0.377798	1.40431
NM_001164317.1	FLNB	9679	17108	5925	40.0399	15.1308	88.3769	30.6075	2.64626	1.40395
NM_002673.4	PLXNB1	7416	1385	3356	4.23062	11.1855	9.33792	22.6268	0.378224	1.40269
NM_021243.2	C6orf115	952	1674	4051	39.833	105.179	87.9202	212.763	0.378717	1.40081
XM_373688.4	LOC388279	928	651	226	15.8912	6.01954	35.0754	12.1767	2.63994	1.4005
NR_002767.1	NCRNA00120	925	253	88	6.19588	2.35149	13.6757	4.75676	2.63487	1.39773
NM_173217.1	ST6GAL1	3792	1765	4261	10.5439	27.7745	23.2727	56.1841	0.379624	1.39736
NM_002801.2	PSMB10	1021	1268	3055	28.1331	73.9586	62.096	149.608	0.38039	1.39445
NM_006167.3	NKX3-1	3322	2699	941	18.4046	7.00153	40.6231	14.1632	2.62866	1.39433
NM_014674.2	EDEM1	6239	40589	14164	147.373	56.1144	325.285	113.512	2.62629	1.39303
NM_002116.5	HLA-A	1557	9184	22093	133.619	350.727	294.926	709.473	0.380977	1.39223
NM_005337.4	NCKAP1L	3957	7112	17107	40.7146	106.859	89.8661	216.161	0.381012	1.39209
NM_024336.2	IRX3	2336	1801	630	17.4649	6.66608	38.5488	13.4846	2.61996	1.38954
NM_001143820.1	ETS1	5207	14459	34703	62.9035	164.734	138.842	333.234	0.38185	1.38892
NR_027032.1	LOC100130776	1586	454	1089	6.4845	16.9718	14.3127	34.3317	0.382075	1.38807
NM_006265.2	RAD21	3820	24923	8729	147.795	56.4812	326.217	114.254	2.61672	1.38776
NM_021109.3	TMSB4X	665	9488	22737	323.204	845.113	713.383	1709.55	0.382439	1.3867
NM_001145099.1	SLC2A6	2406	450	1078	4.23683	11.0746	9.35162	22.4023	0.382573	1.38619
NM_002287.3	LAIR1	2851	2105	5041	16.7255	43.7041	36.9169	88.4076	0.382698	1.38572
NM_020914.3	RNF213	13037	9454	22628	16.4271	42.9014	36.2583	86.7838	0.382904	1.38494
NM_015541.2	LRIG1	4872	551	1318	2.56194	6.68669	5.65476	13.5263	0.38314	1.38406
NM_001114.3	ADCY7	6214	2457	5867	8.9569	23.3372	19.7699	47.2079	0.383805	1.38156
NM_004761.3	RGL2	3467	758	1810	4.95267	12.9041	10.9316	26.1033	0.383806	1.38155
XM_002344905.1	LOC100292553	924	111	265	2.72129	7.08887	6.00649	14.3398	0.383882	1.38126
NM_173587.2	RCOR2	2692	730	257	6.14288	2.35972	13.5587	4.7734	2.60322	1.3803
NM_001105578.1	SYCE2	957	284	100	6.72249	2.5828	14.838	5.22466	2.60279	1.38006
NM_000946.2	PRIM1	1489	1681	592	25.5739	9.82721	56.4473	19.8791	2.60236	1.37982
NM_052838.2	2014-09-02	1654	5499	13101	75.3134	195.782	166.233	396.04	0.384681	1.37827
NM_016055.5	MRPL48	1009	1185	418	26.6043	10.2397	58.7215	20.7136	2.59814	1.37748
NM_021709.2	SIVA1	602	3761	1327	141.524	54.4851	312.375	110.216	2.59749	1.37712
NM_174945.2	ZNF575	1738	408	144	5.31783	2.04793	11.7376	4.14269	2.59668	1.37667
NM_025129.3	FUZ	1663	1133	400	15.4334	5.94526	34.0649	12.0265	2.59592	1.37624
NM_014585.5	SLC40A1	3423	641	1524	4.24204	11.0048	9.36313	22.2612	0.385473	1.3753
NR_029376.1	LOC100294362	3745	338	803	2.04451	5.29989	4.51268	10.721	0.385764	1.37421
XM_002343640.1	LOC100287690	685	537	190	17.7586	6.85592	39.1971	13.8686	2.59025	1.37309
XM_002347918.1	LOC100290163	685	537	190	17.7586	6.85592	39.1971	13.8686	2.59025	1.37309
XM_002345146.1	LOC100292709	684	537	190	17.7845	6.86595	39.2544	13.8889	2.59025	1.37309
XM_002342664.1	LOC100287481	592	209	496	7.9974	20.7092	17.652	41.8919	0.386176	1.37267
XM_002346821.1	LOC100290825	592	209	496	7.9974	20.7092	17.652	41.8919	0.386176	1.37267
XM_002345941.1	LOC100293397	592	209	496	7.9974	20.7092	17.652	41.8919	0.386176	1.37267
NM_003368.4	USP1	3998	6605	2342	37.4243	14.4793	82.6038	29.2896	2.58468	1.36999
NM_004911.4	PDIA4	3007	12869	4564	96.9472	37.5159	213.984	75.8896	2.58416	1.3697
XM_002344051.1	LOC100294496	825	856	2027	23.5041	60.7299	51.8788	122.848	0.387027	1.36949
NM_005504.5	BCAT1	8385	8204	2911	22.1639	8.58108	48.9207	17.3584	2.58288	1.36898
NM_024901.3	DENND2D	2087	249	589	2.70272	6.97583	5.9655	14.1112	0.387441	1.36795
NM_020856.2	TSHZ3	5057	635	1502	2.84449	7.34142	6.27843	14.8507	0.387458	1.36789
XR_078642.1	LOC100294179	1415	154	364	2.46541	6.3584	5.4417	12.8622	0.38774	1.36684
NM_002199.3	IRF2	2330	772	1824	7.5056	19.3496	16.5665	39.1416	0.387894	1.36626
NM_015660.2	GIMAP2	1542	983	2318	14.4409	37.1563	31.8742	75.1621	0.388652	1.36345
NM_001030288.1	SPN	7001	8254	19444	26.7072	68.6481	58.9487	138.866	0.389045	1.36199
NM_015293.2	SYNE1	10970	1743	4105	3.59927	9.24931	7.94439	18.7101	0.389139	1.36164
NM_004720.5	LPAR2	1825	272	640	3.37621	8.66802	7.45205	17.5342	0.389502	1.3603
NM_002232.3	KCNA3	3387	1257	449	8.40706	3.27668	18.5562	6.62828	2.56572	1.35937
NM_145905.2	HMGA1	1910	4082	1459	48.4132	18.881	106.859	38.1937	2.56412	1.35847
NM_025049.2	PIF1	2692	723	259	6.08397	2.37809	13.4287	4.81055	2.55835	1.35521
NM_004577.3	PSPH	2168	870	312	9.09042	3.55712	20.0646	7.19557	2.55556	1.35364
NM_017554.2	PARP14	7809	1781	4168	5.16645	13.1927	11.4035	26.6872	0.391613	1.3525
NM_032832.5	LRP11	3663	1489	535	9.20835	3.61011	20.3249	7.30276	2.55071	1.3509
NM_022780.3	RMND5A	6278	9813	3529	35.4083	13.8942	78.1539	28.1061	2.54842	1.3496
NM_005022.2	PFN1	857	20272	47323	535.846	1364.88	1182.73	2760.97	0.392596	1.34888
NM_015292.1	ESYT1	4242	4373	10206	23.3525	59.4686	51.5441	120.297	0.392686	1.34855
NR_023349.1	TSEN15	2116	1524	549	16.3152	6.41298	36.0113	12.9726	2.5441	1.34715
NM_014718.3	CLSTN3	4079	2782	6485	15.45	39.297	34.1015	79.4925	0.393159	1.34682
NM_014734.3	KIAA0247	5460	1020	2377	4.23186	10.7607	9.34066	21.7674	0.393271	1.3464
NM_024898.2	DENND1C	2839	1583	3685	12.6311	32.083	27.8795	64.8996	0.393699	1.34483
XM_002347275.1	LOC100294365	577	83	193	3.25856	8.2677	7.19237	16.7244	0.394132	1.34325
NM_001039362.1	ATP6V1C2	3290	3725	1346	25.6481	10.1124	56.6109	20.4559	2.53631	1.34273
XM_002344362.1	LOC100287198	1606	206	478	2.90567	7.35674	6.41345	14.8817	0.394967	1.3402
XM_002346910.1	LOC100291071	1606	206	478	2.90567	7.35674	6.41345	14.8817	0.394967	1.3402
NM_033027.3	CSRNP1	3227	476	1104	3.34143	8.45616	7.37527	17.1057	0.395147	1.33954
XM_002343610.1	LOC100289128	574	237	86	9.35321	3.70331	20.6446	7.49129	2.52564	1.33665
XM_002347861.1	LOC100290832	574	237	86	9.35321	3.70331	20.6446	7.49129	2.52564	1.33665
XM_002345115.1	LOC100293286	574	237	86	9.35321	3.70331	20.6446	7.49129	2.52564	1.33665
NM_000700.1	ANXA1	1416	771	1784	12.3343	31.1411	27.2246	62.9944	0.396078	1.33614
NM_001161407.1	NDFIP2	4663	463	1071	2.24926	5.67711	4.96462	11.484	0.396198	1.33571
NM_006471.2	MYL12A	1258	3388	7833	61.008	153.904	134.658	311.328	0.396402	1.33496
NM_002229.2	JUNB	1854	564	1303	6.89118	17.3715	15.2104	35.1402	0.396694	1.3339
NM_001077203.1	SENP7	4798	1416	3271	6.68539	16.8509	14.7561	34.0871	0.396738	1.33374
NM_001135101.1	CRELD2	1594	2078	756	29.5312	11.7229	65.1819	23.7139	2.5191	1.33291
NM_002737.2	PRKCA	8896	17257	6279	43.9435	17.4461	96.993	35.2911	2.51881	1.33274
NM_002736.2	PRKAR2B	3723	838	305	5.09888	2.02493	11.2544	4.09616	2.51805	1.33231
NM_015544.2	TMEM98	1830	379	138	4.6915	1.86394	10.3552	3.77049	2.51699	1.3317
NM_001039936.1	CHN2	2878	479	1104	3.77024	9.48159	8.32175	19.18	0.397638	1.33047
NM_001142465.1	ECSIT	1074	877	320	18.4978	7.36459	40.8287	14.8976	2.51172	1.32867
NM_145806.2	ZNF511	1111	852	311	17.372	6.9191	38.3438	13.9964	2.51073	1.32811
XM_002344110.1	LOC100289223	601	100	230	3.7692	9.45924	8.31947	19.1348	0.398468	1.32747
XM_002347660.1	LOC100290360	601	100	230	3.7692	9.45924	8.31947	19.1348	0.398468	1.32747
NM_014330.3	PPP1R15A	2428	2507	916	23.39	9.32502	51.6269	18.8633	2.5083	1.32671
NM_000660.4	TGFB1	2244	2407	5532	24.2984	60.9344	53.6319	123.262	0.398763	1.3264
NM_003498.4	SNN	3348	941	2162	6.3669	15.9615	14.0532	32.2879	0.398892	1.32593
NM_000203.3	IDUA	2230	317	728	3.22017	8.06918	7.10762	16.3229	0.39907	1.32529
NM_017458.2	MVP	2892	385	884	3.01569	7.55539	6.65629	15.2835	0.399144	1.32502
NM_007124.2	UTRN	12591	4189	9616	7.53658	18.8772	16.6349	38.186	0.399243	1.32466
NM_014059.2	C13orf15	1140	639	234	12.6976	5.07357	28.0263	10.2632	2.50268	1.32348
NM_005192.3	CDKN3	917	1516	556	37.4502	14.9868	82.6609	30.3162	2.49888	1.32128
NM_001165031.1	DTYMK	1169	319	117	6.18159	2.47386	13.6441	5.00428	2.49877	1.32122
NM_007280.1	OIP5	1264	504	185	9.03249	3.61766	19.9367	7.31804	2.49678	1.32007
NM_005013.2	NUCB2	1632	18099	6648	251.222	100.687	554.504	203.676	2.49508	1.31909
NM_199334.2	THRA	2435	833	306	7.74944	3.10617	17.1047	6.28337	2.49485	1.31895
NM_001077397.1	IRF2BP2	4686	9375	3445	45.3203	18.1715	100.032	36.7584	2.49404	1.31848
NR_024240.1	HLA-J	1599	348	795	4.93009	12.2891	10.8818	24.8593	0.401174	1.3177
NM_004968.2	ICA1	2425	218	498	2.03643	5.07599	4.49485	10.268	0.401188	1.31765
NM_181784.2	SPRED2	4512	1408	3216	7.06899	17.6177	15.6028	35.6383	0.401243	1.31745
NM_006634.2	VAMP5	702	794	1813	25.6217	63.8357	56.5527	129.131	0.401369	1.317
NM_002444.2	MSN	4030	18670	42627	104.945	261.446	231.638	528.871	0.401403	1.31688
NM_002162.3	ICAM3	1818	2870	6535	35.7612	88.8494	78.9329	179.73	0.402492	1.31297
NM_016457.4	PRKD2	3662	2994	6813	18.5207	45.9857	40.8793	93.0229	0.402749	1.31205
NM_001114099.1	SEZ6L2	3361	354	805	2.38594	5.92012	5.26629	11.9756	0.403022	1.31107
NM_001008393.2	C4orf46	3569	1799	666	11.4185	4.61244	25.2031	9.33034	2.47559	1.30777
NM_001136503.1	C19orf77	919	627	1422	15.4553	38.2461	34.1132	77.3667	0.4041	1.30722
NM_003608.2	GPR65	1809	415	941	5.19677	12.8574	11.4704	26.0088	0.404184	1.30691
NM_005608.2	PTPRCAP	928	3960	8978	96.6654	239.13	213.362	483.728	0.404238	1.30672
NM_001928.2	CFD	1187	394	146	7.51916	3.04022	16.5965	6.14996	2.47323	1.3064
NM_005219.4	DIAPH1	5876	15036	34076	57.9662	143.341	127.944	289.959	0.404394	1.30617
NM_024623.1	OGFOD2	2105	947	351	10.1911	4.12153	22.4941	8.33729	2.47266	1.30606
NM_152296.3	ATP1A3	3631	8938	3313	55.762	22.5527	123.079	45.621	2.47252	1.30598
NM_152426.3	APOBEC3D	2550	297	673	2.6384	6.52346	5.82353	13.1961	0.404448	1.30597
NM_005412.4	SHMT2	2139	12691	4707	134.403	54.3922	296.657	110.028	2.471	1.30509
XR_038981.2	LOC100131044	1024	315	117	6.96843	2.82416	15.3809	5.71289	2.46743	1.30301
NM_007260.2	LYPLA2	1668	280	633	3.80265	9.38017	8.39329	18.9748	0.405392	1.30261
XM_002342220.1	LOC100289180	564	50	113	2.00824	4.95225	4.43262	10.0177	0.40552	1.30215
XM_002348196.1	LOC100291324	564	50	113	2.00824	4.95225	4.43262	10.0177	0.40552	1.30215
XM_002345522.1	LOC100293431	564	50	113	2.00824	4.95225	4.43262	10.0177	0.40552	1.30215
NM_199249.1	C19orf48	1713	5203	1934	68.8051	27.9063	151.868	56.4507	2.46558	1.30192
NM_004184.3	WARS	2920	4335	1613	33.6303	13.6538	74.2295	27.6199	2.46306	1.30045
NM_018378.2	FBXL8	1638	261	589	3.60953	8.88801	7.96703	17.9792	0.406112	1.30005
NM_023072.2	ZSWIM4	4393	966	2179	4.98127	12.2602	10.9948	24.8008	0.406294	1.2994
NM_014508.2	APOBEC3C	1141	276	622	5.47958	13.4743	12.0947	27.2568	0.406668	1.29808
NM_005239.4	ETS2	3717	5144	1918	31.3496	12.7544	69.1956	25.8004	2.45795	1.29746
NM_032270.4	LRRC8C	7297	1285	2891	3.98917	9.7928	8.80499	19.8095	0.407358	1.29563
NM_001048226.1	DBNDD2	1282	1114	416	19.6844	8.02063	43.4477	16.2246	2.45422	1.29526
NM_001161766.1	AHCY	2404	6132	2290	57.7819	23.5453	127.537	47.629	2.45407	1.29518
XM_001725398.1	LOC100131436	1647	215	483	2.95712	7.24864	6.52702	14.663	0.407955	1.29352
XM_002346935.1	LOC100290084	771	262	98	7.69788	3.14177	16.9909	6.35538	2.45017	1.29288
NM_172057.1	KCNH2	3230	1050	2356	7.36395	18.0292	16.2539	36.4706	0.408446	1.29178
NM_001034996.1	RPL14	947	6160	2307	147.352	60.2144	325.238	121.806	2.44711	1.29108
NM_002117.4	HLA-C	1562	6953	15564	100.836	246.288	222.567	498.207	0.409423	1.28834
NM_005801.3	EIF1	1342	14123	5300	238.396	97.6172	526.192	197.466	2.44215	1.28815
NM_020153.2	C11orf60	1856	897	337	10.9481	4.48802	24.1649	9.07866	2.4394	1.28653
NM_001008566.1	TPST2	2043	544	1216	6.03191	14.7119	13.3138	29.7602	0.410002	1.2863
NM_004461.2	FARSA	1876	7056	2652	85.202	34.9417	188.06	70.6823	2.43841	1.28594
NM_014975.2	MAST1	4994	1092	411	4.95334	2.03421	10.9331	4.11494	2.43502	1.28393
NM_001225.3	CASP4	1335	122	272	2.07015	5.03606	4.56929	10.1873	0.411066	1.28256
NM_001166103.1	SPINT2	1666	1178	2626	16.0175	38.9603	35.3541	78.8115	0.411123	1.28236
NR_026762.1	C10orf75	1015	260	98	5.80272	2.38651	12.8079	4.82759	2.43147	1.28183
NM_001984.1	ESD	1223	5183	1956	96.0017	39.5317	211.897	79.9673	2.42847	1.28005
NM_005990.3	STK10	6114	1997	4442	7.39906	17.9579	16.3314	36.3265	0.412022	1.27921
NM_001130848.1	PITPNM1	4298	2280	5069	12.0169	29.1514	26.524	58.9693	0.412224	1.2785
NM_052864.2	TIFA	3128	1447	547	10.4791	4.32239	23.1298	8.74361	2.42439	1.27762
NM_013355.3	PKN3	3427	1166	441	7.70741	3.18074	17.012	6.4342	2.42315	1.27689
NM_006303.3	AIMP2	1251	1898	720	34.3687	14.2258	75.8593	28.777	2.41593	1.27258
NM_130807.2	MOBKL2A	3388	2455	5431	16.4147	39.6223	36.2308	80.1505	0.414279	1.27133
XM_002343588.1	LOC100287062	1007	397	878	8.93069	21.551	19.712	43.5948	0.414397	1.27091
NM_005230.2	ELK3	2207	261	577	2.67894	6.46214	5.913	13.072	0.414558	1.27035
NM_148674.3	SMC1B	4319	1055	401	5.53342	2.2949	12.2135	4.64228	2.41118	1.26974
NM_020954.2	KIAA1618	5396	2188	4834	9.18543	22.1431	20.2743	44.7924	0.414822	1.26944
NM_003780.3	B4GALT2	2254	676	257	6.79386	2.81827	14.9956	5.70098	2.41065	1.26942
NM_002348.2	LY9	2517	407	899	3.66299	8.82835	8.08502	17.8586	0.414912	1.26912
NM_003045.4	SLC7A1	7448	15122	5752	45.9932	19.089	101.517	38.6144	2.40941	1.26868
NM_013974.1	DDAH2	1367	949	2093	15.7261	37.8446	34.711	76.5545	0.415545	1.26692
NM_016304.2	RSL24D1	1505	1882	717	28.3274	11.7757	62.5249	23.8206	2.40559	1.26639
NM_014598.1	SOCS7	2189	1572	599	16.2679	6.7637	35.9068	13.682	2.40518	1.26614
NM_001102426.1	TBC1D8	4215	1506	574	8.09378	3.36602	17.8648	6.80902	2.40455	1.26577
NR_002219.1	EPR1	1302	2907	1108	50.5776	21.0345	111.636	42.5499	2.40451	1.26574
NM_016817.2	OAS2	3583	595	1310	3.76179	9.03707	8.3031	18.2808	0.416262	1.26444
NM_001943.3	DSG2	5747	4729	1805	18.6403	7.76317	41.1432	15.7038	2.40112	1.26371
NM_020647.2	JPH1	4427	1024	391	5.2398	2.18308	11.5654	4.41608	2.40018	1.26314
NM_002167.3	ID3	1304	487	1071	8.4601	20.3009	18.6733	41.066	0.416736	1.2628
NM_003760.3	EIF4G3	6282	3023	6648	10.9009	26.1575	24.0608	52.9131	0.416743	1.26277
NM_002738.6	PRKCB	8114	3410	7496	9.52014	22.8348	21.0131	46.1918	0.416913	1.26218
NM_016270.2	KLF2	1675	738	282	9.98081	4.16138	22.0299	8.41791	2.39844	1.26209
NM_018492.2	PBK	1922	1334	510	15.7227	6.55873	34.7034	13.2674	2.39721	1.26136
NR_024031.1	KIAA0114	865	2442	935	63.9519	26.7177	141.156	54.0462	2.39362	1.25919
NM_001127218.1	POLD2	1811	5144	1970	64.3438	26.8875	142.021	54.3898	2.39307	1.25886
NM_053064.3	GNG2	3923	3010	6599	17.3809	41.5779	38.3635	84.1066	0.418032	1.25832
NR_028393.1	TSNAX-DISC1	7778	1022	2237	2.97651	7.10888	6.56981	14.3803	0.418703	1.256
NM_001080391.1	SP100	5523	1363	2982	5.59043	13.3455	12.3393	26.9962	0.418899	1.25533
NM_014000.2	VCL	5717	790	1728	3.13028	7.471	6.90922	15.1128	0.418991	1.25501
NM_004055.4	CAPN5	4447	608	1329	3.09714	7.38688	6.83607	14.9427	0.419276	1.25403
NM_153374.2	LYSMD2	1730	366	800	4.79247	11.43	10.578	23.1214	0.419288	1.25399
XM_002344785.1	LOC100293413	4112	1085	2371	5.97724	14.2522	13.1931	28.8303	0.419391	1.25363
NM_001166171.1	NEK6	2793	357	780	2.89548	6.90282	6.39098	13.9635	0.419464	1.25338
NM_000232.4	SGCB	4348	1269	488	6.61144	2.77417	14.5929	5.61178	2.38321	1.25291
NM_001142595.1	P4HA1	2989	3226	1241	24.4491	10.2624	53.9645	20.7595	2.38239	1.25241
XM_002345601.1	LOC100293268	1023	5448	2096	120.638	50.6429	266.276	102.444	2.38214	1.25226
NM_017816.2	LYAR	1603	1389	535	19.6288	8.24942	43.325	16.6875	2.37941	1.2506
XR_079127.1	LOC100289862	1023	5375	2071	119.022	50.0389	262.708	101.222	2.37859	1.25011
NM_182557.2	BCL9L	7836	928	2021	2.68273	6.37492	5.92139	12.8956	0.420826	1.2487
NM_005742.2	PDIA6	2373	12097	4668	115.479	48.6224	254.888	98.3565	2.37502	1.24794
NM_182664.2	RASSF5	3565	3584	7801	22.7736	54.0871	50.2665	109.411	0.421055	1.24792
NM_001015053.1	HDAC5	5393	1370	2981	5.75459	13.6626	12.7017	27.6377	0.421192	1.24745
NR_028406.1	FXYD5	1628	1446	3144	20.1205	47.7344	44.4103	96.5602	0.421509	1.24636
NM_002080.2	GOT2	2503	4495	1737	40.6811	17.1531	89.7922	34.6984	2.37165	1.24589
NM_018990.3	SASH3	2740	6572	14263	54.3339	128.666	119.927	260.274	0.422287	1.2437
NM_022736.1	MFSD1	2188	460	998	4.7625	11.2742	10.5119	22.8062	0.422424	1.24324
NM_001794.2	CDH4	3101	1099	2383	8.02823	18.9944	17.7201	38.4231	0.422663	1.24242
NM_006506.2	RASA2	2624	1060	2298	9.15095	21.6466	20.1982	43.7881	0.422743	1.24215
NM_170696.1	ALDH1A2	3325	16332	35393	111.268	263.105	245.594	532.226	0.422905	1.24159
NM_032593.2	HINT2	660	1244	483	42.6973	18.0887	94.2424	36.5909	2.36045	1.23906
NM_001142761.1	C15orf23	2064	2116	822	23.2236	9.84385	51.2597	19.9128	2.3592	1.2383
NM_001012271.1	BIRC5	2758	4339	1687	35.6385	15.119	78.6621	30.5838	2.3572	1.23707
NM_015201.3	BOP1	2452	1706	664	15.761	6.69346	34.7879	13.54	2.35468	1.23553
NM_152407.3	GRPEL2	4156	1590	619	8.66654	3.68144	19.129	7.44706	2.35411	1.23518
NM_020400.5	LPAR5	2890	301	649	2.35935	5.55073	5.20761	11.2284	0.425053	1.23429
NM_001080157.1	ARHGAP9	2636	829	1787	7.12415	16.7565	15.7246	33.8961	0.425159	1.23393
NM_019000.3	FAM134B	3146	1688	658	12.1545	5.16976	26.8277	10.4577	2.35108	1.23332
NM_001166108.1	PALLD	5943	2909	1134	11.0882	4.7164	24.4742	9.54064	2.35099	1.23327
NM_145169.1	SFT2D1	725	1213	2612	37.9007	89.0509	83.6552	180.138	0.425607	1.23241
NM_003146.2	SSRP1	2860	20840	8132	165.065	70.2804	364.336	142.168	2.34867	1.23184
NM_005921.1	MAP3K1	7616	1564	3365	4.65194	10.921	10.2679	22.0916	0.425964	1.2312
XM_002343955.1	LOC100294184	586	225	484	8.69779	20.4151	19.198	41.2969	0.426048	1.23091
XM_002343980.1	LOC100294220	586	225	484	8.69779	20.4151	19.198	41.2969	0.426048	1.23091
XM_002344041.1	LOC100294312	586	225	484	8.69779	20.4151	19.198	41.2969	0.426048	1.23091
NM_001024649.1	CANX	4961	31177	12185	142.36	60.7099	314.221	122.808	2.34493	1.22954
NM_006355.2	TRIM38	3327	828	1779	5.63769	13.2168	12.4436	26.7358	0.426555	1.2292
XM_002343979.1	LOC100294219	1323	162	348	2.77383	6.50163	6.12245	13.1519	0.426635	1.22892
XM_002344040.1	LOC100294311	1323	162	348	2.77383	6.50163	6.12245	13.1519	0.426635	1.22892
NM_001767.3	CD2	1614	716	1538	10.0492	23.5535	22.1809	47.6456	0.426656	1.22886
NR_015370.1	C5orf26	683	1258	492	41.7238	17.8052	92.0937	36.0176	2.34335	1.22857
NM_001123168.1	FAM72A	1904	450	176	5.35389	2.2848	11.8172	4.62185	2.34326	1.22852
NM_198445.2	RINL	3058	327	702	2.42234	5.67417	5.34663	11.4781	0.426905	1.22801
NM_004701.2	CCNB2	1549	3902	1527	57.0637	24.3664	125.952	49.2899	2.3419	1.22768
NM_198433.1	AURKA	2585	1895	742	16.6063	7.0949	36.6538	14.352	2.3406	1.22688
NM_015602.2	TOR1AIP1	3871	1973	4227	11.5459	26.9906	25.4844	54.5983	0.427775	1.22507
NM_005201.3	CCR8	1505	211	452	3.17592	7.42344	7.00997	15.0166	0.427824	1.22491
NR_027639.1	ADAM9	3960	1055	414	6.03506	2.58409	13.3207	5.22727	2.33546	1.22371
NM_001163547.1	SYNRG	7657	3711	7943	10.9788	25.6406	24.2327	51.8676	0.428181	1.22371
NM_016292.2	TRAP1	2338	5787	2271	56.0703	24.0091	123.76	48.5672	2.33538	1.22366
NM_000597.2	IGFBP2	1456	11926	4682	185.549	79.4828	409.547	160.783	2.33445	1.22308
XM_001715330.2	FLJ46358	692	140	55	4.58296	1.96453	10.1156	3.97399	2.33285	1.22209
NM_152862.1	ARPC2	1480	9591	20503	146.8	342.42	324.02	692.669	0.428714	1.22191
NM_194278.3	C14orf43	8201	2307	4929	6.37243	14.8558	14.0654	30.0512	0.428953	1.22111
NM_016606.2	REEP2	2143	852	335	9.0062	3.8639	19.8787	7.81615	2.33086	1.22086
NM_005475.2	SH2B3	5492	1211	2585	4.99502	11.6341	11.0251	23.5342	0.429343	1.2198
NM_032359.2	C3orf26	1241	1514	596	27.6362	11.8707	60.9992	24.0129	2.32809	1.21915
NM_006464.2	TGOLN2	6424	6433	13714	22.6846	52.7669	50.07	106.74	0.429903	1.21792
NM_025160.5	WDR26	6685	3963	8448	13.4291	31.236	29.641	63.1862	0.429924	1.21785
NM_005419.2	STAT2	4506	1282	2730	6.44497	14.9753	14.2255	30.2929	0.430374	1.21634
NM_001805.2	CEBPE	1265	920	363	16.4748	7.09282	36.3636	14.3478	2.32275	1.21583
NM_207446.2	FAM174B	2662	874	345	7.43751	3.20342	16.4162	6.48009	2.32174	1.21521
NM_001078177.1	SLC29A1	2534	2849	1125	25.4689	10.9736	56.2155	22.1981	2.32092	1.2147
NM_181716.2	CENPV	1195	2865	1133	54.3101	23.435	119.874	47.4059	2.31748	1.21256
NM_152549.2	CCDC112	2583	561	222	4.91997	2.12438	10.8595	4.29733	2.31596	1.21161
NM_018273.2	TMEM143	2293	750	297	7.40937	3.20151	16.3541	6.47623	2.31433	1.2106
NM_003223.2	TFAP4	2173	971	385	10.1224	4.37929	22.3424	8.85872	2.31142	1.20878
NM_004529.2	MLLT3	3481	880	349	5.72668	2.47813	12.64	5.01293	2.31088	1.20845
NM_001014438.1	CARS	2849	5644	2239	44.8765	19.4252	99.0523	39.2945	2.31022	1.20803
NM_001081563.1	DMPK	3301	677	1433	4.64587	10.7301	10.2545	21.7055	0.432976	1.20764
NM_024578.1	OCEL1	1138	151	319	3.00579	6.92869	6.63445	14.0158	0.433818	1.20484
XM_001714069.2	LOC727967	2152	1167	464	12.2844	5.32941	27.1143	10.7807	2.30502	1.20478
NM_003885.2	CDK5R1	3918	885	352	5.11685	2.22066	11.294	4.49209	2.30421	1.20427
NM_080588.1	PTPN7	3303	6520	13766	44.716	103.015	98.6982	208.386	0.434071	1.204
XM_002343455.1	LOC100288205	1105	108	228	2.21404	5.10006	4.88688	10.3167	0.43412	1.20383
XM_002347637.1	LOC100290812	1105	108	228	2.21404	5.10006	4.88688	10.3167	0.43412	1.20383
XM_002343212.1	LOC100287812	2636	271	572	2.32888	5.36357	5.14036	10.8498	0.434204	1.20355
NM_001080519.2	BAHCC1	10471	8325	3314	18.0103	7.82289	39.7527	15.8247	2.30225	1.20305
NM_001040099.1	MOSPD3	1197	355	749	6.71828	15.4665	14.8287	31.2865	0.434378	1.20298
NM_001122835.1	TTC13	3173	938	1979	6.69664	15.4162	14.781	31.185	0.434388	1.20294
NM_144618.2	GABPB2	1977	899	358	10.3009	4.47589	22.7365	9.05412	2.30143	1.20253
NM_016328.1	GTF2IRD1	3489	1464	583	9.50526	4.1302	20.9802	8.35483	2.30141	1.20252
NM_001031848.1	SERPINB8	1426	369	778	5.8618	13.4854	12.9383	27.2791	0.434678	1.20198
NM_145759.2	TRAF5	4037	1233	2599	6.91876	15.9129	15.2712	32.1897	0.434788	1.20162
NM_001040280.1	CD83	2505	663	1396	5.99556	13.7747	13.2335	27.8643	0.43526	1.20005
NM_005526.2	HSF1	2193	2088	833	21.5683	9.38878	47.606	18.9922	2.29724	1.1999
NM_001084.4	PLOD3	3032	461	970	3.44426	7.90762	7.60224	15.996	0.435562	1.19905
NM_002751.5	MAPK11	2450	848	1784	7.84068	17.9983	17.3061	36.4082	0.435634	1.19881
NM_018159.3	NUDT11	2443	701	280	6.50008	2.83294	14.3471	5.73066	2.29446	1.19816
NM_183356.2	ASNS	2433	3000	1199	27.9321	12.1809	61.6523	24.6404	2.2931	1.1973
NM_004335.2	BST2	995	512	1076	11.6566	26.7296	25.7286	54.0704	0.436093	1.19729
NM_016166.1	PIAS1	2337	1311	2753	12.7077	29.1173	28.0488	58.9003	0.436433	1.19617
NM_002012.2	FHIT	1116	405	162	8.22081	3.58801	18.1452	7.25806	2.29119	1.1961
NM_201444.2	DGKA	2836	3383	7101	27.0221	61.8894	59.6439	125.194	0.43662	1.19555
XM_002343771.1	LOC100288030	1444	1561	3275	24.4884	56.0592	54.0512	113.4	0.43683	1.19486
XM_001716106.1	LOC652346	2696	706	1481	5.93211	13.5781	13.0935	27.4666	0.436889	1.19466
NM_022126.2	LHPP	1633	619	248	8.58674	3.75378	18.9528	7.59339	2.28749	1.19377
NM_017425.3	SPA17	966	242	97	5.67495	2.48198	12.5259	5.0207	2.28647	1.19312
NM_002872.3	RAC2	1534	8502	17808	125.551	286.941	277.119	580.443	0.437549	1.19248
NM_053024.3	PFN2	2143	2608	1046	27.5683	12.0646	60.8493	24.405	2.28506	1.19223
NM_015175.1	NBEAL2	8953	4255	8901	10.766	24.5739	23.763	49.7096	0.438109	1.19064
NM_138402.4	SP140L	2701	840	1755	7.04496	16.0604	15.5498	32.488	0.438655	1.18884
NM_178148.2	SLC35B2	2084	856	1788	9.30465	21.2067	20.5374	42.8983	0.43876	1.1885
NM_001105669.1	TTC24	1629	417	871	5.79881	13.216	12.7993	26.7342	0.438772	1.18846
NM_031459.3	SESN2	3546	2801	1127	17.8936	7.85576	39.4952	15.8911	2.27777	1.18762
NM_002826.4	QSOX1	3357	1701	3545	11.4783	26.1016	25.3351	52.8001	0.439753	1.18523
NM_024565.5	CCNJL	3314	543	1131	3.71169	8.43554	8.19252	17.064	0.440006	1.18441
NM_005126.4	NR1D2	5333	2361	955	10.0288	4.42624	22.1358	8.95368	2.26576	1.17999
NM_014572.2	LATS2	5627	773	1605	3.11191	7.0502	6.86867	14.2616	0.441393	1.17986
NM_004282.3	BAG2	2093	949	384	10.2712	4.53487	22.6708	9.17344	2.26494	1.17947
NR_003189.1	SYS1-DBNDD2	1346	1374	556	23.1241	10.2102	51.0401	20.6538	2.26482	1.17939
NM_015950.3	MRPL2	1308	1423	576	24.6446	10.8847	54.396	22.0183	2.26414	1.17896
XM_001132642.3	LOC730144	416	898	364	48.8998	21.6277	107.933	43.75	2.26098	1.17695
NM_002610.3	PDK1	4633	2348	952	11.4805	5.07899	25.34	10.2741	2.26038	1.17657
NM_021574.2	BCR	6879	5216	10804	17.1766	38.8206	37.9125	78.5289	0.44246	1.17638
NM_001142679.1	ANO6	3635	3665	1487	22.8399	10.1114	50.4127	20.4539	2.25883	1.17558
XM_002344006.1	LOC100294271	1125	131	271	2.63781	5.95415	5.82222	12.0444	0.44302	1.17456
NM_001143919.2	LTB4R	2757	655	1355	5.38181	12.148	11.8789	24.5738	0.44302	1.17456
NM_000980.2	RPL18A	625	1804	733	65.3854	28.9886	144.32	58.64	2.25556	1.17348
NM_002688.4	2014-09-06	3569	3105	1262	19.7078	8.74009	43.4996	17.68	2.25488	1.17305
NR_001593.1	RPL18AP3	623	1788	727	65.0135	28.8436	143.499	58.3467	2.254	1.17249
NM_024625.3	ZC3HAV1	3258	3766	7774	26.185	58.9789	57.7962	119.306	0.443973	1.17146
NR_002599.1	SNHG6	477	3967	1615	188.394	83.6868	415.828	169.287	2.25118	1.17068
NM_003981.2	PRC1	3167	6112	2489	43.7179	19.4258	96.4951	39.2959	2.2505	1.17025
XR_017601.2	LOC391334	1231	214	441	3.93804	8.8549	8.69212	17.9123	0.44473	1.169
NM_002221.3	ITPKB	6239	1855	3822	6.73524	15.1418	14.8662	30.6299	0.44481	1.16874
NM_001085428.1	ARSA	1702	419	863	5.57672	12.533	12.309	25.3525	0.444963	1.16824
NM_002558.2	P2RX1	2946	304	626	2.33757	5.25224	5.15954	10.6246	0.445062	1.16792
NM_001261.3	CDK9	2502	2679	5514	24.2555	54.4731	53.5372	110.192	0.445274	1.16724
NM_002227.2	JAK1	5116	3790	7796	16.7816	37.6655	37.0407	76.1923	0.445542	1.16637
NM_012446.2	SSBP2	1972	4613	1885	52.9908	23.6269	116.962	47.7941	2.24281	1.16531
XM_002342215.1	LOC100288550	1068	9238	3778	195.943	87.4367	432.491	176.873	2.24098	1.16413
NM_016483.4	PHF7	2318	907	371	8.86376	3.95607	19.5643	8.00259	2.24055	1.16385
NM_001032290.1	PSRC1	1850	1127	461	13.7999	6.15931	30.4595	12.4595	2.2405	1.16382
XM_002348192.1	LOC100290887	1069	9308	3808	197.244	88.0486	435.36	178.11	2.24017	1.16361
XM_001724769.2	LOC100134253	1071	9306	3808	196.833	87.8841	434.454	177.778	2.23969	1.1633
NM_145321.1	OSBPL3	6704	1575	3232	5.32195	11.9163	11.7467	24.105	0.446612	1.16291
NM_022809.2	CDC25C	1919	662	271	7.81461	3.49058	17.2486	7.06097	2.23877	1.16271
NM_003898.2	SYNJ2	6822	1148	2355	3.81201	8.53262	8.41395	17.2603	0.446758	1.16244
NM_017840.3	MRPL16	1210	1742	3573	32.6127	72.9879	71.9835	147.645	0.446824	1.16222
XR_015513.3	LOC729342	1208	549	225	10.2951	4.60382	22.7235	9.31291	2.2362	1.16105
NM_013376.3	SERTAD1	1228	148	303	2.73016	6.09884	6.02606	12.3371	0.447652	1.15955
NM_003486.5	SLC7A5	4599	38367	15741	188.981	84.6003	417.123	171.135	2.23381	1.15951
NM_199242.2	UNC13D	4461	3667	7507	18.621	41.5946	41.1007	84.1403	0.447678	1.15947
NM_152318.2	C12orf45	629	436	179	15.7022	7.03405	34.6582	14.2289	2.23231	1.15854
NM_024333.2	FSD1	1888	777	319	9.32273	4.1763	20.5773	8.44809	2.23229	1.15853
NM_004924.3	ACTN4	3941	4632	9473	26.6248	59.4134	58.7668	120.185	0.448128	1.15802
NM_001163280.1	HTATSF1	3074	4288	8764	31.5991	70.4696	69.7463	142.55	0.448408	1.15712
NM_016531.5	KLF3	5702	1518	625	6.03071	2.70929	13.3111	5.48053	2.22594	1.15441
XR_078725.1	LOC643438	397	153	63	8.73022	3.92241	19.2695	7.93451	2.22573	1.15428
XM_002344105.1	LOC100288525	616	126	52	4.63355	2.08653	10.2273	4.22078	2.22069	1.15101
XM_002347680.1	LOC100291210	616	126	52	4.63355	2.08653	10.2273	4.22078	2.22069	1.15101
XM_002344925.1	LOC100293820	616	126	52	4.63355	2.08653	10.2273	4.22078	2.22069	1.15101
NM_004048.2	B2M	999	18091	36792	410.224	910.313	905.455	1841.44	0.45064	1.14995
NR_002923.2	BCORL2	3504	1945	3953	12.5742	27.8847	27.754	56.407	0.450935	1.14901
NM_032873.4	UBASH3B	7003	2787	1152	9.01523	4.06604	19.8986	8.22505	2.2172	1.14874
NM_001130675.1	CLGN	2863	837	346	6.62259	2.98716	14.6175	6.04261	2.21702	1.14862
NM_001037738.1	NPM1	1289	1842	762	32.3713	14.6118	71.4507	29.5578	2.21542	1.14758
NM_006871.3	RIPK3	1964	200	406	2.30681	5.10961	5.09165	10.336	0.451466	1.14731
NM_032900.4	ARHGAP19	5546	5902	2443	24.107	10.888	53.2095	22.0249	2.2141	1.14672
NM_001080393.1	GLT8D4	1566	1717	711	24.8372	11.2223	54.8212	22.7011	2.21321	1.14614
NM_018009.4	TAPBPL	1856	356	722	4.34506	9.61529	9.59052	19.4504	0.451891	1.14595
NM_024922.4	CES3	3937	778	1577	4.4765	9.90078	9.88062	20.0279	0.452136	1.14517
NM_176895.1	PPAP2A	1661	555	230	7.56915	3.42264	16.7068	6.92354	2.2115	1.14502
NM_001083116.1	PRF1	2586	299	606	2.61919	5.79225	5.78113	11.7169	0.452189	1.145
XM_002343715.1	LOC100287640	413	124	251	6.80136	15.022	15.0121	30.3874	0.452761	1.14318
XM_002348035.1	LOC100291213	413	124	251	6.80136	15.022	15.0121	30.3874	0.452761	1.14318
XM_002345434.1	LOC100291946	413	124	251	6.80136	15.022	15.0121	30.3874	0.452761	1.14318
XM_002347738.1	LOC100131192	1476	212	429	3.25367	7.18413	7.18157	14.5325	0.452897	1.14274
NM_053275.3	RPLP0	1305	11748	4877	203.928	92.373	450.115	186.858	2.20766	1.14252
NM_175841.1	SMOX	1121	431	179	8.70955	3.94685	19.2239	7.98394	2.20671	1.1419
NM_001288.4	CLIC1	1280	3914	7912	69.2684	152.785	152.891	309.062	0.453373	1.14123
NM_001821.3	CHML	7170	1908	793	6.02814	2.73374	13.3054	5.52999	2.20509	1.14084
NM_005335.4	HCLS1	2075	2126	4293	23.2097	51.1382	51.2289	103.446	0.453862	1.13968
NM_030792.6	GDPD5	3232	675	1363	4.73104	10.4238	10.4425	21.086	0.453867	1.13966
NM_007210.3	GALNT6	4576	658	1328	3.25735	7.17324	7.18969	14.5105	0.454097	1.13893
NM_031937.1	TBC1D10A	1997	1444	2914	16.38	36.0674	36.1542	72.9594	0.454149	1.13876
NM_017815.1	HAUS4	1638	2253	938	31.1581	14.1544	68.7729	28.6325	2.2013	1.13836
NM_001017530.1	PRR5	1923	432	180	5.08895	2.31364	11.2324	4.68019	2.19954	1.1372
NM_001584.2	MPPED2	2434	1027	428	9.55815	4.34637	21.097	8.79211	2.19911	1.13692
NM_022107.1	GPSM3	1490	2127	4283	32.3374	71.0501	71.3758	143.725	0.455135	1.13563
NM_003680.3	YARS	3155	12116	5059	86.9929	39.634	192.013	80.1743	2.1949	1.13416
NM_012484.2	HMMR	3180	2920	1220	20.8008	9.48278	45.9119	19.1824	2.19353	1.13326
NM_201629.1	TJP2	4229	1089	455	5.8333	2.65936	12.8754	5.37952	2.1935	1.13323
NM_015656.1	KIF26A	6841	1416	592	4.68886	2.13897	10.3494	4.32685	2.19211	1.13232
NR_027241.1	LOC388796	1200	1568	656	29.5998	13.5122	65.3333	27.3333	2.1906	1.13133
NR_001577.1	NME2P1	701	1431	599	46.243	21.1209	102.068	42.7247	2.18944	1.13056
NM_015646.4	RAP1B	2152	753	1509	7.92641	17.3321	17.4954	35.0604	0.457327	1.1287
NM_004031.2	IRF7	2076	252	505	2.74978	6.01267	6.06936	12.1628	0.457331	1.12869
NM_003307.3	TRPM2	5949	1323	2651	5.03779	11.0146	11.1195	22.2811	0.457374	1.12855
NM_007074.2	CORO1A	1640	31289	62655	432.187	944.311	953.933	1910.21	0.457675	1.12761
NM_013299.3	SAC3D1	1603	1199	503	16.9438	7.75599	37.3986	15.6893	2.1846	1.12737
NM_001018837.1	HAX1	1065	2559	1074	54.4308	24.9263	120.141	50.4225	2.18367	1.12675
NM_017573.3	PCSK4	2707	540	1080	4.51887	9.8614	9.97414	19.9483	0.458238	1.12583
NM_080654.2	CCDC34	2146	657	276	6.93521	3.17894	15.3075	6.43057	2.18161	1.12539
NM_030641.3	APOL6	10282	3263	6523	7.18892	15.681	15.8675	31.7205	0.458449	1.12517
NM_005384.2	NFIL3	2130	921	387	9.79499	4.49091	21.6197	9.08451	2.18107	1.12504
NM_014046.3	MRPS18B	1555	1944	817	28.3198	12.9866	62.508	26.2701	2.1807	1.12479
NM_001145278.1	NECAP2	2039	1859	3712	20.6531	44.9981	45.5861	91.025	0.458979	1.1235
NM_006260.3	DNAJC3	5667	4255	1790	17.0087	7.80734	37.5419	15.7932	2.17855	1.12337
NM_006152.2	LRMP	2861	2441	1027	19.3274	8.8727	42.6599	17.9483	2.1783	1.1232
NM_021116.2	ADCY1	12655	2669	1123	4.77761	2.19341	10.5452	4.43698	2.17816	1.12311
NM_001959.3	EEF1B2	1142	598	252	11.862	5.45428	26.1821	11.0333	2.17481	1.12089
NM_018214.4	LRRC1	3219	1213	512	8.53619	3.93144	18.8413	7.95278	2.17126	1.11853
NM_012460.2	TIMM9	1121	926	391	18.7124	8.62133	41.3024	17.4398	2.17048	1.11801
NM_003153.3	STAT6	4042	3673	7305	20.5849	44.6711	45.4354	90.3637	0.46081	1.11776
NM_001142287.1	SEMA4D	4472	2764	5494	14.001	30.3662	30.9034	61.4267	0.461074	1.11693
NM_001127695.1	CTSA	2328	648	1288	6.30545	13.6753	13.9175	27.6632	0.461084	1.1169
NR_024464.1	LOC100188949	1608	584	247	8.22718	3.79677	18.1592	7.68035	2.16689	1.11563
XM_002348240.1	LOC100290187	1111	140	278	2.85455	6.18492	6.30063	12.5113	0.461535	1.11549
NM_004930.3	CAPZB	1749	6660	13224	86.2598	186.886	190.395	378.045	0.461565	1.1154
NM_001135055.1	TKT	2931	16803	7109	129.866	59.9509	286.643	121.273	2.1662	1.11517
NM_032564.3	DGAT2	2516	264	524	2.37694	5.14782	5.24642	10.4134	0.461736	1.11486
NM_138342.3	GLB1L2	3217	789	334	5.55584	2.56625	12.263	5.19117	2.16497	1.11435
NM_033631.3	LUZP1	8593	2115	4196	5.57557	12.0696	12.3065	24.4152	0.461951	1.11419
NR_002578.2	GAS5	659	5316	2251	182.736	84.4293	403.338	170.789	2.16436	1.11394
XM_002345310.1	LOC100292079	5055	2670	5296	11.965	25.8958	26.4095	52.3838	0.462045	1.11389
NM_000985.3	RPL17	953	647	274	15.3793	7.10658	33.9454	14.3757	2.16409	1.11376
XM_002348258.1	LOC100294347	5055	2671	5295	11.9695	25.8909	26.4194	52.3739	0.462305	1.11308
NM_032014.2	MRPS24	723	2419	1025	75.7917	35.042	167.289	70.8852	2.16288	1.11296
XM_002345567.1	LOC100293014	1891	1906	3776	22.8326	49.3564	50.3966	99.8414	0.462607	1.11214
NM_004134.5	HSPA9	2885	12047	5111	94.5926	43.7888	208.787	88.5789	2.1602	1.11117
NM_002017.3	FLI1	4042	3249	6432	18.2086	39.3326	40.1905	79.5646	0.46294	1.1111
NM_001135242.1	NDRG1	3563	1524	3017	9.68932	20.9297	21.3865	42.3379	0.462946	1.11108
NM_001012515.2	FECH	7386	2597	1102	7.96502	3.68787	17.5806	7.46006	2.15979	1.11089
XM_002344132.1	LOC100288122	558	179	76	7.26679	3.36653	16.0394	6.81004	2.15854	1.11006
XM_002345098.1	LOC100293599	558	179	76	7.26679	3.36653	16.0394	6.81004	2.15854	1.11006
NM_018140.3	CEP72	2457	1257	534	11.5892	5.37204	25.58	10.8669	2.15732	1.10924
NM_012328.1	DNAJB9	2400	1005	427	9.48591	4.39764	20.9375	8.89583	2.15705	1.10906
NM_004346.3	CASP3	2722	1333	2635	11.0934	23.9274	24.4857	48.4019	0.463629	1.10896
NM_018304.2	PRR11	1333	3031	1288	51.5086	23.883	113.691	48.3121	2.15671	1.10883
NM_005999.2	TSNAX	2700	1552	3067	13.0212	28.0772	28.7407	56.7963	0.463766	1.10853
NM_001615.3	ACTG2	1361	1242	528	20.6722	9.58912	45.6282	19.3975	2.1558	1.10822
NM_006763.2	BTG2	2751	442	872	3.63962	7.83482	8.03344	15.8488	0.464544	1.10611
NM_002087.2	GRN	2352	2203	4345	21.2178	45.6621	46.8325	92.3682	0.464671	1.10572
NM_001135217.1	LRRC23	1844	371	158	4.55761	2.11787	10.0597	4.28416	2.15198	1.10566
NR_003051.2	RMRP	268	66	130	5.5787	11.9898	12.3134	24.2537	0.465288	1.1038
NM_032801.3	JAM3	3720	2846	1214	17.3307	8.06638	38.2527	16.3172	2.14851	1.10334
NM_001024382.1	HMBS	1445	1633	697	25.6001	11.9225	56.5052	24.1176	2.14721	1.10246
NM_001007253.2	ERV3	2864	438	860	3.46438	7.42213	7.64665	15.014	0.466763	1.09924
NM_020117.9	LARS	4928	11989	5129	55.1107	25.7256	121.642	52.0394	2.14226	1.09913
NM_003105.4	SORL1	11060	2494	4894	5.10817	10.9373	11.2749	22.1248	0.467039	1.09838
NM_006401.2	ANP32B	1637	11507	4926	159.235	74.3787	351.466	150.458	2.14086	1.09819
NM_005135.2	SLC12A6	7418	1445	2834	4.41271	9.44313	9.73982	19.1022	0.467293	1.0976
NM_012287.4	ACAP2	7289	3526	6913	10.9582	23.4424	24.1871	47.4208	0.467452	1.09711
XM_936251.3	LOC653888	1436	3501	6863	55.2283	118.131	121.901	238.962	0.467519	1.0969
NM_002649.2	PIK3CG	5446	1857	3639	7.72429	16.5161	17.0492	33.4098	0.467682	1.0964
NM_201428.1	RTN3	5003	5497	2357	24.8897	11.6448	54.937	23.5559	2.13741	1.09586
XM_002345131.1	LOC100292824	1063	1033	443	22.0136	10.3009	48.5889	20.8373	2.13706	1.09563
NM_003609.2	HIRIP3	2381	2014	864	19.1613	8.96928	42.2932	18.1436	2.13632	1.09513
NM_022835.2	PLEKHG2	7737	3215	6294	9.41309	20.1075	20.7768	40.6747	0.468139	1.09499
NM_012458.2	TIMM13	2001	2679	1150	30.3284	14.2054	66.9415	28.7356	2.13499	1.09423
XM_001723485.1	LOC100131209	586	198	85	7.65406	3.58529	16.8942	7.25256	2.13485	1.09413
NM_005540.2	INPP5B	4524	1256	2456	6.28914	13.4186	13.8815	27.1441	0.468686	1.09331
NM_032789.3	PARP10	3569	1209	2363	7.67368	16.3652	16.9375	33.1045	0.468904	1.09264
NM_004375.3	COX11	2457	1581	680	14.5764	6.8408	32.1734	13.838	2.13081	1.0914
NM_001010853.1	PM20D2	4766	1932	831	9.18284	4.30973	20.2686	8.718	2.13072	1.09134
NM_002271.4	IPO5	6094	9694	4170	36.035	16.9136	79.5372	34.214	2.13053	1.09121
XM_002343731.1	LOC100288900	2067	437	188	4.78922	2.24812	10.5709	4.54765	2.13032	1.09107
XM_002348022.1	LOC100290517	2067	437	188	4.78922	2.24812	10.5709	4.54765	2.13032	1.09107
XM_002345421.1	LOC100292282	2067	437	188	4.78922	2.24812	10.5709	4.54765	2.13032	1.09107
NM_203305.2	FAM102A	3688	1468	2866	9.01694	19.2083	19.9024	38.8557	0.46943	1.09102
NM_001159491.1	BRI3	707	216	93	6.92083	3.25137	15.2758	6.57709	2.12859	1.0899
NM_003823.2	TNFRSF6B	1138	142	277	2.82664	6.01645	6.23902	12.1705	0.469818	1.08983
XR_078343.1	LOC100287430	801	2634	1135	74.4916	35.024	164.419	70.8489	2.12687	1.08873
XR_079195.1	LOC100290580	801	2634	1135	74.4916	35.024	164.419	70.8489	2.12687	1.08873
XR_079007.1	LOC100291882	801	2634	1135	74.4916	35.024	164.419	70.8489	2.12687	1.08873
NM_207040.1	TCF12	4044	10938	4716	61.2704	28.8248	135.237	58.3086	2.12562	1.08788
NM_016183.3	MRTO4	2301	1122	484	11.0459	5.19914	24.3807	10.5172	2.12456	1.08716
NM_198580.1	SLC27A1	3606	441	858	2.77036	5.88118	6.11481	11.8968	0.471056	1.08603
NM_001029880.1	SFMBT2	4417	1083	2106	5.55425	11.7851	12.2595	23.8397	0.471293	1.0853
XM_002343703.1	LOC100286934	1740	1578	3066	20.5438	43.5538	45.3448	88.1034	0.471689	1.08409
XM_002348023.1	LOC100290571	1740	1578	3066	20.5438	43.5538	45.3448	88.1034	0.471689	1.08409
XM_002345422.1	LOC100292337	1740	1578	3066	20.5438	43.5538	45.3448	88.1034	0.471689	1.08409
NM_005720.2	ARPC1B	1538	3927	7629	57.84	122.607	127.666	248.017	0.471753	1.0839
NM_016573.2	GMIP	3576	1835	3564	11.6242	24.6345	25.6572	49.8322	0.471867	1.08355
NM_007047.3	BTN3A2	3859	1277	2477	7.49618	15.8655	16.5457	32.0938	0.472483	1.08167
NM_032343.1	CHCHD6	996	1355	587	30.818	14.5674	68.0221	29.4679	2.11554	1.08103
NM_005804.2	DDX39	1553	7272	3151	106.073	50.151	234.127	101.449	2.11508	1.08071
NM_153697.1	ANKRD44	3732	567	1099	3.44164	7.27879	7.59646	14.724	0.472831	1.0806
NM_001745.2	CAMLG	2230	2327	1009	23.6383	11.1838	52.1749	22.6233	2.11362	1.07971
NM_012455.2	PSD4	5101	5703	11047	25.3263	53.5294	55.9008	108.283	0.47313	1.07969
NM_018078.2	LARP1B	4028	860	373	4.83652	2.28888	10.6753	4.63009	2.11305	1.07933
NM_018964.3	SLC37A1	3136	943	1826	6.81177	14.3922	15.0351	29.1135	0.473295	1.07919
XM_002343139.1	LOC100288190	443	94	182	4.80671	10.1548	10.6095	20.5418	0.473345	1.07904
XM_002344631.1	LOC100292295	443	94	182	4.80671	10.1548	10.6095	20.5418	0.473345	1.07904
NM_033667.2	ITGB1	3821	3515	6802	20.8388	44.001	45.9958	89.0081	0.473598	1.07827
NR_024494.1	LOC644165	1445	169	327	2.64937	5.59349	5.84775	11.3149	0.473653	1.0781
NM_001018137.1	NME2	820	3226	1401	89.1199	42.2306	196.707	85.4268	2.11031	1.07746
NM_001015000.1	GIYD1	779	377	729	10.963	23.1309	24.1977	46.7908	0.473953	1.07719
NM_013262.3	MYLIP	3124	346	669	2.50893	5.2932	5.53777	10.7074	0.473992	1.07707
NM_019102.2	HOXA5	1348	306	133	5.14228	2.43874	11.3501	4.93323	2.10858	1.07627
NM_016113.3	TRPV2	2831	720	1391	5.76125	12.1448	12.7164	24.5673	0.47438	1.07588
NM_080616.3	C20orf112	6080	1651	3189	6.15131	12.9644	13.5773	26.2253	0.474475	1.0756
NR_028057.1	PLCXD1	2129	738	321	7.85244	3.72677	17.3321	7.53875	2.10704	1.07522
NM_198264.1	FAM189B	2957	1554	676	11.9048	5.65065	26.2766	11.4305	2.10681	1.07506
NM_014901.4	RNF44	4204	5812	11213	31.3175	65.9268	69.1246	133.361	0.475034	1.0739
NM_025108.2	C16orf59	1670	627	273	8.50502	4.04063	18.7725	8.17365	2.10487	1.07373
NM_006666.1	RUVBL2	1506	9508	4140	143.017	67.9483	315.671	137.45	2.1048	1.07368
NM_178044.1	GIYD2	797	378	729	10.7438	22.6085	23.7139	45.734	0.47521	1.07336
XM_002346233.1	LOC100293468	355	42	81	2.68006	5.63975	5.91549	11.4085	0.47521	1.07336
NM_001143905.1	C12orf65	1594	1040	453	14.7798	7.02446	32.6223	14.2095	2.10405	1.07317
NM_175736.4	FMNL3	11331	2811	5419	5.61975	11.821	12.404	23.9123	0.475404	1.07277
NR_004845.1	LOC644936	1474	357	688	5.48649	11.537	12.1099	23.3379	0.475555	1.07232
NM_173680.3	ZNF775	2303	752	328	7.39687	3.52033	16.3265	7.12115	2.10119	1.07121
NR_003141.2	SNHG4	741	204	89	6.23643	2.96876	13.7652	6.0054	2.10069	1.07086
NM_033280.2	SEC11C	802	1596	697	45.0799	21.4813	99.5012	43.4539	2.09856	1.0694
NM_024105.3	ALG12	2416	2095	915	19.6432	9.36111	43.3568	18.9363	2.09838	1.06928
NM_052924.2	RHPN1	3842	1790	3441	10.5541	22.1376	23.2952	44.7814	0.476749	1.0687
NM_198229.2	RGS12	5554	1030	1980	4.20103	8.81175	9.2726	17.825	0.476753	1.06869
NM_022909.3	CENPH	1422	897	392	14.2895	6.8138	31.5401	13.7834	2.09714	1.06842
NR_002819.2	MALAT1	8816	67266	129175	172.842	362.168	381.5	732.617	0.477241	1.06721
NM_138924.1	GAMT	971	1248	546	29.1152	13.8988	64.2636	28.1153	2.0948	1.06681
NM_004295.3	TRAF4	2938	1922	3687	14.8192	31.0188	32.7093	62.7468	0.477751	1.06567
XM_002345353.1	LOC100293608	580	153	67	5.97568	2.85529	13.1897	5.77586	2.09285	1.06547
NM_001675.2	ATF4	2047	5832	2556	64.5392	30.8636	142.452	62.4328	2.09111	1.06427
NM_001040437.1	C6orf48	852	6151	2696	163.542	78.2138	360.974	158.216	2.09097	1.06417
NM_001013717.1	C5orf56	2050	426	816	4.70739	9.83874	10.3902	19.9024	0.478454	1.06355
NM_025058.3	TRIM46	3181	402	770	2.86277	5.98315	6.31877	12.1031	0.478472	1.06349
NM_001352.3	DBP	1678	513	225	6.92547	3.31431	15.2861	6.70441	2.08956	1.0632
NM_015037.2	KIAA0913	5924	1683	3223	6.43566	13.4477	14.2049	27.2029	0.478569	1.0632
NM_018413.4	CHST11	1703	5022	9612	66.8015	139.509	147.446	282.208	0.478833	1.06241
XM_002342947.1	LOC100287994	833	1663	730	45.2242	21.6611	99.8199	43.8175	2.08781	1.06199
NM_001142547.1	RPUSD3	1213	920	404	17.1811	8.23235	37.9225	16.6529	2.08702	1.06145
NM_003470.2	USP7	5479	12746	5606	52.6983	25.2903	116.317	51.159	2.08373	1.05917
NM_002065.5	GLUL	4796	7431	3269	35.0988	16.8476	77.4708	34.0805	2.08331	1.05888
NR_002448.1	SNORD36A	72	25	11	7.86559	3.77627	17.3611	7.63889	2.0829	1.05859
NM_001161581.1	WDR51A	2312	1443	635	14.1385	6.78874	31.2067	13.7327	2.08264	1.05841
NR_027176.1	NCRNA00188	1205	4497	1980	84.5395	40.6145	186.598	82.1577	2.08151	1.05763
XM_002343709.1	LOC100287206	1408	184	351	2.96032	6.1618	6.53409	12.4645	0.480432	1.0576
XM_002346181.1	LOC100292591	839	1660	731	44.8198	21.5357	98.9273	43.5638	2.08119	1.05741
XM_002342371.1	LOC100289083	1589	2893	1274	41.2428	19.8175	91.0321	40.0881	2.08113	1.05737
XM_002346577.1	LOC100291140	1589	2893	1274	41.2428	19.8175	91.0321	40.0881	2.08113	1.05737
XM_002345705.1	LOC100293321	1589	2893	1274	41.2428	19.8175	91.0321	40.0881	2.08113	1.05737
NM_152742.1	GPC2	2699	585	1115	4.90995	10.2112	10.8373	20.6558	0.480842	1.05637
NM_003141.3	TRIM21	1970	556	1059	6.39341	13.2872	14.1117	26.8782	0.481171	1.05538
NM_002901.2	RCN1	2560	517	228	4.57483	2.20139	10.0977	4.45312	2.07815	1.0553
NM_032871.3	RELT	3563	744	1417	4.73022	9.83008	10.4406	19.8849	0.481198	1.0553
XM_002345428.1	LOC100292595	1408	186	354	2.9925	6.21446	6.60511	12.571	0.481538	1.05428
NM_199332.2	HOMER2	1862	530	234	6.44793	3.10627	14.232	6.28357	2.07578	1.05365
NM_000143.2	FH	1813	5055	2232	63.1608	30.4298	139.41	61.5554	2.07562	1.05354
NM_019112.3	ABCA7	6919	1389	2642	4.54761	9.43827	10.0376	19.0924	0.481826	1.05342
NM_001145417.1	MSL2	3943	5684	2511	32.6551	15.7407	72.0771	31.8412	2.07457	1.05281
NM_018639.3	WSB2	2868	1856	3525	14.6596	30.3797	32.357	61.454	0.482547	1.05126
NR_002572.1	SNORD58B	66	52	23	17.8477	8.61364	39.3939	17.4242	2.07203	1.05105
NM_004690.2	LATS1	4815	1591	3021	7.48511	15.5081	16.5213	31.3707	0.482659	1.05092
NM_031412.2	GABARAPL1	1908	514	975	6.10251	12.6308	13.4696	25.5503	0.483147	1.04947
NM_004973.2	JARID2	5827	4832	9157	18.7848	38.8429	41.4622	78.5739	0.483609	1.04809
NM_014045.3	LRP10	3292	1986	3763	13.6661	28.2538	30.164	57.1537	0.483689	1.04785
NM_021831.5	AGBL5	3294	2842	1261	19.5445	9.46225	43.139	19.1409	2.06552	1.04651
NM_175058.4	PLEKHA7	4880	1293	574	6.00209	2.90734	13.248	5.88115	2.06447	1.04577
NM_182811.1	PLCG1	5267	9275	17544	39.891	82.3319	88.0482	166.546	0.484514	1.04539
NM_000208.2	INSR	9172	2675	1188	6.60669	3.20151	14.5824	6.47623	2.06361	1.04517
NM_003945.3	ATP6V0E1	905	1357	2566	33.9669	70.0827	74.9724	141.768	0.484668	1.04493
NM_007083.3	NUDT6	1209	297	132	5.56486	2.69868	12.2829	5.45906	2.06207	1.04409
XM_002347349.1	LOC100291358	984	108	204	2.4863	5.12434	5.4878	10.3659	0.485193	1.04337
XM_002344701.1	LOC100293922	984	108	204	2.4863	5.12434	5.4878	10.3659	0.485193	1.04337
XM_002348031.1	LOC100290895	1408	188	355	3.02468	6.23202	6.67614	12.6065	0.485345	1.04292
NM_153353.3	LRRC34	1466	299	133	4.62021	2.24244	10.1978	4.53615	2.06035	1.04289
NM_024535.3	CORO7	3575	2311	4363	14.6436	30.1656	32.3217	61.021	0.48544	1.04263
NM_182491.2	ZFAND2A	918	928	413	22.8997	11.1201	50.5447	22.4946	2.0593	1.04215
NM_202758.2	ENOSF1	1846	2332	1038	28.6168	13.8985	63.1636	28.1148	2.05898	1.04193
NM_001129897.1	NUSAP1	2348	5149	2292	49.6763	24.1279	109.647	48.8075	2.05887	1.04185
NM_016513.4	ICK	6315	778	1468	2.79081	5.74587	6.15994	11.6231	0.485707	1.04184
NM_032037.2	TSSK6	1460	465	207	7.2148	3.50446	15.9247	7.08904	2.05875	1.04177
NM_001175.4	ARHGDIB	1231	30803	58072	566.838	1166.04	1251.14	2358.73	0.486124	1.0406
NM_021144.3	PSIP1	1711	1627	725	21.5408	10.4735	47.5453	21.1864	2.0567	1.04033
NM_006233.4	POLR2I	896	1838	820	46.4688	22.6208	102.567	45.7589	2.05425	1.03861
NM_080621.4	SAMD10	2223	417	785	4.24933	8.72837	9.37922	17.6563	0.486841	1.03848
NM_012233.1	RAB3GAP1	4231	4161	1859	22.2781	10.8602	49.1728	21.9688	2.05135	1.03657
NR_002952.1	SNORA9	134	25	47	4.22629	8.66954	9.32836	17.5373	0.487487	1.03656
NM_014831.2	TRANK1	10630	1496	2812	3.18803	6.5386	7.03669	13.2267	0.48757	1.03632
NM_002355.2	M6PR	2484	2671	5017	24.3583	49.9224	53.7641	100.986	0.487922	1.03528
NM_199002.1	ARHGEF1	3301	4996	9374	34.2847	70.1912	75.674	141.987	0.488448	1.03372
NM_001127325.1	MAD2L2	1210	5097	2282	95.4231	46.6158	210.62	94.2975	2.04701	1.03352
NM_014427.4	CPNE7	2707	891	399	7.45613	3.64324	16.4573	7.36978	2.04657	1.03321
NM_001105530.1	CAP1	2814	3079	5773	24.7862	50.7085	54.7086	102.576	0.488798	1.03269
NM_017887.1	C1orf123	1131	1415	634	28.3412	13.8557	62.5553	28.0283	2.04545	1.03242
NM_020158.3	EXOSC5	1018	1320	592	29.3731	14.374	64.833	29.0766	2.04349	1.03104
NM_001144869.1	LIPT2	971	263	118	6.13565	3.00376	13.5427	6.07621	2.04265	1.03044
NM_001916.3	CYC1	1250	4348	1951	78.7959	38.5789	173.92	78.04	2.04246	1.03031
NM_001470.2	GABBR1	4603	653	1222	3.21363	6.56196	7.0932	13.274	0.489737	1.02992
NM_016049.3	FAM158A	907	764	343	19.0814	9.34738	42.1169	18.9085	2.04136	1.02953
NM_022110.3	FKBPL	1373	363	163	5.98908	2.93441	13.2192	5.93591	2.04099	1.02927
NM_022047.3	DEF6	2348	4768	8914	46.0005	93.8377	101.533	189.821	0.490213	1.02852
NM_052963.1	TOP1MT	1947	1658	745	19.2905	9.45787	42.5783	19.132	2.03962	1.0283
XR_039613.2	LOC100127952	1422	741	333	11.8044	5.78825	26.0549	11.7089	2.03937	1.02812
NM_024119.2	DHX58	2663	379	708	3.22398	6.57151	7.11603	13.2933	0.490599	1.02738
NM_001110215.1	CENPM	564	558	251	22.4119	11.0001	49.4681	22.2518	2.03742	1.02675
XR_017650.3	LOC646791	747	1042	469	31.5988	15.5187	69.7456	31.3922	2.03618	1.02586
NM_018166.1	FAM176B	1067	141	263	2.9935	6.09248	6.60731	12.3243	0.491343	1.0252
NM_002198.2	IRF1	3611	1817	3389	11.3986	23.1978	25.1592	46.9261	0.491365	1.02513
NM_147162.1	IL11RA	1476	326	608	5.00329	10.1817	11.0434	20.5962	0.4914	1.02503
XM_002343096.1	LOC100288054	732	1179	531	36.486	17.9303	80.5328	36.2705	2.03489	1.02495
XM_002344587.1	LOC100292348	732	1179	531	36.486	17.9303	80.5328	36.2705	2.03489	1.02495
NM_030624.2	KLHL15	6368	2517	1134	8.95373	4.40162	19.7629	8.90389	2.03419	1.02445
NM_002056.2	GFPT1	8750	5885	2652	15.2357	7.49149	33.6286	15.1543	2.03373	1.02413
NM_144601.2	CMTM3	2167	3015	5619	31.5175	64.0919	69.5662	129.649	0.491756	1.02399
NM_020378.2	NAT14	1347	876	395	14.732	7.24824	32.5167	14.6622	2.03249	1.02325
NM_004877.2	GMFG	682	2752	5126	91.4088	185.779	201.76	375.806	0.492029	1.02318
NM_173075.4	APBB2	9046	1918	865	4.80304	2.36354	10.6014	4.78112	2.03214	1.023
NM_000177.4	GSN	2752	516	961	4.24742	8.63134	9.375	17.46	0.492093	1.023
XM_002346893.1	LOC100290647	820	1024	462	28.2885	13.9262	62.439	28.1707	2.03132	1.02242
XM_002346011.1	LOC100293511	820	1024	462	28.2885	13.9262	62.439	28.1707	2.03132	1.02242
NM_031966.2	CCNB1	2127	6688	3018	71.2283	35.0715	157.217	70.945	2.03094	1.02215
NM_031942.4	CDCA7	2874	6207	2802	48.9237	24.0982	107.985	48.7474	2.03018	1.02161
NM_001004356.2	FGFRL1	3255	1300	2418	9.04725	18.3615	19.9693	37.1429	0.492729	1.02113
XM_002343293.1	LOC100288262	429	93	42	4.91077	2.41989	10.8392	4.8951	2.02934	1.02101
XM_002344802.1	LOC100293387	429	93	42	4.91077	2.41989	10.8392	4.8951	2.02934	1.02101
NM_016306.4	DNAJB11	1744	4384	1980	56.944	28.0622	125.688	56.7661	2.02921	1.02092
NM_003289.3	TPM2	1343	415	771	6.99997	14.19	15.4505	28.7044	0.493304	1.01945
XM_002343119.1	LOC100289344	2607	1705	771	14.8152	7.30998	32.7004	14.7871	2.02671	1.01914
XM_002347270.1	LOC100290527	2607	1705	771	14.8152	7.30998	32.7004	14.7871	2.02671	1.01914
XM_002344365.1	LOC100288746	820	1019	461	28.1504	13.896	62.1341	28.1098	2.02579	1.01848
XM_002344623.1	LOC100292445	2607	1703	771	14.7978	7.30998	32.6621	14.7871	2.02433	1.01744
XM_002343461.1	LOC100288452	581	69	128	2.69028	5.44549	5.93804	11.0155	0.494038	1.01731
XM_002347641.1	LOC100291406	581	69	128	2.69028	5.44549	5.93804	11.0155	0.494038	1.01731
XM_002344884.1	LOC100292182	581	69	128	2.69028	5.44549	5.93804	11.0155	0.494038	1.01731
NM_003377.3	VEGFB	1186	1744	790	33.3109	16.4644	73.5245	33.3052	2.02321	1.01664
NM_001135175.1	NEDD1	3852	4055	1838	23.8467	11.794	52.635	23.8577	2.02193	1.01573
NM_014787.2	DNAJC6	5821	1255	569	4.88394	2.41612	10.7799	4.88748	2.0214	1.01536
NM_021999.4	ITM2B	1919	4726	8745	55.7883	112.639	123.137	227.853	0.495285	1.01367
XM_002346309.1	LOC100291994	1250	370	168	6.70526	3.32202	14.8	6.72	2.01843	1.01323
NM_178443.2	FERMT3	2602	2335	4318	20.3284	41.0184	44.8693	82.9746	0.495593	1.01277
NM_017741.3	DCAF16	4604	2404	1092	11.8283	5.8626	26.1077	11.8593	2.01759	1.01263
XM_002343729.1	LOC100288737	616	209	95	7.68581	3.81194	16.9643	7.71104	2.01625	1.01167
XM_002348052.1	LOC100289932	616	209	95	7.68581	3.81194	16.9643	7.71104	2.01625	1.01167
XM_002345409.1	LOC100293462	616	209	95	7.68581	3.81194	16.9643	7.71104	2.01625	1.01167
NM_001080954.1	PLAGL1	3420	684	311	4.53058	2.24769	10	4.54678	2.01566	1.01125
NM_006688.3	C1QL1	1535	732	333	10.8026	5.36215	23.8436	10.8469	2.0146	1.01049
NM_000252.2	MTM1	3495	715	1320	4.63429	9.33533	10.2289	18.8841	0.496424	1.01035
XM_002345432.1	LOC100291837	252	13622	6200	1224.52	608.127	2702.78	1230.16	2.01359	1.00977
XM_001721365.2	LOC100129585	948	369	168	8.81743	4.3803	19.462	8.86076	2.01297	1.00933
NM_001164783.1	BCKDHA	1810	2530	1152	31.664	15.7317	69.8895	31.8232	2.01275	1.00917
NM_001009.3	RPS5	764	11567	5269	342.966	170.466	757.003	344.83	2.01193	1.00858
NM_015461.2	ZNF521	5047	967	1783	4.34027	8.73215	9.57995	17.664	0.497046	1.00855
NM_001039140.1	C20orf27	1393	1734	790	28.1982	14.0178	62.2398	28.3561	2.01161	1.00835
NM_024618.2	NLRX1	3808	1176	2167	6.99575	14.0658	15.4412	28.4533	0.497358	1.00764
NM_006844.3	ILVBL	2357	1562	712	15.0122	7.46661	33.1353	15.1039	2.01058	1.00761
NM_016034.3	MRPS2	1528	1984	905	29.4132	14.6396	64.9215	29.6139	2.00916	1.00659
NM_001127213.1	LY6E	1203	2385	1088	44.9104	22.3546	99.1272	45.2203	2.009	1.00648
NM_212481.1	ARID5A	2250	752	1384	7.57111	15.204	16.7111	30.7556	0.49797	1.00587
NM_181720.2	ARHGAP30	3936	5511	10142	31.7175	63.69	70.0076	128.836	0.497998	1.00579
NM_017872.3	THG1L	1336	528	241	8.95265	4.45875	19.7605	9.01946	2.00788	1.00567
NM_201403.2	MOBKL2C	2857	312	574	2.47382	4.96598	5.46027	10.0455	0.498154	1.00534
NM_206921.2	C6orf204	2416	449	826	4.20992	8.45057	9.29222	17.0944	0.498181	1.00526
NM_015196.3	KIAA0922	5092	7676	3505	34.1484	17.0139	75.3731	34.4167	2.0071	1.00511
NM_003358.1	UGCG	1657	330	607	4.51144	9.0546	9.95775	18.3162	0.498249	1.00506
NM_005245.3	FAT1	14957	26290	12005	39.8171	19.839	87.8853	40.1317	2.00701	1.00505
NM_178313.2	SPTBN1	9204	30411	55923	74.8476	150.182	165.205	303.797	0.498381	1.00468
NM_001144012.1	TMX2	1591	1596	729	22.7241	11.3256	50.1571	22.9101	2.00644	1.00464
NM_001137550.1	LRRFIP1	4160	625	1149	3.40338	6.827	7.51202	13.8101	0.498518	1.00428
NM_001099220.1	ZNF862	6999	1862	3423	6.02654	12.0885	13.3019	24.4535	0.498533	1.00424
NM_178858.4	SFXN2	2594	569	260	4.96897	2.47746	10.9676	5.01157	2.00567	1.00409
NM_001136180.1	HSBP1L1	775	374	171	10.9319	5.45378	24.129	11.0323	2.00446	1.00321
NM_001031713.2	CCDC90A	1263	1614	738	28.9484	14.443	63.8955	29.2162	2.00433	1.00312
NM_024026.4	MRP63	2704	2251	1030	18.8579	9.41529	41.6235	19.0459	2.0029	1.00209
NM_024808.2	C13orf34	2838	1827	836	14.5831	7.2811	32.1882	14.7287	2.00287	1.00207
NM_001135773.1	SPATA2	4207	734	1347	3.95228	7.91404	8.72356	16.009	0.499401	1.00173
NM_000100.2	CSTB	682	1417	2600	47.0662	94.2306	103.886	190.616	0.499479	1.0015
NM_021724.2	NR1D1	2800	1118	512	9.04498	4.51976	19.9643	9.14286	2.00121	1.00087
NM_013980.2	BNIP1	1302	528	242	9.18643	4.59417	20.2765	9.29339	1.99958	0.9997
NM_080660.3	ZC3HAV1L	1824	1106	507	13.7358	6.87047	30.318	13.898	1.99925	0.999462
NM_001039091.1	PRPS2	2549	2447	1122	21.7464	10.8799	47.9992	22.0086	1.99877	0.99911
NM_201555.1	FHL2	1930	785	360	9.21375	4.6105	20.3368	9.32642	1.99843	0.998864
XM_002344186.1	LOC100287323	561	255	467	10.2968	20.5758	22.7273	41.6221	0.500431	0.998757
XM_002348074.1	LOC100291034	561	255	467	10.2968	20.5758	22.7273	41.6221	0.500431	0.998757
XM_002345459.1	LOC100292558	561	255	467	10.2968	20.5758	22.7273	41.6221	0.500431	0.998757
NM_016167.3	NOL7	907	2067	948	51.6247	25.8347	113.947	52.2602	1.99827	0.998748
NM_001031694.1	SCMH1	3347	2658	1220	17.9897	9.00963	39.7072	18.2253	1.99672	0.997629
NM_006943.2	SOX12	4703	3139	1441	15.1196	7.57342	33.3723	15.32	1.9964	0.997403
NM_006993.2	NPM3	915	1796	825	44.4641	22.2862	98.1421	45.082	1.99514	0.99649
NM_001007538.1	SHISA2	2925	1168	537	9.04568	4.53786	19.9658	9.17949	1.99338	0.995215
XM_002342530.1	LOC100287776	2352	964	1761	9.28461	18.5065	20.4932	37.4362	0.501694	0.995121
NM_023080.2	C8orf33	2649	1997	919	17.0773	8.57505	37.6935	17.3462	1.99151	0.993866
NM_016612.2	SLC25A37	1888	1219	561	14.626	7.34453	32.2828	14.857	1.99142	0.993794
XM_002343724.1	LOC100288393	883	378	174	9.6974	4.8707	21.4043	9.85277	1.99096	0.993468
XM_002345417.1	LOC100292107	883	378	174	9.6974	4.8707	21.4043	9.85277	1.99096	0.993468
NM_001020.4	RPS16	610	13493	6213	501.075	251.753	1105.98	509.262	1.99034	0.993018
NM_152834.2	TMEM18	2164	2418	1114	25.3118	12.7242	55.8688	25.7394	1.98926	0.992234
NM_001031812.2	CSNK1G3	4420	894	412	4.58183	2.30398	10.1131	4.66063	1.98866	0.991799
XM_002345303.1	LOC729806	1902	1222	2227	14.5541	28.9409	32.1241	58.5436	0.502889	0.991689
XM_002346681.1	LOC100289924	2352	967	1762	9.31351	18.517	20.557	37.4575	0.502969	0.991457
XM_002345810.1	LOC100292294	2352	967	1762	9.31351	18.517	20.557	37.4575	0.502969	0.991457
NM_001436.3	FBL	1185	7623	3514	145.724	73.297	321.646	148.27	1.98813	0.991413
NM_199368.1	TRPC4AP	3204	9914	4571	70.0939	35.2632	154.713	71.3327	1.98774	0.991126
NM_001211.5	BUB1B	3795	4769	2199	28.4669	14.3224	62.8327	28.9723	1.98757	0.991008
NR_003045.1	SNORD17	239	28	51	2.6539	5.27443	5.85774	10.6695	0.503163	0.990902
XM_001718888.2	LOC100130107	896	193	89	4.87948	2.45519	10.7701	4.96652	1.98741	0.990892
NM_015946.4	PELO	2977	1013	1845	7.70823	15.3187	17.0138	30.9876	0.503192	0.990818
NM_032448.1	FAM120B	3301	1184	2156	8.12513	16.1438	17.934	32.6568	0.503297	0.990519
NM_173622.3	CDRT4	2520	346	630	3.11028	6.17935	6.86508	12.5	0.503334	0.990411
NM_001029989.1	KIAA0101	1361	1318	608	21.9372	11.042	48.4203	22.3365	1.9867	0.990376
NR_003697.1	C7orf40	847	1366	2486	36.5335	72.5472	80.6375	146.753	0.503582	0.9897
NM_001077269.1	WIPF1	4722	2532	4608	12.1468	24.1207	26.8107	48.7929	0.503584	0.989695
NM_006441.2	MTHFS	912	310	564	7.7	15.2858	16.9956	30.9211	0.503737	0.989258
NM_001145009.1	BTN3A1	4243	1024	1862	5.46702	10.847	12.0669	21.942	0.504012	0.988469
NM_001159704.1	FHL1	2942	1335	617	10.2793	5.18377	22.6886	10.4861	1.98297	0.987666
NM_006670.3	TPBG	2408	336	610	3.16087	6.26147	6.97674	12.6661	0.504813	0.986179
NM_019839.3	LTB4R2	3137	735	1334	5.30758	10.511	11.715	21.2624	0.504955	0.985774
NM_001166131.1	EME1	2400	1188	550	11.2132	5.66441	24.75	11.4583	1.97959	0.9852
NM_033276.2	XRCC6BP1	1196	676	313	12.8038	6.46869	28.2609	13.0853	1.97935	0.985029
NM_018110.3	DOK4	2784	378	685	3.07572	6.08169	6.78879	12.3024	0.505734	0.983549
NM_006397.2	RNASEH2A	1162	2388	1107	46.5535	23.5475	102.754	47.6334	1.977	0.983316
XM_002343254.1	LOC100287697	1133	228	413	4.55857	9.00997	10.0618	18.2259	0.505948	0.982939
NM_134260.2	RORA	11135	2691	1248	5.47454	2.7703	12.0835	5.60395	1.97615	0.982693
NM_006530.2	YEATS4	1421	1194	554	19.0342	9.63649	42.0127	19.4933	1.97522	0.982014
NM_032323.2	TMEM79	2242	618	287	6.2442	3.16409	13.7823	6.40054	1.97346	0.980725
NM_005082.4	TRIM25	5815	6720	3121	26.1784	13.2662	57.7816	26.8358	1.97332	0.980622
NM_000538.3	RFXAP	2860	958	445	7.58793	3.84589	16.7483	7.77972	1.973	0.980389
NM_003851.2	CREG1	2073	1406	654	15.3642	7.79797	33.9122	15.7742	1.97028	0.978403
NM_013296.4	GPSM2	3076	1945	905	14.3238	7.27219	31.6157	14.7107	1.96966	0.977949
XM_002342176.1	LOC100288820	410	464	216	25.6365	13.0219	56.5854	26.3415	1.96873	0.977262
XM_002345301.1	LOC100291559	410	464	216	25.6365	13.0219	56.5854	26.3415	1.96873	0.977262
NM_006540.2	NCOA2	6233	1628	2936	5.91672	11.6429	13.0595	23.5521	0.508182	0.976583
NM_030767.4	AKNA	7479	7742	13958	23.4495	46.1299	51.7583	93.3146	0.508336	0.976145
XM_002344792.1	LOC100293777	1133	228	411	4.55857	8.96633	10.0618	18.1377	0.50841	0.975936
XM_002345188.1	LOC100293252	512	105	49	4.64562	2.36553	10.2539	4.78516	1.96388	0.973704
NM_004539.3	NARS	2903	7377	3444	57.5648	29.3237	127.058	59.3179	1.96308	0.973118
NM_001033859.1	ACADVL	2282	3880	6980	38.5159	75.6037	85.0131	152.936	0.509445	0.973002
NM_145697.2	NUF2	2013	2056	961	23.1368	11.8	51.0681	23.8698	1.96074	0.971401
XM_002347873.1	LOC100290103	656	464	217	16.0228	8.17634	35.3659	16.5396	1.95965	0.970599
XM_001726681.2	LOC100132364	721	464	217	14.5783	7.43922	32.1775	15.0485	1.95965	0.970599
NM_001029835.1	CCM2	2166	2862	5139	29.932	58.6439	66.0665	118.629	0.510402	0.970295
XM_002342477.1	LOC100288094	470	109	51	5.25355	2.6821	11.5957	5.42553	1.95874	0.969928
XM_002346621.1	LOC100290766	470	109	51	5.25355	2.6821	11.5957	5.42553	1.95874	0.969928
XM_002345759.1	LOC100292667	470	109	51	5.25355	2.6821	11.5957	5.42553	1.95874	0.969928
NM_000976.2	RPL12	639	327	153	11.5923	5.91825	25.5869	11.9718	1.95874	0.969928
NM_000532.3	PCCB	1851	4546	2129	55.6349	28.4297	122.798	57.5095	1.95693	0.96859
NM_020808.3	SIPA1L2	6582	3286	1539	11.3092	5.77941	24.962	11.691	1.95682	0.968508
NM_021111.2	RECK	4482	512	918	2.58775	5.0626	5.71174	10.241	0.51115	0.968182
NM_017877.3	C2orf18	3960	1379	2472	7.88848	15.4297	17.4116	31.2121	0.511254	0.967888
NM_015982.3	YBX2	1626	446	209	6.21353	3.17708	13.7146	6.42681	1.95573	0.96771
XM_002346509.1	LOC100290913	3130	2622	4699	18.9763	37.1077	41.885	75.0639	0.511385	0.967517
NM_001135775.1	C9orf7	2661	447	801	3.80528	7.4403	8.3991	15.0507	0.511442	0.967359
XM_002345732.1	LOC100291640	1809	990	1774	12.3971	24.2392	27.3632	49.0326	0.511449	0.967337
NM_001099433.1	JAKMIP1	3048	2572	1206	19.1153	9.77992	42.1916	19.7835	1.95454	0.966829
NM_003249.3	THOP1	2600	3874	1817	33.7528	17.2737	74.5	34.9423	1.95401	0.966434
NM_207197.1	ADAM15	3007	368	659	2.77229	5.41695	6.11906	10.9578	0.51178	0.966404
NM_001007074.1	RPL32	1809	3264	1531	40.8729	20.9189	90.2156	42.3162	1.95387	0.966336
NM_025146.1	NAT13	3620	5268	2473	32.9656	16.8857	72.7624	34.1575	1.95228	0.965162
NM_198196.2	CD96	4537	3203	5729	15.9923	31.2114	35.2987	63.1364	0.512388	0.964691
NM_018093.2	WDR74	1402	2031	954	32.816	16.8191	72.4322	34.0228	1.95111	0.964298
NM_005036.4	PPARA	10174	1765	3155	3.92986	7.66497	8.67407	15.5052	0.512704	0.963803
NM_014167.3	CCDC59	1631	634	298	8.80561	4.51612	19.4359	9.1355	1.94982	0.963339
NM_145306.2	C10orf35	1105	684	1222	14.0223	27.3346	30.9502	55.2941	0.512986	0.963007
NM_001039535.2	SKA1	2974	1597	751	12.1643	6.24169	26.8494	12.6261	1.94888	0.962648
NM_001191.2	BCL2L1	2415	2685	4794	25.1855	49.0664	55.5901	99.2547	0.513295	0.962139
NM_016069.8	Magmas	533	697	328	29.623	15.2107	65.3846	30.7692	1.94751	0.961632
NR_002560.1	SNORD31	68	17	8	5.66323	2.90793	12.5	5.88235	1.94751	0.961632
NM_032680.3	EFCAB4B	2335	1259	593	12.2141	6.27727	26.9593	12.6981	1.94577	0.960343
XM_002343571.1	LOC100288571	1230	1399	659	25.7654	13.2429	56.8699	26.7886	1.9456	0.960214
XM_002347793.1	LOC100290679	1230	1399	659	25.7654	13.2429	56.8699	26.7886	1.9456	0.960214
NM_144977.4	DENND1B	2409	507	904	4.76755	9.27544	10.523	18.763	0.513997	0.960168
NM_182540.4	DDX26B	3900	782	1394	4.5422	8.83489	10.0256	17.8718	0.514121	0.959821
NM_178547.2	ZBTB8OS	725	244	115	7.62388	3.92069	16.8276	7.93103	1.94452	0.959416
XR_015499.3	LOC728324	761	110	196	3.2744	6.36611	7.22733	12.8778	0.514349	0.959181
NM_001500.2	GMDS	1719	2225	1049	29.321	15.0835	64.7179	30.5119	1.94391	0.958959
NM_000110.3	DPYD	4506	1039	1851	5.22334	10.1536	11.5291	20.5393	0.514435	0.95894
XM_002347446.1	LOC100289837	1130	232	413	4.65086	9.03389	10.2655	18.2743	0.514824	0.957848
NM_018275.3	C7orf43	2595	635	1130	5.5432	10.7633	12.2351	21.7726	0.515011	0.957326
XM_002343033.1	LOC729081	765	136	242	4.02718	7.8191	8.88889	15.817	0.515044	0.957232
NM_007147.2	ZNF175	3835	939	1670	5.54657	10.7635	12.2425	21.7731	0.515312	0.956482
NM_002468.4	MYD88	2897	2776	4935	21.7068	42.1058	47.9116	85.1743	0.515529	0.955874
NM_001029882.2	AHDC1	6593	1195	2123	4.1059	7.95921	9.06264	16.1004	0.515868	0.954925
NM_178156.1	FUT8	3722	1332	2366	8.10685	15.7124	17.8936	31.784	0.515953	0.954687
NR_003584.2	SNHG8	659	1533	725	52.6964	27.1929	116.313	55.0076	1.93787	0.954474
NM_004446.2	EPRS	5083	10724	5072	47.7926	24.6639	105.489	49.8918	1.93775	0.954385
NM_003641.3	IFITM1	742	1576	2798	48.1145	93.2066	106.199	188.544	0.516214	0.95396
XM_001723486.1	LOC100130476	897	129	229	3.25778	6.31024	7.19064	12.7648	0.516268	0.953808
NM_032438.1	L3MBTL3	4267	653	1159	3.46669	6.71373	7.65175	13.581	0.516358	0.953557
NM_001007094.1	ZNF37A	7135	1910	904	6.06406	3.13168	13.3847	6.33497	1.93636	0.953347
NM_017514.3	PLXNA3	6847	1392	2470	4.60535	8.91661	10.165	18.0371	0.516492	0.953183
NM_152841.1	HPS4	4119	4214	1995	23.1754	11.9717	51.1532	24.217	1.93585	0.95297
NM_005009.2	NME4	1072	2773	1314	58.5975	30.2973	129.338	61.2873	1.93408	0.951651
XM_002343743.1	LOC100288432	1605	931	1649	13.1401	25.395	29.0031	51.3707	0.517428	0.95057
XM_002348060.1	LOC100291120	1605	931	1649	13.1401	25.395	29.0031	51.3707	0.517428	0.95057
NM_002818.2	PSME2	839	546	967	14.7419	28.4884	32.5387	57.6281	0.517472	0.950446
NM_018663.1	PXMP2	989	622	295	14.2468	7.37274	31.4459	14.9141	1.93237	0.950368
NM_014067.3	MACROD1	1292	778	369	13.6408	7.05939	30.1084	14.2802	1.9323	0.950318
NM_006403.3	NEDD9	4606	672	1190	3.30498	6.38596	7.29483	12.9179	0.517539	0.95026
NM_017832.3	C9orf6	1949	643	305	7.47349	3.86804	16.4956	7.82453	1.93211	0.950178
NR_027767.1	TNIK	777	100	177	2.91543	5.63061	6.43501	11.39	0.517783	0.949581
NM_001002811.1	PDE4DIP	5421	701	1240	2.92929	5.65386	6.4656	11.437	0.518104	0.948685
NR_024581.1	ASB13	2617	815	387	7.05469	3.65519	15.5713	7.39396	1.93005	0.948635
XM_002345443.1	LOC100292646	1600	926	1637	13.1104	25.289	28.9375	51.1562	0.518422	0.947801
NM_005918.2	MDH2	1337	9554	4540	161.874	83.932	357.292	169.783	1.92864	0.947581
NM_005811.3	GDF11	4313	1166	2059	6.12411	11.7999	13.5173	23.8697	0.518995	0.946207
NM_004708.2	PDCD5	606	822	391	30.7272	15.948	67.8218	32.2607	1.92671	0.946139
NM_032147.2	USP44	3519	5629	2678	36.2356	18.8102	79.9801	38.0506	1.92638	0.945891
NM_001005.3	RPS3	865	15379	7317	402.75	209.084	888.96	422.948	1.92627	0.945806
NM_001100829.1	TMEM170B	8466	2488	1184	6.65727	3.45682	14.6941	6.99268	1.92584	0.945486
NM_003910.3	BUD31	1073	2475	1178	52.2516	27.1362	115.331	54.8928	1.92553	0.945258
XM_372200.7	LOC389842	850	355	169	9.46092	4.9144	20.8824	9.94118	1.92514	0.944965
NM_004217.2	AURKB	1268	3148	1499	56.2392	29.2203	124.132	59.1088	1.92466	0.944604
NM_130844.1	WWOX	551	147	70	6.04352	3.14014	13.3394	6.35209	1.9246	0.944558
NM_033387.3	FAM78A	4006	884	1559	4.9988	9.61918	11.0334	19.4583	0.519669	0.944334
NM_003732.2	EIF4EBP3	737	506	241	15.5527	8.08263	34.3284	16.3501	1.92422	0.944273
XM_002345056.1	LOC100293107	1752	1408	671	18.2051	9.46654	40.1826	19.1495	1.9231	0.943431
NM_001127370.2	CDCA7L	3013	4704	2243	35.3665	18.4006	78.0617	37.222	1.92203	0.942627
NM_052853.3	ADCK2	2405	2170	1035	20.4394	10.6372	45.1143	21.5177	1.9215	0.942233
NM_001080407.2	GLB1L3	2995	1809	863	13.6825	7.12225	30.2003	14.4073	1.92109	0.941929
XR_078447.1	LOC729860	1591	1287	614	18.3245	9.53896	40.4463	19.296	1.92102	0.94187
NM_000377.2	WAS	1867	2639	4646	32.0198	61.5089	70.6749	124.424	0.520572	0.941829
NM_012453.2	TBL2	3079	1054	503	7.75452	4.03795	17.1159	8.16824	1.92041	0.941413
NM_001077395.1	DPH5	1829	1215	580	15.0483	7.83822	33.2149	15.8557	1.91986	0.941
NM_152995.4	NFXL1	3784	1560	745	9.33894	4.8664	20.6131	9.84408	1.91906	0.940402
NM_014636.1	RALGPS1	6415	1807	863	6.38095	3.3252	14.0842	6.72642	1.91897	0.940333
NM_015852.3	ZNF117	6484	905	1591	3.16177	6.06499	6.97872	12.2687	0.521314	0.939775
NM_024908.2	WDR76	2555	2740	1310	24.2931	12.6731	53.6204	25.636	1.9169	0.938778
NM_002106.3	H2AFZ	962	5370	2569	126.451	66.0073	279.106	133.524	1.91572	0.937884
NM_001018077.1	NR3C1	7377	3037	1453	9.32586	4.86843	20.5842	9.84818	1.91558	0.937781
NM_001099339.1	COMMD7	1949	793	1392	9.21691	17.6535	20.3438	35.7106	0.522102	0.937598
NM_001105079.1	FBRS	2846	2017	3540	16.0544	30.7448	35.4357	62.1926	0.522184	0.93737
NM_138452.2	DHRS1	1506	285	500	4.28691	8.20631	9.46215	16.6003	0.522391	0.936797
NM_002291.2	LAMB1	5939	2168	1038	8.26932	4.32003	18.2522	8.73884	1.91418	0.936727
XM_002344005.1	LOC100294270	668	122	214	4.13721	7.91845	9.13174	16.018	0.522477	0.936561
NM_001008708.2	CHAC2	1321	290	139	4.97301	2.60085	10.9765	5.26117	1.91207	0.935137
NM_181581.1	DUS4L	2280	509	244	5.05716	2.6452	11.1623	5.35088	1.91183	0.934953
NM_001142317.1	TXNL4B	2545	684	328	6.08825	3.18558	13.4381	6.44401	1.91119	0.934469
NM_031453.2	FAM107B	3832	2391	1147	14.1344	7.39845	31.1978	14.9661	1.91046	0.933917
NM_003870.3	IQGAP1	7309	8492	14862	26.3194	50.26	58.0928	101.669	0.523665	0.933283
NM_012298.2	CAND2	4301	1127	541	5.93579	3.10907	13.1016	6.28924	1.90918	0.932956
NM_017654.2	SAMD9	6938	1699	2972	5.54732	10.5881	12.2442	21.4183	0.523921	0.93258
NM_001839.3	CNN3	2108	1062	510	11.4124	5.98002	25.1898	12.0968	1.90843	0.932383
NM_012383.4	OSTF1	1329	1441	2520	24.562	46.8682	54.2137	94.8081	0.524064	0.932185
NM_024698.4	SLC25A22	2814	946	1654	7.61537	14.5283	16.8088	29.3888	0.524175	0.931878
NM_003150.3	STAT3	5014	7263	12696	32.8137	62.5872	72.4272	126.606	0.524288	0.931568
NM_001122671.1	CCBL1	1960	462	222	5.33961	2.79963	11.7857	5.66327	1.90726	0.931502
XM_002346737.1	LOC100290231	603	525	917	19.7227	37.5885	43.5323	76.0365	0.5247	0.930436
XR_078829.1	LOC100291980	587	296	517	11.4229	21.7699	25.2129	44.0375	0.524713	0.930398
NM_001105515.1	ABCC4	3115	709	341	5.15599	2.70582	11.3804	5.47352	1.90552	0.930183
XM_002347474.1	LOC100294429	501	106	51	4.79283	2.51614	10.5788	5.08982	1.90483	0.929664
NM_002539.1	ODC1	2087	7675	3694	83.3067	43.7499	183.876	88.5002	1.90416	0.929152
XM_002342583.1	LOC100289372	603	525	916	19.7227	37.5475	43.5323	75.9536	0.525273	0.928861
XM_002342203.1	LOC100289544	1170	1616	778	31.2881	16.436	69.0598	33.2479	1.90363	0.928754
XM_002348214.1	LOC100290520	1170	1616	778	31.2881	16.436	69.0598	33.2479	1.90363	0.928754
XM_002345536.1	LOC100292005	1170	1616	778	31.2881	16.436	69.0598	33.2479	1.90363	0.928754
NM_001924.2	GADD45A	1371	258	450	4.26291	8.11294	9.40919	16.4114	0.525446	0.928385
NM_000202.4	IDS	5902	2381	4152	9.1387	17.3885	20.1711	35.1745	0.525561	0.92807
NR_015451.1	LOC283267	3363	1426	687	9.60543	5.04932	21.2013	10.2141	1.90232	0.927761
NM_006253.4	PRKAB1	2442	2685	4681	24.9071	47.3801	54.9754	95.8436	0.525686	0.927726
NM_199357.1	ARHGAP11A	2517	1484	715	13.3559	7.02143	29.4795	14.2034	1.90217	0.927645
NM_022346.3	NCAPG	4740	4927	2374	23.5466	12.3796	51.9726	25.0422	1.90205	0.927558
NM_001009183.1	SIP1	1325	498	240	8.51408	4.47712	18.7925	9.0566	1.90169	0.92728
NM_001143906.1	TRAFD1	3235	913	1591	6.39323	12.1562	14.1113	24.5904	0.525922	0.927078
NM_001010878.1	C16orf91	1084	278	134	5.80951	3.05547	12.8229	6.18081	1.90135	0.927021
NM_005165.2	ALDOC	1685	3768	6563	50.6565	96.2732	111.81	194.748	0.526174	0.926388
NR_026978.1	HAUS1	1199	566	273	10.6935	5.6279	23.603	11.3845	1.90009	0.92607
NM_207112.1	HAGHL	1749	483	233	6.25578	3.29283	13.8079	6.66095	1.89982	0.925862
NR_003605.1	C20orf199	703	4056	1958	130.697	68.8431	288.478	139.26	1.89848	0.924846
NM_205767.1	C19orf70	954	1021	493	24.2438	12.7733	53.5115	25.8386	1.89802	0.924492
XM_002342257.1	LOC100288695	1282	184	320	3.25128	6.16971	7.17629	12.4805	0.526974	0.924197
NM_001144995.1	CCDC85C	5741	2000	966	7.89163	4.15904	17.4186	8.41317	1.89747	0.924074
NM_016076.3	PPPDE1	4144	4124	1992	22.5436	11.8815	49.7587	24.0347	1.89736	0.923995
NM_018208.2	ETNK2	2681	627	303	5.29779	2.7935	11.6934	5.65088	1.89647	0.923316
NM_194460.1	RNF126	1678	2493	1205	33.6554	17.75	74.2849	35.9058	1.89608	0.923018
NM_024832.3	RIN3	3917	901	1565	5.21069	9.87561	11.5011	19.977	0.527632	0.922395
NM_021035.2	ZNFX1	7463	2287	3972	6.94187	13.1552	15.3223	26.6113	0.527689	0.922241
NM_005567.3	LGALS3BP	2305	1752	3042	17.2182	32.6206	38.0043	65.987	0.527832	0.921849
NM_181715.1	CRTC2	2630	1054	1830	9.07839	17.1988	20.038	34.7909	0.52785	0.9218
NM_138383.2	MTSS1L	5039	2966	1435	13.3337	7.03899	29.4304	14.2389	1.89426	0.921637
NM_207521.1	RTN4	4180	6853	3316	37.1389	19.6084	81.9737	39.6651	1.89403	0.92146
NM_000407.4	GP1BB	969	374	181	8.74323	4.61698	19.2982	9.33953	1.89371	0.921217
NM_001145199.1	C12orf75	1400	1004	1742	16.2454	30.7555	35.8571	62.2143	0.52821	0.920817
NM_018231.1	SLC38A7	2807	362	628	2.92139	5.52994	6.44817	11.1863	0.528287	0.920606
XM_002348127.1	LOC100289935	662	147	255	5.03018	9.52106	11.1027	19.2598	0.528321	0.920512
XM_002344148.1	LOC100289593	1093	648	314	13.4301	7.10089	29.6432	14.3641	1.89133	0.919398
XM_002347843.1	LOC100291172	1093	648	314	13.4301	7.10089	29.6432	14.3641	1.89133	0.919398
XM_002345095.1	LOC100291993	1093	648	314	13.4301	7.10089	29.6432	14.3641	1.89133	0.919398
NM_006743.3	RBM3	1607	7472	3622	105.328	55.7103	232.483	112.694	1.89064	0.918877
NM_001130689.1	HMGB2	1472	12329	5977	189.734	100.364	418.784	203.023	1.89045	0.918731
NM_022163.3	MRPL46	1032	691	335	15.1678	8.02358	33.4787	16.2306	1.8904	0.918693
NM_001131015.1	CIZ1	2924	4523	2193	35.0407	18.5381	77.3427	37.5	1.89021	0.918543
NM_000942.4	PPIB	1058	9867	4791	211.263	111.929	466.304	226.418	1.88747	0.916453
NM_020820.3	PREX1	6715	2231	3859	7.52623	14.2047	16.6121	28.7342	0.529841	0.916368
NM_013442.1	STOML2	1319	5117	2485	87.8809	46.5677	193.973	94.2002	1.88717	0.916221
NM_021029.4	RPL36A	474	105	51	5.01805	2.65947	11.0759	5.37975	1.88686	0.915989
NR_024117.1	MSTO2P	2590	739	359	6.46351	3.42608	14.2664	6.9305	1.88656	0.915759
NM_020247.4	CABC1	2968	1210	588	9.23518	4.89685	20.3841	9.90566	1.88595	0.915288
NM_002473.4	MYH9	7598	42670	73704	127.218	239.77	280.798	485.022	0.530582	0.914352
XM_002342159.1	LOC100289621	672	91	157	3.06758	5.77475	6.77083	11.6815	0.531206	0.912657
XM_002347609.1	LOC100290369	672	91	157	3.06758	5.77475	6.77083	11.6815	0.531206	0.912657
XM_002345278.1	LOC100291690	672	91	157	3.06758	5.77475	6.77083	11.6815	0.531206	0.912657
NM_004073.2	PLK3	2398	320	552	3.02291	5.68975	6.67223	11.5096	0.53129	0.912428
NM_001162371.1	LOC728392	1769	269	464	3.44468	6.48326	7.60317	13.1148	0.531319	0.91235
NM_181659.1	NCOA3	8034	2523	4351	7.11393	13.3863	15.702	27.0787	0.531434	0.912038
NM_003272.3	GPR137B	2071	279	481	3.05174	5.74074	6.73588	11.6127	0.531594	0.911603
NM_013300.2	C12orf24	1548	1305	636	19.0969	10.1552	42.1512	20.5426	1.8805	0.91112
NM_006914.3	RORB	3649	2610	1272	16.2028	8.61621	35.7632	17.4294	1.8805	0.91112
NM_012340.3	NFATC2	3294	988	1702	6.7945	12.7714	14.997	25.8349	0.532008	0.910479
NM_212554.2	METTL10	2670	968	472	8.21274	4.36952	18.1273	8.83895	1.87955	0.910389
NM_032045.3	KREMEN1	2752	697	340	5.73731	3.05375	12.6635	6.17733	1.87878	0.909793
NM_001006.3	RPS3A	941	215	105	5.17575	2.75805	11.424	5.57917	1.87659	0.908116
NM_133439.2	TADA2A	1343	817	399	13.7807	7.34345	30.417	14.8548	1.87659	0.908116
NM_033301.1	RPL8	979	37514	18322	868.03	462.587	1915.93	935.751	1.87647	0.908021
NM_080738.3	EDARADD	2927	7940	3881	61.45	32.7736	135.634	66.2965	1.87499	0.906879
NM_181802.1	UBE2C	1508	1483	725	22.2774	11.8834	49.1711	24.0385	1.87467	0.906634
NM_015659.2	RSL1D1	5201	5540	2709	24.1294	12.8743	53.259	26.0431	1.87423	0.906294
NM_015316.2	PPP1R13B	5038	938	1611	4.21763	7.90388	9.30925	15.9885	0.533615	0.906128
NM_001131064.1	ACP2	739	99	170	3.03469	5.68601	6.69824	11.502	0.533712	0.905866
NM_022845.2	CBFB	3189	3627	6228	25.7642	48.2722	56.8674	97.6482	0.533728	0.905823
NM_001165937.1	STARD3	2869	2455	4213	19.3841	36.2964	42.7849	73.4228	0.534049	0.904956
NM_199440.1	HSPD1	2347	2141	1048	20.6646	11.037	45.6114	22.3264	1.8723	0.904815
NM_001040651.1	CD3D	646	6434	11039	225.617	422.377	497.988	854.412	0.534161	0.904653
NM_021202.1	TP53INP2	4175	622	1067	3.37488	6.317	7.4491	12.7784	0.534253	0.904405
NM_001024.3	RPS21	423	21667	10611	1160.33	620.039	2561.11	1254.26	1.87139	0.904108
NM_003253.2	TIAM1	7308	1660	2847	5.14557	9.62924	11.3574	19.4787	0.534369	0.904091
NM_032889.3	MFSD5	1781	371	636	4.71883	8.82666	10.4155	17.8551	0.534611	0.903439
NM_018143.1	KLHL11	2355	908	445	8.73412	4.67059	19.2781	9.44798	1.87002	0.903056
NM_001128221.1	VGLL4	3467	2906	4979	18.9874	35.497	41.9094	71.8056	0.534902	0.902653
NM_001128301.1	LYRM1	1677	828	406	11.1846	5.98406	24.6869	12.1049	1.86907	0.90232
XM_036729.7	USP41	1057	212	104	4.54344	2.43199	10.0284	4.91958	1.8682	0.901649
NM_183011.1	CREM	2550	544	267	4.83262	2.58806	10.6667	5.23529	1.86728	0.900936
NM_000387.4	SLC25A20	1908	502	859	5.96004	11.128	13.1551	22.5105	0.535589	0.900802
NM_207340.1	ZDHHC24	1335	904	1546	15.3395	28.6241	33.8577	57.9026	0.535895	0.899977
NM_022060.2	ABHD4	2574	403	689	3.54667	6.61628	7.82828	13.3838	0.536052	0.899555
NM_001130021.1	ATP6V0A1	4257	1215	2077	6.46542	12.0597	14.2706	24.3951	0.536119	0.899376
NM_019558.2	HOXD8	1902	407	200	4.84739	2.5991	10.6993	5.25762	1.86503	0.899198
NM_016046.3	EXOSC1	1164	1628	800	31.6829	16.9879	69.9313	34.3643	1.86503	0.899198
NM_173793.3	C22orf39	1306	1225	602	21.2479	11.3935	46.8989	23.0475	1.86492	0.899115
NM_001539.2	DNAJA1	1557	2979	5091	43.3417	80.8198	95.6647	163.487	0.536276	0.898952
XM_002342359.1	LOC100289441	1534	419	206	6.18746	3.31929	13.6571	6.71447	1.86409	0.898475
XM_002345632.1	LOC100293634	1534	419	206	6.18746	3.31929	13.6571	6.71447	1.86409	0.898475
NM_001080530.2	SNX29	7098	873	1491	2.78614	5.19212	6.14962	10.503	0.536609	0.898058
NM_006148.2	LASP1	4160	7709	13164	41.9787	78.2164	92.6562	158.221	0.5367	0.897814
NM_025250.2	TTYH3	4898	3751	6405	17.3481	32.3224	38.2911	65.3838	0.536721	0.897755
NM_022366.2	TFB2M	1821	484	826	6.02087	11.2117	13.2894	22.6798	0.537015	0.896966
NM_002319.3	LRCH4	3241	2300	3925	16.0758	29.9339	35.4829	60.5523	0.537043	0.89689
NM_031965.2	GSG2	2831	1552	764	12.4187	6.67047	27.4108	13.4935	1.86174	0.896653
NM_001031733.2	CALML4	4570	592	1010	2.93447	5.46271	6.47702	11.0503	0.537182	0.896517
NM_030911.1	CDADC1	3406	517	882	3.43851	6.40069	7.58955	12.9477	0.537209	0.896446
NM_171998.2	RAB39B	3542	918	452	5.87108	3.15423	12.9588	6.38058	1.86134	0.89634
NM_144665.2	SESN3	2011	455	776	5.12535	9.5379	11.3128	19.2939	0.537367	0.896021
NM_173690.3	SCAI	12322	4209	2073	7.73788	4.15835	17.0792	8.41178	1.8608	0.895926
NM_001048194.1	RCC1	2563	3308	1630	29.2375	15.7196	64.5337	31.7987	1.85994	0.895256
NM_022827.2	SPATA20	2672	1178	2007	9.98695	18.5658	22.0434	37.5561	0.537922	0.894532
NM_001005377.1	PLAUR	1430	189	322	2.99399	5.56574	6.60839	11.2587	0.537931	0.894506
XM_002343464.1	LOC100288650	676	91	155	3.04943	5.66745	6.73077	11.4645	0.53806	0.894161
NM_001039841.1	ARHGAP11B	1058	657	324	14.0671	7.56942	31.0491	15.3119	1.85841	0.894068
NM_024798.2	SNX22	3659	4984	2458	30.856	16.6044	68.106	33.5884	1.85831	0.893988
NM_016121.3	KCTD3	3995	1295	639	7.34306	3.95355	16.2078	7.9975	1.85733	0.893233
NM_001146082.1	MBOAT7	2063	1087	1850	11.9359	22.1654	26.3451	44.8376	0.538491	0.893005
NM_001128917.1	TOMM40	1841	954	471	11.7387	6.32368	25.9098	12.792	1.8563	0.892431
NM_138621.3	BCL2L11	5162	1225	605	5.37579	2.89695	11.8656	5.86013	1.85567	0.891943
NM_014838.2	ZBED4	6983	11565	5713	37.517	20.2221	82.8082	40.9065	1.85525	0.891614
NM_001039619.1	PRMT5	2500	3697	1827	33.4991	18.0635	73.94	36.54	1.85452	0.891047
NM_001163812.1	C10orf2	3730	1242	614	7.54287	4.06876	16.6488	8.23056	1.85385	0.890523
NM_014445.3	SERP1	3220	7386	3655	51.961	28.0566	114.689	56.7547	1.85201	0.889091
NM_032548.2	ABTB1	2045	495	840	5.48322	10.1529	12.1027	20.5379	0.540066	0.888792
NM_001012635.1	IL32	903	1069	1814	26.8172	49.6538	59.1916	100.443	0.540084	0.888744
NM_014339.4	IL17RA	3471	1992	3380	13.0005	24.0694	28.6949	48.6891	0.540124	0.888637
NM_138967.2	SCAMP5	3450	501	850	3.2896	6.0898	7.26087	12.3188	0.540182	0.888483
NM_000918.3	P4HB	2628	8932	4423	76.9923	41.6001	169.939	84.1514	1.85077	0.888127
NM_001048198.1	SNHG3-RCC1	2745	3431	1699	28.3141	15.2987	62.4954	30.9472	1.85075	0.888112
NM_001143819.1	TPCN1	5540	919	1558	3.75777	6.95121	8.29422	14.0614	0.540591	0.88739
XM_001717113.2	LOC100134017	706	105	178	3.36906	6.23187	7.43626	12.6062	0.540618	0.887319
XM_002342198.1	LOC100288694	807	364	617	10.2177	18.8979	22.5527	38.228	0.540676	0.887163
XM_002345517.1	LOC100292606	807	364	617	10.2177	18.8979	22.5527	38.228	0.540676	0.887163
XM_002348050.1	LOC100289713	874	121	205	3.13616	5.79756	6.9222	11.7277	0.540944	0.886448
NM_001143936.1	C15orf61	1329	613	304	10.4486	5.65395	23.0625	11.4372	1.84803	0.885984
NM_006459.3	ERLIN1	3493	2212	1097	14.3453	7.76267	31.6633	15.7028	1.84799	0.885957
NM_207354.1	ANKRD13D	2246	1547	2620	15.6029	28.8333	34.439	58.3259	0.541141	0.885925
NM_134421.1	HPCAL1	1943	1294	2191	15.0864	27.8723	33.299	56.3819	0.541269	0.885583
NM_172230.2	SYVN1	3112	2879	1429	20.9569	11.35	46.2564	22.9595	1.84642	0.884731
NM_133644.2	GTPBP3	2718	1394	692	11.6182	6.29303	25.6439	12.7299	1.8462	0.884555
NR_026962.1	LOC284900	975	284	141	6.59839	3.57452	14.5641	7.23077	1.84595	0.884365
NM_032118.2	WDR54	1238	1711	850	31.3079	16.9708	69.1034	34.3296	1.84481	0.883474
XM_002346204.1	LOC100292449	592	194	328	7.42342	13.6948	16.3851	27.7027	0.542062	0.88347
NM_016491.3	MRPL37	1505	4266	2120	64.2108	34.8179	141.728	70.4319	1.84419	0.882988
XM_002345516.1	LOC100292577	545	71	120	2.95111	5.44237	6.51376	11.0092	0.542248	0.882975
NR_002312.1	RPPH1	345	58	98	3.80832	7.02118	8.4058	14.2029	0.542404	0.88256
NM_032333.4	C10orf58	1795	816	406	10.2979	5.59068	22.7298	11.3092	1.84198	0.881258
NM_001040457.1	RHBDD2	1901	3961	1972	47.2005	25.6406	104.182	51.8674	1.84085	0.880374
NM_018182.2	C17orf63	4249	1053	1776	5.61391	10.3314	12.3912	20.899	0.543383	0.879957
NM_005480.3	TROAP	2650	2044	1018	17.4727	9.49522	38.566	19.2075	1.84015	0.879826
XM_002345506.1	LOC100292402	716	169	285	5.34685	9.83864	11.8017	19.9022	0.543454	0.87977
NM_007107.2	SSR3	3105	3968	1977	28.949	15.7379	63.8969	31.8357	1.83944	0.879268
XM_002345902.1	LOC100292154	920	331	558	8.15012	14.9916	17.9891	30.3261	0.543644	0.879265
NM_024787.2	RNF122	1891	716	1207	8.5772	15.7768	18.9318	31.9143	0.543659	0.879225
XR_039081.2	LOC100131735	1914	869	433	10.2849	5.59177	22.7011	11.3114	1.8393	0.879158
NM_015416.3	LETMD1	2159	2639	1315	27.6892	15.0548	61.1163	30.4539	1.83922	0.879097
NM_018049.1	PLEKHJ1	1230	2319	1156	42.709	23.2303	94.2683	46.9919	1.8385	0.87853
NM_014505.4	KCNMB4	1651	228	384	3.12832	5.74893	6.90491	11.6293	0.544158	0.877904
NM_031216.3	SEH1L	3556	3396	1694	21.6337	11.7748	47.7503	23.8189	1.83728	0.877571
NM_001003827.1	TRIM34	2355	313	527	3.01077	5.53124	6.64544	11.189	0.544321	0.877472
NM_001018136.1	NME1-NME2	1120	4521	2256	91.4409	49.7879	201.83	100.714	1.83661	0.877044
NM_018946.3	NANS	1272	1539	768	27.4079	14.9237	60.4953	30.1887	1.83653	0.876984
NM_032307.3	C9orf64	2516	597	298	5.37511	2.92758	11.8641	5.9221	1.83603	0.876587
NM_000320.2	QDPR	1680	705	352	9.50613	5.17889	20.9821	10.4762	1.83556	0.876217
NM_013275.4	ANKRD11	9442	10160	5073	24.3755	13.2802	53.8022	26.864	1.83548	0.876158
NM_001145775.1	FKBP5	4000	2223	1110	12.5894	6.85908	27.7875	13.875	1.83543	0.876117
NM_003629.3	PIK3R3	5764	2888	4856	11.35	20.8237	25.052	42.1235	0.545054	0.875529
NM_001048210.1	CLCC1	4885	1259	629	5.83828	3.18265	12.8864	6.43808	1.83441	0.875315
NM_002693.2	POLG	4519	8630	4313	43.2606	23.5907	95.4857	47.7207	1.8338	0.874838
XM_002342196.1	LOC100288638	545	72	121	2.99268	5.48772	6.6055	11.1009	0.545341	0.874769
NM_003006.3	SELPLG	2581	4041	2020	35.467	19.3449	78.2836	39.1321	1.83341	0.874526
NM_018122.3	DARS2	3226	1248	624	8.76343	4.78105	19.3428	9.67142	1.83295	0.874169
NM_001540.3	HSPB1	925	704	352	17.2407	9.40598	38.0541	19.027	1.83295	0.874169
XM_002342170.1	LOC100288102	500	142	71	6.43343	3.50987	14.2	7.1	1.83295	0.874169
NM_001135861.1	PHPT1	1288	1258	629	22.1253	12.0708	48.8354	24.4177	1.83295	0.874169
NM_144608.1	HEXIM2	1346	448	224	7.53975	4.11345	16.6419	8.32095	1.83295	0.874169
NM_013392.2	NRBP1	2239	2252	3781	22.7844	41.7403	50.2903	84.435	0.545862	0.873392
XM_002345640.1	LOC100293186	1091	616	1034	12.7903	23.426	28.231	47.3877	0.545986	0.873065
NM_015205.2	ATP11A	8904	3255	5463	8.28114	15.1652	18.2783	30.6772	0.546061	0.872867
NM_152271.3	LONRF1	3628	1306	654	8.15455	4.45567	17.9989	9.01323	1.83015	0.871961
NM_004604.3	STX4	1420	883	1481	14.0863	25.7792	31.0915	52.1479	0.54642	0.871918
NM_001197.3	BIK	975	408	684	9.47937	17.3402	20.9231	35.0769	0.54667	0.871258
NM_015230.2	ARAP2	7451	1180	1978	3.5875	6.56168	7.9184	13.2734	0.546735	0.871087
NM_001004.3	RPLP2	517	19902	9973	872.028	476.802	1924.76	964.507	1.82891	0.870983
NM_152755.1	CNPY4	1566	247	414	3.57297	6.53449	7.88633	13.2184	0.546786	0.870951
NM_032194.1	RPF2	1091	409	205	8.49225	4.64443	18.7443	9.39505	1.82848	0.870646
NM_001135213.1	GIT2	5476	2740	4591	11.3347	20.7227	25.0183	41.9193	0.546971	0.870464
NR_026750.1	DKFZp686O24166	6473	1542	773	5.39638	2.95173	11.911	5.97096	1.82821	0.870431
NM_022483.4	C5orf28	2795	770	386	6.24069	3.41357	13.7746	6.90519	1.8282	0.870426
NM_002360.3	MAFK	3391	3004	1506	20.0676	10.9774	44.2937	22.2058	1.82808	0.870332
NM_025029.2	FAM128B	774	2431	1219	71.1489	38.9283	157.041	78.7468	1.82769	0.870021
NM_006597.3	HSPA8	2304	7443	12467	73.1795	133.747	161.523	270.551	0.547151	0.869989
NM_024629.3	MLF1IP	2585	2329	1168	20.4095	11.1683	45.0484	22.5919	1.82746	0.869839
NM_014875.2	KIF14	7384	3744	1878	11.486	6.28647	25.3521	12.7167	1.8271	0.869552
XM_001732883.2	LOC100133591	1075	470	787	9.90406	18.0954	21.8605	36.6047	0.547324	0.869534
NM_004064.3	CDKN1B	2443	3899	1956	36.1538	19.7901	79.7994	40.0327	1.82686	0.869367
NM_021872.2	CDC25B	3622	6074	3048	37.9883	20.8003	83.8487	42.0762	1.82634	0.868953
NM_203433.1	PSMG1	1096	1311	658	27.0967	14.8395	59.8084	30.0182	1.82599	0.868677
NM_022051.2	EGLN1	7190	2060	1034	6.49026	3.55463	14.3255	7.19054	1.82586	0.868577
NM_014655.2	SLC25A44	3698	1395	2334	8.54538	15.6004	18.8615	31.5576	0.547765	0.868371
NR_028090.1	LOC202781	2303	490	246	4.81977	2.64024	10.6383	5.34086	1.8255	0.868292
NM_005687.3	FARSB	2260	3268	1641	32.7565	17.9475	72.3009	36.3053	1.82513	0.868001
NM_052850.2	GADD45GIP1	753	1864	936	56.0757	30.7244	123.772	62.1514	1.82512	0.86799
NM_018112.1	TMEM38B	2101	906	455	9.76846	5.35289	21.5612	10.8282	1.82489	0.867813
NM_001270.2	CHD1	6537	8590	4315	29.7673	16.3157	65.7029	33.0044	1.82446	0.867466
NM_012288.3	TRAM2	7153	2491	4164	7.88877	14.3888	17.4123	29.1067	0.548257	0.867076
NR_015339.1	C8orf83	3587	1009	507	6.37212	3.49365	14.0647	7.06719	1.82391	0.867037
NM_017750.3	RETSAT	3369	548	916	3.68471	6.72044	8.13298	13.5945	0.548285	0.867003
XR_078433.1	LOC100289666	5094	1916	963	8.52041	4.67273	18.8064	9.4523	1.82343	0.866659
XR_079282.1	LOC100289848	5094	1916	963	8.52041	4.67273	18.8064	9.4523	1.82343	0.866659
XM_002343794.1	LOC100288980	856	152	254	4.02248	7.33437	8.8785	14.8364	0.548442	0.866588
NM_015513.3	CRELD1	2757	891	448	7.32091	4.01647	16.1589	8.12477	1.82272	0.866095
NM_006613.3	GRAP	2115	491	820	5.2589	9.58311	11.6076	19.3853	0.548768	0.865732
NM_024100.3	WDR18	1570	2094	1054	30.2135	16.5937	66.6879	33.5669	1.82078	0.864555
NM_001142350.1	THOC6	1325	1418	714	24.2429	13.3194	53.5094	26.9434	1.82012	0.86403
NM_138418.2	FAM195A	939	548	276	13.2202	7.26518	29.18	14.6965	1.81967	0.863676
NM_003893.4	LDB1	2333	3144	5241	30.5275	55.5268	67.3811	112.323	0.549781	0.863072
NM_020468.3	SNX14	3387	1253	2088	8.38031	15.2377	18.4972	30.8237	0.549973	0.862567
NM_018116.2	MSTO1	2476	978	493	8.94772	4.92152	19.7496	9.95557	1.81808	0.862416
NM_006026.3	H1FX	1543	8913	4496	130.852	72.0217	288.82	145.69	1.81685	0.861438
NM_199069.1	NDUFAF3	1404	2698	1361	43.531	23.9604	96.0826	48.4687	1.81679	0.861392
XM_002348034.1	LOC100291105	385	203	338	11.9443	21.7	26.3636	43.8961	0.550428	0.861375
NM_021259.2	TMEM8A	3701	1241	2066	7.59586	13.7979	16.7657	27.9114	0.550507	0.861168
NM_001032410.1	USP16	3090	2530	1277	18.5475	10.2149	40.9385	20.6634	1.81573	0.860548
NM_024699.1	ZFAND1	1815	1547	781	19.308	10.636	42.6171	21.5152	1.81535	0.860247
XM_001732864.1	LOC100128816	1021	412	208	9.14104	5.03548	20.1763	10.1861	1.81533	0.86023
NM_003321.4	TUFM	2115	6777	3422	72.5857	39.992	160.213	80.8983	1.81501	0.859976
NM_032351.3	MRPL45	1734	1820	919	23.7764	13.0999	52.4798	26.4994	1.815	0.85997
XM_002345394.1	LOC100292304	1764	306	509	3.92959	7.13218	8.67347	14.4274	0.550966	0.859965
NM_205842.1	NCKAP1	4694	1208	610	5.82972	3.21211	12.8675	6.49766	1.81492	0.859908
NM_004564.1	PET112L	2069	802	405	8.78088	4.83835	19.3813	9.78734	1.81485	0.859849
NM_001135154.1	SLC39A14	1815	1077	544	13.442	7.40841	29.6694	14.9862	1.81442	0.859508
NM_001102366.1	C14orf159	3203	1118	1859	7.90695	14.3458	17.4524	29.0197	0.551167	0.859438
NM_006759.3	UGP2	2212	1982	1002	20.2975	11.1966	44.8011	22.6492	1.81283	0.858243
NM_006962.1	ZNF182	3642	915	1520	5.69122	10.3159	12.5618	20.8677	0.551694	0.858059
NM_006301.2	MAP3K12	3407	843	1400	5.60505	10.1568	12.3716	20.5459	0.551849	0.857654
NM_001212.3	C1QBP	1177	6378	3226	122.753	67.7471	270.943	137.043	1.81193	0.857526
XM_002345933.1	LOC100292902	403	81	41	4.55307	2.51467	10.0496	5.08685	1.8106	0.856467
NM_001428.2	ENO1	1834	56782	28745	701.351	387.406	1548.04	783.67	1.81038	0.856291
NM_000206.1	IL2RG	1469	7921	13141	122.147	221.111	269.605	447.277	0.552424	0.856152
XM_002344180.1	LOC100286995	1852	334	554	4.08535	7.39387	9.01728	14.9568	0.552532	0.855869
NM_020242.2	KIF15	4917	4243	2149	19.5478	10.8029	43.1462	21.8528	1.8095	0.855588
NM_170726.2	ALDH4A1	2415	436	723	4.08972	7.39987	9.02692	14.9689	0.552674	0.855499
NM_003627.4	SLC43A1	2556	2270	1150	20.1182	11.1209	44.4053	22.4961	1.80904	0.855227
NM_020744.2	MTA3	1895	1417	718	16.9389	9.36523	37.3879	18.9446	1.8087	0.854953
NM_016836.3	RBMS1	4358	1011	1674	5.25518	9.49448	11.5994	19.2061	0.553499	0.853348
NM_001135162.1	COMT	2307	3643	1848	35.7714	19.7996	78.9554	40.052	1.80667	0.853331
NM_019042.3	PUS7	3527	810	411	5.2024	2.88031	11.4828	5.82648	1.80619	0.852952
NM_001085365.1	FAM128A	716	2118	1075	67.0096	37.1106	147.905	75.0698	1.80567	0.852535
NM_139178.3	ALKBH3	1604	1381	701	19.5035	10.8023	43.0486	21.8516	1.8055	0.852396
NM_152240.1	ZMAT3	2352	761	1259	7.32945	13.231	16.1777	26.7645	0.553962	0.852141
NM_015084.2	MRPS27	2831	3806	1934	30.4546	16.8857	67.2201	34.1575	1.80357	0.850857
NM_015584.3	POLDIP2	2757	4707	2392	38.6751	21.4451	85.3645	43.3805	1.80345	0.850759
NM_016194.3	GNB5	3122	1462	743	10.6081	5.88246	23.4145	11.8994	1.80335	0.850678
NM_030674.3	SLC38A1	8593	17547	8924	46.2575	25.6695	102.101	51.926	1.80204	0.849631
NM_147184.1	TP53I3	1250	175	289	3.17141	5.71467	7	11.56	0.554959	0.849546
XM_002348055.1	LOC100290885	789	173	88	4.96699	2.75682	10.9632	5.57668	1.80171	0.849365
NM_018660.2	ZNF395	4867	2615	1331	12.1712	6.75958	26.8646	13.6737	1.80059	0.848469
NM_001166102.1	NDUFV1	1624	7764	3952	108.299	60.1498	239.039	121.675	1.80049	0.848386
NM_152490.2	B3GALNT2	4778	3430	1746	16.2619	9.03236	35.8937	18.2712	1.80041	0.848324
NM_170739.2	MRPL11	1725	1487	757	19.5275	10.847	43.1014	21.942	1.80026	0.848208
NM_032346.1	PDCD2L	1188	703	358	13.4049	7.44851	29.5875	15.0673	1.79967	0.847734
NM_002881.2	RALB	2303	695	1146	6.8362	12.2997	15.089	24.8806	0.555803	0.847353
NM_181353.1	ID1	1249	371	189	6.72877	3.74027	14.8519	7.56605	1.79901	0.847202
NM_002904.5	RDBP	1587	3168	1614	45.2202	25.1379	99.811	50.8507	1.79888	0.847101
NM_005188.2	CBL	11382	6857	11303	13.6471	24.5459	30.1221	49.653	0.555983	0.846888
NM_015987.3	HEBP1	1213	255	130	4.76215	2.64902	10.5111	5.35862	1.7977	0.846154
NM_002908.2	REL	2624	492	810	4.24742	7.62999	9.375	15.4345	0.556674	0.845095
NM_006079.3	CITED2	1954	404	665	4.68361	8.41202	10.3378	17.0164	0.556776	0.84483
NM_015469.1	NIPSNAP3A	1684	860	439	11.5686	6.44355	25.5344	13.0344	1.79537	0.844284
NM_015414.3	RPL36	563	10935	5584	439.982	245.155	971.137	495.915	1.79471	0.843751
NM_023936.1	MRPS34	1032	2385	1218	52.3519	29.1723	115.552	59.0116	1.79458	0.843644
NR_028085.1	UFSP2	2383	1286	657	12.2248	6.81466	26.9828	13.7851	1.79389	0.843094
NM_194451.1	LIAS	1651	364	186	4.99434	2.78464	11.0236	5.63295	1.79353	0.842805
NM_017709.3	FAM46C	5791	3166	1618	12.3846	6.90602	27.3355	13.97	1.7933	0.842618
NM_153713.1	LIX1L	1485	850	1395	12.9663	23.2194	28.6195	46.9697	0.558426	0.840562
NM_024598.2	C16orf57	2308	2323	3812	22.8001	40.8244	50.325	82.5823	0.558492	0.84039
NM_145266.4	NUDCD2	989	1223	626	28.0127	15.6452	61.8301	31.6481	1.7905	0.840359
NM_033161.2	SURF4	3022	8757	14367	65.6425	117.51	144.887	237.707	0.558612	0.840081
NM_014042.2	C11orf51	893	1867	956	47.3606	26.4612	104.535	53.5274	1.78981	0.839808
NM_006833.4	COPS6	1459	4304	2204	66.8253	37.3387	147.498	75.5312	1.78971	0.839723
NM_032306.2	ALKBH7	1123	1455	746	29.3499	16.4196	64.7818	33.2146	1.7875	0.83794
NM_007209.3	RPL35	480	3712	1904	175.183	98.0457	386.667	198.333	1.78674	0.837332
NM_014430.2	CIDEB	2280	744	1218	7.392	13.2043	16.3158	26.7105	0.559818	0.836971
NM_002235.3	KCNA6	6056	983	1609	3.67698	6.56709	8.11592	13.2843	0.55991	0.836732
NM_014701.2	SECISBP2L	6863	1916	3136	6.3242	11.2944	13.9589	22.8472	0.559939	0.836659
NM_019034.2	RHOF	2481	1288	2107	11.7602	20.9914	25.9573	42.4627	0.560238	0.835889
NM_001083536.1	FGD3	3513	1878	3070	12.1099	21.6005	26.7293	43.6948	0.560632	0.834873
XM_002345803.1	LOC100292322	900	216	111	5.4367	3.04848	12	6.16667	1.78341	0.83464
NM_002519.2	NPAT	6036	1638	2677	6.14736	10.9623	13.5686	22.1753	0.560772	0.834513
NM_182689.1	EFNA4	1123	216	353	4.35711	7.76959	9.6171	15.7168	0.56079	0.834468
NM_000051.3	ATM	13311	6453	10543	10.9818	19.5775	24.2394	39.6026	0.560943	0.834075
NM_005851.3	CDK2AP2	1414	3324	1709	53.252	29.8742	117.539	60.4314	1.78254	0.833937
NR_003239.1	SNHG11	1114	387	199	7.86955	4.41541	17.3698	8.93178	1.78229	0.833734
NM_001077198.1	ATG9A	3842	1578	2577	9.30409	16.5791	20.5362	33.5372	0.561195	0.833427
NM_033238.2	PML	5669	2641	4312	10.5532	18.8008	23.2933	38.0314	0.56132	0.833104
XM_001718914.2	LOC100130009	318	173	89	12.3238	6.91777	27.2013	13.9937	1.78146	0.833064
NM_031299.4	CDCA3	1184	725	373	13.8711	7.78682	30.6166	15.7517	1.78135	0.832974
NM_001135147.1	SLC39A8	4149	2324	3793	12.6887	22.5966	28.0067	45.7098	0.561532	0.832561
NM_017918.4	CCDC109B	1314	1836	945	31.652	17.7762	69.863	35.9589	1.78058	0.832349
NM_016245.3	HSD17B11	1915	1447	745	17.1168	9.61591	37.7807	19.4517	1.78005	0.831921
NM_005733.2	KIF20A	3514	2834	1460	18.2693	10.2696	40.3244	20.774	1.77897	0.83104
NM_032831.2	ORAI2	10793	1858	3029	3.89967	6.93682	8.60743	14.0322	0.56217	0.830922
NM_001005369.1	MTIF2	3002	1867	962	14.0883	7.92077	31.0959	16.0227	1.77865	0.830782
NM_001163817.1	DHCR7	2675	6418	3307	54.3501	30.5572	119.963	61.8131	1.77863	0.830769
NM_018130.2	SHQ1	2896	2476	1276	19.3676	10.8907	42.7486	22.0304	1.77837	0.830552
NM_001130050.1	DOCK9	4162	551	898	2.99898	5.33307	6.61941	10.7881	0.562337	0.830494
NM_032737.2	LMNB2	4711	10019	5164	48.1765	27.0942	106.336	54.8079	1.77811	0.830346
NM_001144903.1	TM6SF1	1838	970	500	11.955	6.724	26.3874	13.6017	1.77796	0.830225
NM_024319.2	C1orf35	1323	1092	563	18.6976	10.5184	41.2698	21.2774	1.7776	0.829935
NM_032862.3	TIGD5	2292	667	344	6.59227	3.70977	14.5506	7.50436	1.777	0.829447
NM_001516.3	GTF2H3	1523	950	490	14.1302	7.95242	31.1884	16.0867	1.77684	0.829315
XM_001716385.2	LOC728896	670	717	370	24.242	13.6499	53.5075	27.6119	1.77598	0.828617
NM_004451.3	ESRRA	2248	443	721	4.46407	7.9276	9.8532	16.0365	0.563105	0.828524
NM_152903.4	KBTBD6	5293	1116	576	4.77624	2.68982	10.5422	5.44115	1.77567	0.828365
NM_020451.2	SEPN1	4411	930	480	4.77606	2.68972	10.5418	5.44094	1.77567	0.828365
NM_001951.3	E2F5	1764	523	270	6.71625	3.78328	14.8243	7.65306	1.77525	0.82802
NM_015421.3	TMEM186	1483	486	251	7.42368	4.18346	16.3857	8.46258	1.77453	0.827438
NM_016343.3	CENPF	10444	17420	8997	37.7838	21.2929	83.3972	43.0726	1.77448	0.827397
XM_001718187.1	LOC100131311	1006	1006	1636	22.6529	40.1965	50	81.3121	0.563554	0.827374
XM_002342453.1	LOC100288697	621	515	266	18.7862	10.5875	41.4654	21.4171	1.77438	0.827315
NM_005505.4	SCARB1	2793	1748	903	14.1773	7.99134	31.2925	16.1654	1.77409	0.827076
NM_021089.2	ZNF8	2237	604	982	6.11639	10.8505	13.5002	21.949	0.563698	0.827006
NM_018323.3	PI4K2B	3646	1655	855	10.2827	5.79632	22.6961	11.7252	1.774	0.827004
NM_138810.2	TAGAP	1360	300	155	4.99697	2.81706	11.0294	5.69853	1.77382	0.826863
NM_004990.2	MARS	2829	13793	7127	110.446	62.2697	243.779	125.963	1.77367	0.826738
XM_940791.2	LOC651610	8915	4890	7946	12.4254	22.0308	27.4257	44.5653	0.564003	0.826226
NM_053004.2	GNB1L	1556	739	382	10.7587	6.06816	23.7468	12.2751	1.77297	0.82617
NM_002497.2	NEK2	2156	739	382	7.76461	4.37943	17.1382	8.859	1.77297	0.82617
NM_001080546.1	TMEM218	2130	470	243	4.99853	2.81987	11.0329	5.70423	1.77261	0.825873
NM_018142.2	INTS10	2570	2924	1513	25.7732	14.5515	56.8872	29.4358	1.77117	0.8247
NM_173595.3	ANKRD52	8764	4371	7094	11.298	20.0075	24.9372	40.4724	0.564691	0.824467
XM_002347712.1	LOC100291031	920	114	185	2.80699	4.97035	6.19565	10.0543	0.564747	0.824323
XM_002344985.1	LOC100291905	920	114	185	2.80699	4.97035	6.19565	10.0543	0.564747	0.824323
NM_006845.3	KIF2C	2932	5145	2663	39.7508	22.4497	87.7387	45.4127	1.77066	0.824287
NM_005897.2	IPP	3309	738	382	5.05224	2.85345	11.1514	5.77214	1.77057	0.824217
NR_026846.1	LOC285074	2252	877	454	8.82176	4.983	19.4716	10.0799	1.77037	0.824053
NM_175744.4	RHOC	1432	2580	4186	40.8132	72.2536	90.0838	146.159	0.564861	0.824032
NM_138820.2	HIGD2A	635	1439	745	51.3347	28.9992	113.307	58.6614	1.77021	0.823923
NR_024435.1	LOC100133991	1275	209	339	3.7133	6.57192	8.19608	13.2941	0.565025	0.823614
NM_001014445.1	NLE1	2760	2348	1216	19.2714	10.89	42.5362	22.029	1.76964	0.823458
NM_001142799.1	C17orf49	799	769	1247	21.8024	38.5765	48.1227	78.035	0.565172	0.823237
XM_002343586.1	LOC100287000	837	309	501	8.3629	14.795	18.4588	29.9283	0.565252	0.823035
NM_016447.2	MPP6	2228	525	272	5.33787	3.01757	11.7819	6.10413	1.76893	0.82288
NM_001009943.2	ANKRD16	1624	359	186	5.00763	2.83094	11.053	5.7266	1.7689	0.82285
NM_001011.3	RPS7	754	469	243	14.0905	7.96596	31.1008	16.1141	1.76884	0.8228
NM_012140.3	SLC25A10	1984	1406	729	16.0534	9.08215	35.4335	18.372	1.76758	0.821775
NM_001139457.1	BCAP31	1843	2307	3737	28.3561	50.1188	62.5882	101.384	0.565777	0.821694
NM_006721.2	ADK	2043	646	335	7.16289	4.05303	15.8101	8.19873	1.76729	0.821542
NM_022750.2	PARP12	3852	949	1537	5.5809	9.86258	12.3183	19.9507	0.565866	0.821468
NM_001007214.1	CACYBP	2910	1473	764	11.4666	6.48938	25.3093	13.1271	1.76698	0.821282
NM_138785.3	C6orf72	1152	721	374	14.1777	8.02458	31.2934	16.2326	1.76679	0.82113
NM_148954.2	PSMB9	1030	756	1224	16.6268	29.3729	36.699	59.4175	0.566059	0.820977
NM_014299.2	BRD4	4692	6458	3351	31.1791	17.653	68.8193	35.7097	1.76622	0.820665
XM_002347807.1	LOC100291240	793	215	348	6.14171	10.847	13.5561	21.942	0.566214	0.820582
XM_002345088.1	LOC100292010	793	215	348	6.14171	10.847	13.5561	21.942	0.566214	0.820582
NM_005263.3	GFI1	2837	2499	1297	19.954	11.3001	44.043	22.8587	1.76582	0.820341
XM_002347688.1	LOC100290663	598	578	300	21.8953	12.4	48.3278	25.0836	1.76574	0.820276
NM_213720.1	CHCHD10	758	341	177	10.1908	5.77174	22.4934	11.6755	1.76564	0.820191
NM_001042423.1	SLC16A3	2058	586	948	6.45025	11.3859	14.2371	23.0321	0.566514	0.819818
NM_001003408.1	ABLIM1	7800	7066	11431	20.5212	36.2237	45.2949	73.2756	0.566514	0.819817
NM_019070.3	DDX49	1878	2523	1310	30.4331	17.2416	67.1725	34.8775	1.76509	0.819742
XM_002347803.1	LOC100291020	853	316	511	8.39193	14.8073	18.5229	29.9531	0.566744	0.81923
NM_003375.2	VDAC2	1541	1829	950	26.8866	15.2379	59.3446	30.8241	1.76446	0.819224
NM_001083926.1	ASRGL1	2454	1432	744	13.2188	7.49379	29.1769	15.1589	1.76397	0.818826
NM_002222.4	ITPR1	9935	1505	2433	3.43157	6.05309	7.57423	12.2446	0.566912	0.818804
NM_005101.3	ISG15	693	1252	2023	40.9256	72.1549	90.3319	145.96	0.567191	0.818093
NM_003504.3	CDC45L	1962	2872	1493	33.1596	18.8089	73.1906	38.0479	1.76297	0.81801
NM_004987.3	LIMS1	1578	523	845	7.5079	13.2359	16.5716	26.7744	0.567239	0.817972
NM_014905.3	GLS	4402	2523	4076	12.9835	22.8869	28.6574	46.2971	0.567289	0.817845
XM_002344080.1	LOC100289676	842	225	117	6.05333	3.4346	13.361	6.94774	1.76245	0.817585
XM_002344745.1	LOC100291643	842	225	117	6.05333	3.4346	13.361	6.94774	1.76245	0.817585
NM_018638.4	ETNK1	7189	4439	7166	13.9875	24.6383	30.8736	49.84	0.567714	0.816765
NM_014849.3	SV2A	4486	2932	4732	14.8057	26.0728	32.6794	52.7419	0.567859	0.816396
NM_000033.3	ABCD1	3743	481	776	2.91105	5.12442	6.42533	10.366	0.568073	0.815851
NM_015016.1	MAST3	5966	1083	1747	4.11215	7.2379	9.07643	14.6413	0.568142	0.815678
NM_003435.3	ZNF134	2276	496	800	4.93666	8.68802	10.8963	17.5747	0.568215	0.815491
NM_178549.2	ZNF678	2615	578	301	5.00703	2.8451	11.0516	5.75526	1.75988	0.815475
NM_181351.3	NCAM1	6055	1676	873	6.27024	3.56372	13.8398	7.20892	1.75947	0.815137
NM_006815.3	TMED2	2152	7215	3760	75.9483	43.1866	167.635	87.3606	1.75861	0.814435
XM_001134101.1	LOC729898	416	94	49	5.11869	2.91143	11.2981	5.88942	1.75814	0.814048
NM_019045.3	WDR44	4205	656	1057	3.53396	6.21315	7.80024	12.5684	0.568787	0.814039
NM_007271.2	STK38	3637	2672	4304	16.6424	29.2504	36.7336	59.1696	0.568965	0.813589
NM_020347.2	LZTFL1	3440	1375	717	9.05458	5.15186	19.9855	10.4215	1.75754	0.813555
NM_001165895.1	CD320	1171	1490	777	28.8239	16.4009	63.6208	33.1768	1.75746	0.813495
NM_182687.1	PKMYT1	2185	2297	1198	23.8141	13.5522	52.5629	27.4142	1.75722	0.813292
NM_002528.5	NTHL1	1080	667	348	13.9903	7.9645	30.8796	16.1111	1.75658	0.812768
NM_017572.3	MKNK2	1800	1618	2604	20.3625	35.7579	44.9444	72.3333	0.569454	0.812349
NM_181558.2	RFC3	1481	1226	640	18.7525	10.6814	41.391	21.607	1.75562	0.811984
XM_002343495.1	LOC100133337	1290	1176	1892	20.651	36.2522	45.5814	73.3333	0.569649	0.811855
NM_012227.1	GTPBP6	1890	1017	531	12.1894	6.94442	26.9048	14.0476	1.75528	0.811705
NM_018467.3	USE1	887	967	505	24.696	14.0725	54.5096	28.4667	1.75492	0.811401
NM_005751.4	AKAP9	12618	3784	6084	6.79336	11.918	14.9945	24.1084	0.570011	0.810939
NM_001001563.1	TIMM50	2604	2474	1293	21.522	12.2733	47.5038	24.8272	1.75357	0.810292
XR_078707.1	LOC100287551	2221	692	1112	7.058	12.3754	15.5786	25.0338	0.570325	0.810144
XR_079208.1	LOC100290213	2221	692	1112	7.058	12.3754	15.5786	25.0338	0.570325	0.810144
XR_079015.1	LOC100291665	2221	692	1112	7.058	12.3754	15.5786	25.0338	0.570325	0.810144
NM_053002.3	MED12L	7790	3754	1963	10.9164	6.22853	24.095	12.5995	1.75265	0.809537
NM_017647.3	FTSJ3	3630	3371	5414	21.0366	36.865	46.4325	74.573	0.570639	0.80935
NM_002756.3	MAP2K3	2332	1202	1930	11.6762	20.4565	25.7719	41.3808	0.570779	0.808995
XM_002343171.1	LOC100289104	979	152	244	3.5171	6.16042	7.76302	12.4617	0.570919	0.808641
XM_002347308.1	LOC100290846	979	152	244	3.5171	6.16042	7.76302	12.4617	0.570919	0.808641
XM_002344655.1	LOC100293246	979	152	244	3.5171	6.16042	7.76302	12.4617	0.570919	0.808641
NM_006602.2	TCFL5	2504	1244	651	11.2541	6.42613	24.8403	12.9992	1.7513	0.808426
NM_001135765.1	ATP2A2	8351	15494	8109	42.029	24.0011	92.7673	48.5511	1.75113	0.808282
XM_001724664.1	FLJ35946	695	256	134	8.34409	4.76566	18.4173	9.64029	1.75088	0.80808
XR_078643.1	LOC100294182	1238	2401	1257	43.9335	25.0968	96.9709	50.7674	1.75056	0.80782
NM_130851.2	BMP4	1824	260	417	3.22903	5.65086	7.12719	11.4309	0.571424	0.807367
XR_078667.1	LOC729119	622	1126	590	41.0083	23.4458	90.5145	47.4277	1.74907	0.806589
NM_001024732.1	MECR	2464	813	426	7.47436	4.27338	16.4976	8.64448	1.74905	0.806571
NM_001012410.2	SGOL1	2399	1084	568	10.2358	5.85223	22.5927	11.8383	1.74905	0.806571
NM_001067.2	TOP2A	5769	21569	11303	84.6942	48.428	186.939	97.9633	1.74887	0.806422
NM_018245.2	OGDHL	3821	931	1492	5.51946	9.6515	12.1827	19.5237	0.571876	0.806226
NM_144978.1	CCDC138	2223	538	282	5.48235	3.13554	12.1008	6.34278	1.74845	0.80608
NM_130398.2	EXO1	3285	1623	851	11.192	6.4032	24.7032	12.9528	1.74787	0.805601
NM_001135580.1	C19orf71	679	108	173	3.60311	6.29766	7.95287	12.7393	0.572135	0.805572
NM_017848.4	FAM120C	8191	1085	1737	3.00066	5.24162	6.62312	10.6031	0.572468	0.804734
XM_002343786.1	LOC100289671	1637	1702	893	23.5524	13.4836	51.9853	27.2755	1.74674	0.804668
XM_002348109.1	LOC100290335	1637	1702	893	23.5524	13.4836	51.9853	27.2755	1.74674	0.804668
XM_002345490.1	LOC100292375	1637	1702	893	23.5524	13.4836	51.9853	27.2755	1.74674	0.804668
NM_024661.3	CCDC51	1524	486	255	7.22396	4.13579	15.9449	8.36614	1.7467	0.804628
NM_144631.4	ZNF513	2174	473	757	4.92862	8.60675	10.8786	17.4103	0.572646	0.804284
NM_015683.1	ARRDC2	2549	843	1349	7.49172	13.0811	16.5359	26.4614	0.572712	0.804117
NM_032140.1	C16orf48	1648	421	221	5.78694	3.31465	12.7731	6.7051	1.74587	0.803943
XM_001726170.2	LOC729317	1725	1449	761	19.0284	10.9043	42	22.058	1.74504	0.803258
NM_006385.3	ZNF211	2543	469	750	4.17783	7.28984	9.22139	14.7464	0.573103	0.803134
XR_017355.3	LOC644877	969	832	437	19.4502	11.1471	42.9309	22.549	1.74487	0.803119
NM_004840.2	ARHGEF6	5348	10485	16764	44.4121	77.4799	98.0273	156.731	0.573207	0.802871
NM_032340.2	C6orf125	541	923	485	38.6481	22.1589	85.305	44.8244	1.74414	0.802515
NM_213601.1	TMED8	990	869	1389	19.8842	34.6793	43.8889	70.1515	0.573375	0.80245
NM_004091.2	E2F2	5338	3042	1599	12.9094	7.40411	28.4938	14.9775	1.74354	0.802019
NM_005669.4	REEP5	3154	867	1385	6.22704	10.854	13.7445	21.9562	0.573707	0.801613
NM_001545.1	ICT1	899	1046	550	26.357	15.1219	58.1758	30.5895	1.74297	0.801548
NM_024573.1	C6orf211	2604	961	1535	8.36	14.5704	18.4524	29.4739	0.573768	0.801462
NM_000713.2	BLVRB	884	669	352	17.1434	9.84223	37.8394	19.9095	1.74182	0.8006
NM_001080503.2	CCDC159	1093	161	257	3.3368	5.81187	7.36505	11.7566	0.574135	0.800539
NR_003128.1	LOC284441	2073	1109	1770	12.1187	21.1046	26.7487	42.6918	0.574221	0.800321
XM_002343124.1	LOC100287473	657	494	260	17.0328	9.78162	37.5951	19.7869	1.7413	0.800168
XM_002342954.1	LOC100289042	786	190	100	5.47589	3.14471	12.0865	6.36132	1.7413	0.800168
XM_002347075.1	LOC100290574	786	190	100	5.47589	3.14471	12.0865	6.36132	1.7413	0.800168
XM_002346206.1	LOC100292520	786	190	100	5.47589	3.14471	12.0865	6.36132	1.7413	0.800168
NM_001042546.1	ATPAF1	3985	2198	1157	12.4946	7.17642	27.5784	14.5169	1.74107	0.799971
NM_015932.4	POMP	1394	2529	4035	41.097	71.5457	90.7102	144.727	0.574416	0.799833
NM_001949.3	E2F3	5113	1365	2177	6.04757	10.5241	13.3483	21.2889	0.574639	0.799272
NR_024546.1	TXNL1	1451	3049	1606	47.6008	27.3578	105.065	55.3411	1.73993	0.799033
NM_032302.3	PSMG3	1412	1646	867	26.407	15.1771	58.2861	30.7011	1.73993	0.799029
NM_199418.2	PRCP	2251	1511	2409	15.2059	26.4524	33.5629	53.5096	0.574842	0.798762
NM_001146175.1	ZNF414	1431	651	343	10.3054	5.92458	22.7463	11.9846	1.73943	0.798618
NM_001002031.2	ATP5G2	1192	3262	1719	61.9914	35.6453	136.829	72.1057	1.73912	0.798356
XR_015202.2	LOC729494	965	224	357	5.25829	9.14416	11.6062	18.4974	0.575044	0.798257
NM_024617.2	ZCCHC6	5718	1897	3023	7.51532	13.0676	16.588	26.4341	0.575109	0.798093
NM_001145309.1	LRTOMT	3869	1132	597	6.62784	3.81398	14.6291	7.71517	1.73777	0.79724
NM_017653.3	DYM	2660	2863	1510	24.3817	14.0313	53.8158	28.3835	1.73766	0.797148
NM_001101.3	ACTB	1875	82219	130933	993.333	1726.04	2192.51	3491.55	0.575498	0.797116
XR_078637.1	LOC100294153	1238	2275	1200	41.6279	23.9587	91.8821	48.4653	1.73749	0.797001
XM_002344614.1	LOC100293738	657	491	259	16.9293	9.744	37.3668	19.7108	1.73741	0.79694
NM_015393.2	PARM1	5107	1109	585	4.91915	2.83135	10.8576	5.72743	1.73739	0.79692
XM_002342952.1	LOC100288880	643	152	242	5.35497	9.30267	11.8196	18.818	0.575638	0.796767
XM_002347099.1	LOC100289746	643	152	242	5.35497	9.30267	11.8196	18.818	0.575638	0.796767
XM_002346191.1	LOC100291813	643	152	242	5.35497	9.30267	11.8196	18.818	0.575638	0.796767
NM_003189.2	TAL1	5080	13361	21269	59.5798	103.487	131.506	209.341	0.575722	0.796555
NM_153681.2	PIGP	922	633	334	15.5524	8.95403	34.3275	18.1128	1.73691	0.796526
NM_015057.3	MYCBP2	14919	7111	11318	10.7973	18.7514	23.832	37.9315	0.575814	0.796326
NM_001127359.1	PHTF2	2579	524	834	4.60261	7.99315	10.159	16.1691	0.575819	0.796312
XM_001718584.2	LOC100130710	1167	181	288	3.51343	6.09993	7.75493	12.3393	0.57598	0.79591
NM_002025.2	AFF2	13917	7673	12208	12.4895	21.6821	27.567	43.86	0.576025	0.795795
NM_014303.2	PES1	2307	3621	1912	35.5554	20.4853	78.4785	41.4391	1.73565	0.795474
NM_004159.4	PSMB8	1622	2547	4051	35.5715	61.7326	78.5142	124.877	0.576219	0.79531
NR_023392.1	ZNF252	5522	1672	883	6.85905	3.95246	15.1394	7.99529	1.73539	0.795258
NM_001025.4	RPS23	3366	12292	6495	82.7242	47.6945	182.591	96.4795	1.73446	0.794487
NM_001011708.1	OLA1	4308	1179	623	6.19958	3.5745	13.6838	7.23073	1.73439	0.794428
NM_033251.1	RPL13	1312	13356	7058	230.604	132.969	508.994	268.979	1.73427	0.794325
NM_032015.3	RNF26	2838	2899	1532	23.1398	13.3429	51.0747	26.9908	1.73425	0.794308
NM_007243.1	NRM	1450	1703	900	26.6055	15.3418	58.7241	31.0345	1.73418	0.79425
NM_133367.4	PAQR8	4817	896	1424	4.21362	7.30695	9.30039	14.781	0.576659	0.79421
NM_198679.1	RAPGEF1	6281	7485	3956	26.9952	15.5679	59.5845	31.4918	1.73403	0.794129
NM_015599.1	PGM3	2038	683	361	7.59173	4.37831	16.7566	8.85672	1.73394	0.794055
XM_002343236.1	LOC100287644	605	210	111	7.86299	4.53493	17.3554	9.17355	1.73387	0.793998
XM_002344730.1	LOC100293134	605	210	111	7.86299	4.53493	17.3554	9.17355	1.73387	0.793998
NM_133171.3	ELMO2	3729	2036	3235	12.3683	21.443	27.2995	43.3762	0.576799	0.793859
NM_015055.2	SWAP70	4908	1345	711	6.20786	3.5807	13.7021	7.24328	1.7337	0.793853
NM_001001555.2	GRB10	5102	1886	997	8.37385	4.83012	18.4829	9.77068	1.73367	0.793833
NM_024592.3	SRD5A3	2693	1950	1031	16.403	9.46292	36.205	19.1422	1.73339	0.793599
NM_032415.3	CARD11	4426	2710	4305	13.8702	24.0417	30.6146	48.6331	0.576922	0.793552
NM_030915.3	LBH	2992	1395	2216	10.5618	18.3067	23.3122	37.0321	0.576933	0.793524
NM_005726.4	TSFM	2071	730	386	7.98485	4.60692	17.6243	9.31917	1.73323	0.793464
NM_015173.2	TBC1D1	5759	4915	2599	19.3331	11.1548	42.6723	22.5647	1.73316	0.793404
NM_003916.3	AP1S2	2311	488	775	4.78348	8.28905	10.5582	16.7676	0.577084	0.793146
NM_002953.3	RPS6KA1	3238	2954	4691	20.6661	35.809	45.6146	72.4367	0.57712	0.793057
NM_015141.2	GPD1L	4003	1376	728	7.78676	4.4952	17.1871	9.09318	1.73224	0.792639
XM_002342034.1	LOC100287973	878	189	100	4.87631	2.8152	10.7631	5.69476	1.73214	0.792555
XM_002345309.1	LOC100292614	878	189	100	4.87631	2.8152	10.7631	5.69476	1.73214	0.792555
NM_000391.3	TPP1	3584	1593	2528	10.0687	17.4346	22.2238	35.2679	0.57751	0.792081
NM_174887.2	IFT20	1028	525	278	11.5689	6.68428	25.535	13.5214	1.73075	0.791401
NM_003908.3	EIF2S2	2624	1741	922	15.03	8.68501	33.1745	17.5686	1.73057	0.791246
NM_022768.4	RBM15	3493	2484	1316	16.1093	9.31237	35.5568	18.8377	1.72988	0.790674
NM_018393.3	TCP11L1	2852	1491	790	11.8427	6.84669	26.1396	13.8499	1.7297	0.790524
NM_001017964.1	YDJC	1366	1908	1011	31.6411	18.2938	69.8389	37.0059	1.72961	0.790447
NM_003875.2	GMPS	2487	5505	2918	50.1425	29.001	110.676	58.6651	1.72899	0.789931
NM_019107.3	C19orf10	1080	2409	1277	50.5286	29.2261	111.528	59.1204	1.72889	0.789845
NM_017801.2	CMTM6	3426	2285	3619	15.1086	26.1098	33.3479	52.8167	0.578654	0.789228
XM_002343115.1	LOC100287422	1519	3034	1609	45.2462	26.1819	99.8683	52.9625	1.72815	0.789226
NM_017867.2	C4orf27	1248	643	341	11.6713	6.75372	25.7612	13.6619	1.72813	0.789216
NM_005507.2	CFL1	1275	10657	16875	189.343	327.142	417.922	661.765	0.578778	0.788917
XM_002347253.1	LOC100290811	1519	3035	1610	45.2611	26.1982	99.9013	52.9954	1.72764	0.788805
XM_002344590.1	LOC100292480	1519	3035	1610	45.2611	26.1982	99.9013	52.9954	1.72764	0.788805
NM_183425.1	RBM38	2375	2527	3997	24.1027	41.5981	53.2	84.1474	0.579418	0.787323
NM_001017981.1	RNF215	1946	337	533	3.92293	6.76998	8.65879	13.6948	0.57946	0.787218
NM_016277.3	RAB23	3074	740	393	5.45321	3.16003	12.0364	6.39232	1.72568	0.787165
NM_006313.1	USP15	4668	1339	2117	6.49791	11.2097	14.3423	22.6757	0.57967	0.786697
NM_001142935.1	MXD3	2695	1039	552	8.73335	5.06271	19.2764	10.2412	1.72503	0.786624
NM_052865.2	C20orf72	2168	1406	747	14.691	8.51656	32.4262	17.2279	1.72499	0.786585
NM_014737.2	RASSF2	5493	2631	4158	10.8501	18.7102	23.9487	37.8482	0.579906	0.78611
NM_024736.5	GSDMD	1845	1158	1830	14.2179	24.5165	31.3821	49.5935	0.579934	0.78604
NM_006399.3	BATF	964	262	414	6.1567	10.6152	13.5892	21.473	0.579992	0.785895
NM_005875.2	EIF1B	1026	1234	656	27.2453	15.8037	60.1365	31.9688	1.72398	0.785743
NM_153033.2	KCTD7	4907	1341	713	6.19066	3.59151	13.6642	7.26513	1.72369	0.785504
NM_001165414.1	LDHA	2352	8293	4410	79.8727	46.3451	176.297	93.75	1.72343	0.785284
NM_003000.2	SDHB	1175	3065	1630	59.0904	34.2888	130.426	69.3617	1.72331	0.785184
NM_194071.2	CREB3L2	7548	3760	2000	11.2844	6.54939	24.9073	13.2485	1.72297	0.784901
NM_019043.3	APBB1IP	2692	4344	2311	36.5543	21.2191	80.6835	42.9235	1.7227	0.784676
NM_139343.1	BIN1	2669	394	622	3.34404	5.7603	7.38104	11.6523	0.580533	0.78455
NM_173473.2	C10orf104	3317	2924	1556	19.969	11.5949	44.076	23.4549	1.72222	0.78427
NM_133486.1	MBNL3	1594	464	247	6.59407	3.83011	14.5546	7.7478	1.72164	0.783783
NM_173694.3	ATP11C	6211	2179	1160	7.9473	4.61636	17.5415	9.33827	1.72155	0.78371
XM_002346361.1	LOC100294398	694	341	538	11.1306	19.1613	24.5677	38.7608	0.580889	0.783666
NM_018944.2	C21orf45	1606	1170	623	16.5031	9.58839	36.4259	19.396	1.72115	0.783373
NM_004060.3	CCNG1	2515	6201	3302	55.8532	32.452	123.28	65.6461	1.7211	0.78333
NM_002205.2	ITGA5	4320	1197	1888	6.27674	10.8024	13.8542	21.8519	0.58105	0.783267
NM_020317.3	C1orf63	1500	1192	1880	18.0015	30.9792	39.7333	62.6667	0.581085	0.78318
NM_000989.2	RPL30	530	21079	11227	900.945	523.589	1988.58	1059.15	1.72071	0.783003
XM_002345755.1	LOC100293375	822	567	302	15.6255	9.08109	34.4891	18.3698	1.72067	0.782969
NM_001163436.1	TBCK	3404	820	1293	5.45693	9.38884	12.0447	18.9924	0.581214	0.782858
NM_015049.2	TRAK2	6608	1323	2086	4.53538	7.80274	10.0106	15.7839	0.581255	0.782757
NM_015871.4	ZNF593	661	657	350	22.5158	13.0879	49.6974	26.475	1.72036	0.782707
NM_013443.3	ST6GALNAC6	2446	727	1146	6.7329	11.5806	14.861	23.426	0.581394	0.782411
NM_024051.2	GGCT	1200	882	470	16.6499	9.68099	36.75	19.5833	1.71985	0.782287
XR_078645.1	LOC100294217	1233	3075	1639	56.4945	32.8563	124.696	66.4639	1.71944	0.781939
NM_032034.2	SLC4A11	3177	693	1092	4.94129	8.49588	10.9065	17.186	0.58161	0.781877
NM_001237.3	CCNA2	2846	4344	2316	34.5763	20.1144	76.3176	40.6887	1.71899	0.781558
NM_020343.2	RALGAPA2	6365	1495	2355	5.32068	9.14525	11.7439	18.4996	0.581797	0.781413
NM_021214.1	FAM108C1	2438	602	321	5.59354	3.25443	12.3462	6.58326	1.71875	0.781359
NM_145729.2	MRPL24	946	1697	905	40.6364	23.6462	89.6934	47.833	1.71852	0.781166
NM_145058.1	RILPL2	1452	658	1036	10.2656	17.6358	22.6584	35.6749	0.582086	0.780696
NM_001130722.1	AHCYL2	5127	1565	2464	6.91473	11.879	15.2623	24.0296	0.582096	0.780671
NM_022151.4	MOAP1	2465	1405	2212	12.9117	22.1805	28.499	44.8682	0.58212	0.780613
XM_002346863.1	LOC100290443	861	609	325	16.0228	9.33003	35.3659	18.8734	1.71733	0.780171
XM_002345976.1	LOC100291958	861	609	325	16.0228	9.33003	35.3659	18.8734	1.71733	0.780171
NM_152421.3	FAM69B	2363	860	459	8.24439	4.80122	18.1972	9.71223	1.71714	0.780011
XM_002343776.1	LOC100288574	523	341	182	14.7699	8.60147	32.6004	17.3996	1.71713	0.780002
XM_002345485.1	LOC100291817	523	341	182	14.7699	8.60147	32.6004	17.3996	1.71713	0.780002
NM_152914.2	C17orf103	4846	715	1125	3.34231	5.73815	7.37722	11.6075	0.582471	0.779741
NM_004794.2	RAB33A	1142	515	275	10.2156	5.95209	22.5482	12.0403	1.71631	0.77931
NM_001005386.2	ACTR2	3993	3870	6087	21.9551	37.6797	48.4598	76.2209	0.582678	0.779229
NM_182691.1	SRPK2	3783	4496	2401	26.9224	15.6877	59.4237	31.7341	1.71615	0.779175
XM_002347088.1	LOC100291367	1910	689	368	8.17165	4.76231	18.0366	9.63351	1.7159	0.778967
XM_002346198.1	LOC100292161	1910	689	368	8.17165	4.76231	18.0366	9.63351	1.7159	0.778967
NM_006725.3	CD6	3348	1509	2373	10.21	17.5192	22.5358	35.4391	0.582791	0.778951
NM_014957.2	DENND3	5526	966	1519	3.95996	6.79438	8.7405	13.7441	0.582828	0.778858
NM_016174.4	CERCAM	2747	951	508	7.84234	4.57097	17.3098	9.24645	1.71569	0.778786
NM_177405.1	CECR1	3109	1527	2401	11.1261	19.0886	24.5577	38.6137	0.582865	0.778767
NM_020908.1	TLE3	5384	5173	2764	21.7651	12.6893	48.0405	25.6686	1.71524	0.778412
[truncated: 8,376 more rows]
