# Supplementary material
Source: HighWire-hosted journal article supplement (doi:10.1101/rna.032243.112)
Supplement: Supplemental_Tables_24-6.xlsx [file Supplemental_Tables_24-6.xlsx]

## Sheet: Supplemental Table 2
Gene	% Inc - PMA RT-PCR	StDv	% inc +PMA RT-PCR	StDv	RT-PCR Differential	% Inc - PMA Solexa	% Inc + PMA Solexa	Solexa Differential
PMS1	86	2	85	2	-1	100	100	0
WDR67	75	3	73	6	-2	80	80	0
FoxM1	67	1	79	3	12	71	71	0
SFRS8	55	3	52	1	-3	86	87	1
ACTR10	98	1	99	0	1	62	63	1
DGUOK	9	2	9	1	0	66	67	1
PI4KB	6	1	4	1	-2	23	24	1
RNF216	0	0	0	0	0	54	53	-1
MAX	55	4	57	3	2	43	41	-2
C2orf33	14	3	14	1	0	73	76	3
ADAT1	14	1	18	2	4	77	80	3
CD3D	19	3	16	1	-3	78	74	-4

## Sheet: Supplemental Table 4A
Category	p-value	Molecules
Nervous System Development and Function	1.16E-03-4.69E-02	RUNX3,WASF1,NTAN1,FYN,ATF2,SIGIRR
Organ Morphology	1.16E-03-3.42E-02	WASF1,FYN,FBXW8,ATF2,TRPM2
Cell Cycle	3.41E-03-3.42E-02	NCOR2,IVNS1ABP,PPP5C,MFN2,AKAP9,FYN,TOR2A,MAP2K7,ATF2
Cell-To-Cell Signaling and Interaction	3.41E-03-4.37E-02	NCOR2,CMAH,PTPRC,FYN,TRAF3,HYOU1,ATF2,DLG1,MAP3K7
Connective Tissue Development and Function	3.41E-03-3.42E-02	IVNS1ABP,PPP5C,LTBP4,FYN,TOR2A,MAP2K7,ARHGEF7,MAP3K7
Hematological System Development and Function	3.41E-03-4.37E-02	NCOR2,RUNX3,CMAH,NFYA,PTPRC,FYN,TRAF3,HYOU1,DLG1,MAP3K7
Hematopoiesis	3.41E-03-3.42E-02	RUNX3,NFYA,PTPRC,FYN,MAP3K7
Immune Cell Trafficking	3.41E-03-4.37E-02	NCOR2,RUNX3,CMAH,PTPRC,FYN,TRAF3,HYOU1,DLG1,MAP3K7
Inflammatory Response	3.41E-03-4.37E-02	NCOR2,RUNX3,CMAH,PTPRC,FYN,TRAF3,HYOU1,DLG1,MAP3K7
Cancer	6.67E-03-4.37E-02	NCOR2,RUNX3,CCDC88A,FYN,TRAF3,MAP2K7,HYOU1,ATF2,ARMC1
Cellular Growth and Proliferation	6.67E-03-3.42E-02	RUNX3,PTPRC,FYN,MAP2K7,ATF2,ARMC10
Hematological Disease	6.67E-03-3.42E-02	LYPLA2,TRAF3,MAP2K7,ATF2
Immunological Disease	6.67E-03-3.42E-02	LYPLA2,TRAF3,MAP2K7,RFXANK
Skeletal and Muscular System Development and Function	6.67E-03-4.69E-02	ICMT,LUC7L,MFN2,SLMAP,TOR2A,MAP2K7,DLG1,ARHGEF7,MAP3K7,MYL6,P2RX4,COL4A3BP
Tissue Development	6.67E-03-4.69E-02	ICMT,LUC7L,RUNX3,CMAH,PTPRC,FYN,MAP2K7,DLG1,ARHGEF7,MYL6,MAP3K7
Cellular Development	8.17E-03-3.42E-02	RUNX3,NFYA,PTPRC,FYN,ATF2,ARMC10,MAP3K7
Gene Expression	1.09E-02-4.22E-02	IVNS1ABP,C1orf85,ZMIZ2,MAPK11,HDAC10,ARHGEF7,PPP2R5C,BPTF,ARHGEF12,RUNX3,BRD8,ATF2,MAP3K7,EHMT2,NFYA,FYN,PUS1,MBD1,MAP2K7,ZNF496,DUSP22,MYCBP2,ZNF384,NCOR2,PPP5C,C19orf2,MACF1,RFXANK,MED15
Post-Translational Modification	1.21E-02-3.42E-02	EDEM2,ERP29,LTBP4,UGGT1,FYN,MAN1B1
Protein Folding	1.21E-02-1.21E-02	EDEM2,ERP29,LTBP4,UGGT1,MAN1B1
Cell Signaling	1.29E-02-3.61E-02	ICMT,MFN2,UBE2V1,CARD8,PTPRC,RBCK1,FYN,MAP4K2,MAPK11,PPP5C,NT5C2,RFXANK,MAP3K7
Tissue Morphology	1.42E-02-3.42E-02	LTBP4,RUNX3,SLMAP,PTPRC,FYN,ATF2,MYL6,P2RX4,COL4A3BP
Cell Death	1.58E-02-3.42E-02	RUNX3,PTPRC,TRAF3,MAP3K7
Cellular Assembly and Organization	1.59E-02-3.42E-02	ABCD3,CCDC88A,CKB,LRMP,WASF1,FYN,MAP4K2,ARHGEF7,DLG1,AP1G2,MAP3K7
Cellular Function and Maintenance	1.8E-02-3.42E-02	MFN2,CCDC88A,CKB,WASF1,FYN,DLG1,ARHGEF7,SIGIRR,MAP3K7
Behavior	2.18E-02-4.69E-02	NTAN1,FYN,SIGIRR
Carbohydrate Metabolism	2.18E-02-3.42E-02	CMAH,GALT,B3GALNT2,LYPLA2,MAN1B1,MTRR
Reproductive System Disease	2.18E-02-2.18E-02	EHMT2,FBXW8
Cell-mediated Immune Response	2.84E-02-3.42E-02	FYN,DLG1
Molecular Transport	2.84E-02-4.69E-02	ABCD3,SRRM1,NT5C2,ATXN2,GALT,LYPLA2,DMPK,FYN,TRAF3,DLG1,P2RX4
RNA Trafficking	2.84E-02-2.84E-02	SRRM1,ATXN2
© 2000-2011 Ingenuity Systems, Inc. All rights reserved.

## Sheet: Supplemental Table 4B
Ingenuity Canonical Pathways	-log(p-value)	Molecules
Phospholipase C Signaling	2.22E00	PPP1R12A,ARHGEF12,RHOT1,FYN,ATF2,HDAC10,ARHGEF7,MYL6
Cardiomyocyte Differentiation via BMP Receptors	2.18E00	ATF2,MAP3K7
Production of Nitric Oxide and Reactive Oxygen Species in Macrophages	1.87E00	PPP1R12A,RHOT1,MAPK11,MAP2K7,PPP2R5C,MAP3K7
Regulation of Actin-based Motility by Rho	1.8E00	PPP1R12A,WASF1,RHOT1,MYL6
CD40 Signaling	1.74E00	MAPK11,TRAF3,MAP2K7,MAP3K7
April Mediated Signaling	1.73E00	MAPK11,TRAF3,MAP2K7
B Cell Activating Factor Signaling	1.66E00	MAPK11,TRAF3,MAP2K7
NF-κB Signaling	1.64E00	UBE2V1,TRAF3,MAP2K7,SIGIRR,MAP3K7
SAPK/JNK Signaling	1.56E00	MAP4K2,ATF2,MAP2K7,MAP3K7
Role of PKR in Interferon Induction and Antiviral Response	1.54E00	TRAF3,ATF2,MAP3K7
Role of MAPK Signaling in the Pathogenesis of Influenza	1.54E00	MAPK11,ATF2,MAP2K7
RhoA Signaling	1.52E00	PPP1R12A,ARHGEF12,WASF1,MYL6
© 2000-2011 Ingenuity Systems, Inc. All rights reserved.

## Sheet: Supplemental Table 5A
Functional Categories	p-value	Molecules
Inflammatory Response	1.18E-21-3.65E-03	SELL,CD40LG,MBP,CTSW,LTB,TGFBR2,CD28,IFITM2,CD226,KRT1,CD84,GZMA,STAT5A,IL4R,PTPRE,HSH2D,SAMSN1,ITGA6,IER3,LGALS9B,APOBEC3G,IL18BP,SELP,PNP,RARRES3,ITGA1,GPR68,RXRA,TFPI,ADCYAP1 (includes EG:11516),LCP2,TMEM173,TNFSF10,TNFAIP3,LGALS9,ARRB1,TIMP1,GBP2 (includes EG:14469),SEMA4A,HPGDS,SLA2,EPAS1,FLT1,RELB,EGR1,CD69,ALOX5AP,CD58,SLIT2,IL16,CCR4,RETN,GATA3,LGALS1
Cellular Movement	5.7E-14-2.8E-03	CD40LG,SELL,TNFAIP3,LTB,TNFSF10,LGALS9,TGFBR2,CD28,ARRB1,TIMP1,CD226,STAT5A,PIK3C2B,TP53INP1,IL4R,EPAS1,FGFR1,POU4F1,EGR1,RELB,CD69,FLT1,SH2D3C,ITGA6,CD58,ALOX5AP,TRPC6,IER3,SLIT2,IL18BP,IL16,RETN,SELP,CCR4,TGFA,ITGA1,CD82,HHEX,ADCYAP1 (includes EG:11516),TFPI,RXRA,GATA3,LCP2,LGALS1,ETV5
Immune Cell Trafficking	5.7E-14-3.65E-03	CD40LG,SELL,MBP,TNFSF10,LTB,TNFAIP3,LGALS9,TGFBR2,CD28,ARRB1,TIMP1,CD226,SEMA4A,CD84,SLA2,GZMA,STAT5A,PTPRE,IL4R,HSH2D,EPAS1,SAMSN1,RELB,EGR1,FLT1,CD69,SH2D3C,ITGA6,ALOX5AP,CD58,IER3,SLIT2,IL16,IL18BP,CCR4,RETN,SELP,ITGA1,GATA3,ADCYAP1 (includes EG:11516),RXRA,LCP2,LGALS1
Hematological System Development and Function	1.65E-13-3.65E-03	CD40LG,SELL,MBP,ZFP36L1,LTB,HES1 (includes EG:15205),TGFBR2,CD28,CD226,CD84,GZMA,STAT5A,PTPRE,IL4R,TP53INP1,HSH2D,SAMSN1,SH2D3C,ITGA6,IER3,LGALS9B,IL18BP,LST1,SELP,PNP,ITGA1,HHEX,TFPI,RXRA,ADCYAP1 (includes EG:11516),LCP2,TNFSF10,TNFAIP3,LGALS9,CD52,ARRB1,TIMP1,LYL1,SEMA4A,HPGDS,SLA2,EPAS1,FLT1,CD69,EGR1,RELB,CD58,ALOX5AP,SLIT2,IL16,ZFPM2,CCR4,RETN,HLA-E,CD82,GATA3,LGALS1
Cardiovascular System Development and Function	7.36E-12-3.29E-03	CD40LG,SELL,MB,ZFP36L1,TNFSF10,TNFAIP3,SPRY4,TGFBR2,CD28,TIMP1,CASP10,STAT5A,TUBB3,IL4R,EPAS1,ADAMTS1,SPRY1,FGFR1,FLT1,TUBA4A,TRPC6,SLIT2,PLXND1,IL18BP,ZFPM2,SELP,TGFA,ITGA1,HHEX,TFPI,GATA3,LGALS1
Organismal Development	7.36E-12-2.8E-03	MB,ZFP36L1,TNFAIP3,TNFSF10,LTB,HES1 (includes EG:15205),SPRY4,TGFBR2,CD28,TIMP1,FOXB1,KRT1,STAT5A,IL4R,EPAS1,ADAMTS1,SPRY1,POU4F1,RELB,FLT1,FGFR1,EGR1,ITGA6,SLIT2,PLXND1,IL18BP,ZFPM2,SELP,TGFA,ITGA1,HHEX,TFPI,GATA3,ADCYAP1 (includes EG:11516),RXRA,LCP2,LGALS1
Cell-To-Cell Signaling and Interaction	7.64E-12-3.65E-03	CD40LG,SELL,MBP,LTB,HES1 (includes EG:15205),TGFBR2,CD28,CD226,CD84,CASP10,GZMA,STAT5A,IL4R,PTPRE,HSH2D,SAMSN1,FGFR1,ITGA6,SELP,PNP,RARRES3,ITGA1,RXRA,ADCYAP1 (includes EG:11516),TFPI,PARVG,LCP2,TNFAIP3,TNFSF10,LGALS9,CD52,TIMP1,FOXB1,SEMA4A,SLA2,SPRY1,CD69,RELB,FLT1,EGR1,CD58,SLIT2,PLXND1,IL16,RETN,CCR4,TGFA,CD82,GATA3,SIGLEC6,LGALS1
Cellular Growth and Proliferation	6.01E-11-3.65E-03	CD40LG,SGK1,MBP,ZFP36L1,LTB,HES1 (includes EG:15205),TGFBR2,CD28,CD84,STAT5A,TUBB3,IL4R,TP53INP1,PTPRE,HSH2D,ADAMTS1,SAMSN1,POU4F1,FGFR1,SH2D3C,ITGA6,TRPC6,IER3,LST1,SELP,PNP,RARRES3,NEIL1,ITGA1,HHEX,ADCYAP1 (includes EG:11516),RXRA,TFPI,LCP2,ETV5,DUSP6,TNFSF10,TNFAIP3,LGALS9,CD52,COL6A1,TIMP1,HPGD,GBP2 (includes EG:14469),HPGDS,EPAS1,SPRY1,EGR1,CD69,RELB,FLT1,CD58,SLIT2,IL16,RETN,HLA-E,TGFA,CD82…
Tissue Morphology	7.91E-11-3.31E-03	SELL,CD40LG,SGK1,TNFAIP3,TNFSF10,LTB,HES1 (includes EG:15205),TGFBR2,CD28,TIMP1,HPGDS,STAT5A,TUBB3,IL4R,EPAS1,ADAMTS1,SAMSN1,POU4F1,FLT1,CD69,EGR1,RELB,FGFR1,SH2D3C,ITGA6,LGALS9B,IL18BP,SELP,CCR4,PNP,TGFA,RARRES3,ITGA1,GATA3,ADCYAP1 (includes EG:11516),RXRA,LCP2
Cellular Development	1.46E-09-3.35E-03	CD40LG,MBP,LTB,HES1 (includes EG:15205),SPRY4,TGFBR2,CD28,IFITM2,STAT5A,TP53INP1,IL4R,TUBB3,ADAMTS1,FGFR1,POU4F1,ITGA6,TRPC6,IER3,SELP,PNP,RARRES3,ITGA1,HHEX,TFPI,ADCYAP1 (includes EG:11516),RXRA,LCP2,ETV5,MB,NID2,TNFSF10,TNFAIP3,LGALS9,CD52,TIMP1,LYL1,HPGD,SEMA4A,EPAS1,SPRY1,FLT1,CD69,EGR1,RELB,SLIT2,ZFPM2,RETN,TGFA,CD82,GATA3,LGALS1
Dermatological Diseases and Conditions	2.06E-09-3.4E-03	SELL,LAPTM5,SGK1,MBP,LTB,TNFAIP3,TNFSF10,TMC6,CLEC2B,TGFBR2,CD28,CD52,TIMP1,IFITM2,FAR2,GBP2 (includes EG:14469),KRT1,TMC8,TUBB3,IL4R,IER2,RELB,FGFR1,FLT1,EGR1,TUBA4A,ITGA6,ALOX5AP,PLXND1,IL16,SELP,CCR4,HLA-E,TGFA,ITGA1,GATA3,RXRA,LCP2,LGALS1
Inflammatory Disease	2.06E-09-3.4E-03	SELL,CD40LG,SCML1,SGK1,MBP,LTB,TGFBR2,CD28,IFITM2,CD226,KRT1,FAM101B,CASP10,GZMA,TP53INP1,AMPD3,IL4R,TUBB3,ADAMTS1,POU4F1,FGFR1,ITGA6,IL18BP,LST1,SELP,ITGA1,RXRA,LCP2,LAPTM5,TMEM173,TNFAIP3,TNFSF10,CLEC2B,CD52,COL6A1,SLFN5,ARRB1,TIMP1,HPGD,GBP2 (includes EG:14469),SEMA4A,EPAS1,RELB,CD69,FLT1,EGR1,TUBA4A,ALOX5AP,CD58,NMT2,SLIT2,PLXND1,IL16,RETN,CCR4,HLA-E,TGFA,GATA3,LGALS1
Hematopoiesis	1.21E-08-2.59E-03	CD40LG,MBP,TNFAIP3,TNFSF10,LTB,HES1 (includes EG:15205),TGFBR2,CD28,CD52,TIMP1,LYL1,SEMA4A,STAT5A,IL4R,TP53INP1,EPAS1,FLT1,RELB,EGR1,CD69,ZFPM2,SELP,PNP,RARRES3,ITGA1,HHEX,RXRA,ADCYAP1 (includes EG:11516),GATA3,LCP2,LGALS1
Renal and Urological Disease	1.87E-08-3.4E-03	TUBB3,CD40LG,EPAS1,SGK1,SAMSN1,FLT1,FGFR1,TUBA4A,ITGA6,TNFSF10,TNFAIP3,TRPC6,IL16,CD28,COL6A1,SELP,TIMP1,TGFA,ITGA1,CPXM1
Cardiovascular Disease	2.53E-08-9.39E-04	CD40LG,KIAA1462,TNFSF10,TNFAIP3,TGFBR2,CD28,CD52,TIMP1,TOX2,DPF3,STAT5A,PTPRE,TUBB3,EPAS1,MAST4,FLT1,EGR1,TUBA4A,ALOX5AP,HIVEP3,RCBTB2,ZFPM2,SELP,TGFA,RXRA,TFPI,GATA3
Immunological Disease	2.72E-08-3.4E-03	CD40LG,SELL,SCML1,MBP,LTB,TGFBR2,CD28,IFITM2,CD226,KRT1,FAM101B,CASP10,GZMA,TUBB3,AMPD3,IL4R,HSH2D,MAST4,FGFR1,ITGA6,PREX2,IL18BP,LST1,SELP,PNP,ITGA1,RXRA,LCP2,ETV5,LAPTM5,TMEM173,TNFAIP3,TNFSF10,PLCH1,CLEC2B,CD52,SLFN5,ARRB1,TIMP1,SEMA4A,GBP2 (includes EG:14469),HPGDS,DPF3,EPAS1,CD69,TUBA4A,NMT2,SLIT2,PLXND1,IL16,TMEM2,CCR4,HLA-E,TGFA,GATA3,LGALS1
Cancer	2.73E-08-3.58E-03	SELL,CD40LG,SGK1,MBP,LTB,HES1 (includes EG:15205),TGFBR2,CD28,IFITM2,KRT1,CASP10,GZMA,STAT5A,IL4R,PTPRE,TP53INP1,TUBB3,ADAMTS1,SAMSN1,IER2,FGFR1,ITGA6,TRPC6,IER3,APOBEC3G,IL18BP,SELP,PNP,ITGA1,RXRA,TFPI,ETV5,DUSP6,TNFSF10,TNFAIP3,PLCH1,CD52,COL6A1,ARRB1,TIMP1,HPGD,ANTXR2,HPGDS,GBP2 (includes EG:14469),EPAS1,RELB,FLT1,CD69,EGR1,TUBA4A,CD58,SLIT2,KLHL6,IL16,ZFPM2,LPCAT2,RETN,CCR4,HLA-E,TGFA,LIMD2,C…
Cell-mediated Immune Response	5.47E-08-2.59E-03	CD40LG,SELL,MBP,TNFSF10,LTB,TNFAIP3,TGFBR2,CD28,CD52,CD226,SEMA4A,STAT5A,IL4R,CD69,RELB,EGR1,FLT1,ITGA6,IL18BP,IL16,CCR4,SELP,PNP,GATA3,ADCYAP1 (includes EG:11516),LCP2,LGALS1
Cellular Function and Maintenance	5.47E-08-2.59E-03	CD40LG,SGK1,MBP,LTB,TNFAIP3,TNFSF10,HES1 (includes EG:15205),TGFBR2,CD28,CD52,SEMA4A,GZMA,SLA2,STAT5A,PIK3C2B,IL4R,RELB,EGR1,CD69,FLT1,TRPC6,RETN,CCR4,PNP,ADCYAP1 (includes EG:11516),GATA3,LCP2,LGALS1
Lymphoid Tissue Structure and Development	5.47E-08-2.59E-03	CD40LG,MBP,LTB,TNFAIP3,TNFSF10,HES1 (includes EG:15205),TGFBR2,CD28,CD52,TIMP1,SEMA4A,STAT5A,IL4R,FLT1,EGR1,RELB,CD69,SH2D3C,KLHL6,SELP,PNP,ITGA1,TFPI,ADCYAP1 (includes EG:11516),GATA3,LCP2,LGALS1
Neurological Disease	8.72E-08-2.72E-03	SELL,CD40LG,MBP,EGR1,CD58,TNFSF10,IL18BP,CD28,CD52,ARRB1,TIMP1,SEMA4A,LCP2,LGALS1
Hematological Disease	9.44E-08-3.51E-03	SELL,CD40LG,SGK1,LTB,TNFAIP3,TNFSF10,TGFBR2,CD28,CD52,HPGDS,CASP10,STAT5A,TUBB3,CD69,FLT1,FGFR1,EGR1,TUBA4A,ITGA6,CD58,IER3,KLHL6,IL16,PNP,ITGA1,RXRA
Connective Tissue Disorders	1.11E-07-2.32E-03	SCML1,CD40LG,TMEM173,TNFSF10,LTB,TNFAIP3,CLEC2B,CD28,COL6A1,SLFN5,TIMP1,CD226,GBP2 (includes EG:14469),FAM101B,CASP10,GZMA,IL4R,AMPD3,TUBB3,EPAS1,ADAMTS1,POU4F1,CD69,FLT1,FGFR1,TUBA4A,ALOX5AP,NMT2,SLIT2,PLXND1,IL16,IL18BP,LST1,CCR4,SELP,RETN,HLA-E,RXRA,LGALS1
Skeletal and Muscular Disorders	1.11E-07-2.32E-03	SCML1,CD40LG,TMEM173,TNFSF10,LTB,TNFAIP3,CLEC2B,CD28,COL6A1,SLFN5,TIMP1,IFITM2,CD226,GBP2 (includes EG:14469),FAM101B,CASP10,GZMA,IL4R,AMPD3,TUBB3,EPAS1,ADAMTS1,POU4F1,CD69,FLT1,FGFR1,TUBA4A,ALOX5AP,NMT2,SLIT2,PLXND1,IL16,IL18BP,LST1,CCR4,SELP,RETN,HLA-E,RXRA,LGALS1
Cell Death	2.06E-07-3.4E-03	CD40LG,SGK1,MBP,LTB,HES1 (includes EG:15205),TGFBR2,CD28,MICAL1,UBA7,CD226,CASP10,GZMA,STAT5A,IL4R,TP53INP1,TUBB3,PTPRE,HSH2D,POU4F1,FGFR1,ITGA6,IER3,PNP,RARRES3,ITGA1,HHEX,ADCYAP1 (includes EG:11516),RXRA,MB,DUSP6,TMEM173,TNFSF10,TNFAIP3,LGALS9,ARRB1,TIMP1,ANTXR2,FOXB1,HPGDS,HCST,EPAS1,CD69,EGR1,FLT1,RELB,SLIT2,PPP1R16B,HLA-E,TGFA,CD82,GATA3,LGALS1,FAIM3
Tissue Development	2.66E-07-3.6E-03	SELL,CD40LG,SGK1,MBP,ZFP36L1,LTB,HES1 (includes EG:15205),TGFBR2,CD28,CD226,KRT1,STAT5A,IL4R,PTPRE,ADAMTS1,FGFR1,POU4F1,ITGA6,TRPC6,IER3,IL18BP,LST1,SELP,ITGA1,HHEX,PARVG,RXRA,ADCYAP1 (includes EG:11516),TFPI,LCP2,MB,CHST7,NID2,TNFSF10,LGALS9,TIMP1,ANTXR2,FOXB1,SHANK3,EPAS1,SPRY1,FLT1,RELB,EGR1,CD69,HIVEP3,CD58,SLIT2,PLXND1,ZFPM2,CCR4,TGFA,CD82,GATA3,LGALS1
Genetic Disorder	3.34E-07-1.51E-03	CD40LG,SGK1,DUSP6,MBP,TNFSF10,TNFAIP3,HES1 (includes EG:15205),TMC6,CLEC2B,TGFBR2,CD28,CD52,COL6A1,TIMP1,ANTXR2,FAR2,HPGD,GBP2 (includes EG:14469),KRT1,TMC8,CASP10,GZMA,TP53INP1,TUBB3,IL4R,EPAS1,ADAMTS1,IER2,RELB,FGFR1,FLT1,EGR1,ITGA6,TUBA4A,ALOX5AP,IER3,SLIT2,IL16,CCR4,SELP,TGFA,CD82,ITGA1,GATA3,RXRA,LCP2,ETV5,LGALS1
Antigen Presentation	9.91E-07-3.4E-03	CD40LG,SELL,LTB,TNFAIP3,TNFSF10,CD28,ARRB1,TIMP1,CD226,KRT1,GZMA,IL4R,PTPRE,EPAS1,RELB,CD69,FLT1,ITGA6,CD58,SLIT2,IL16,RETN,ITGA1,LCP2,LGALS1
Gastrointestinal Disease	1.71E-06-3.58E-03	CD40LG,SGK1,DUSP6,LTB,TNFSF10,LGALS9,TGFBR2,COL6A1,TIMP1,IFITM2,HPGD,CASP10,STAT5A,TP53INP1,TUBB3,IL4R,EPAS1,ADAMTS1,RELB,EGR1,CD69,FGFR1,FLT1,TUBA4A,ITGA6,CD58,SLIT2,LPCAT2,RETN,HLA-E,TGFA,ITGA1,CD82,TFPI,RXRA,PCBP3,LGALS1,ETV5
Hepatic System Disease	1.71E-06-1.57E-03	CD40LG,TUBB3,IL4R,EPAS1,EGR1,FGFR1,FLT1,TUBA4A,ITGA6,LTB,TNFSF10,LGALS9,TGFBR2,TIMP1,TGFA,RXRA,PCBP3
Lipid Metabolism	3.42E-06-3.4E-03	CD40LG,SGK1,HCAR1,MBP,TNFSF10,GBP5,CD28,TIMP1,HPGD,FAR2,HPGDS,STAT5A,PIK3C2B,IL4R,EGR1,FLT1,ITGA6,ALOX5AP,SLCO2A1,IL16,IL18BP,LPCAT2,RETN,TGFA,CD82,ADCYAP1 (includes EG:11516),RXRA,TFPI,LGALS1
Small Molecule Biochemistry	3.42E-06-3.4E-03	CD40LG,MB,SGK1,HCAR1,MBP,TNFSF10,TNFAIP3,GBP5,CD28,ARRB1,TIMP1,HPGD,FAR2,HPGDS,PIK3C2B,STAT5A,IL4R,FLT1,EGR1,ITGA6,ALOX5AP,SLCO2A1,IL16,IL18BP,LPCAT2,RETN,TGFA,CD82,TFPI,RXRA,ADCYAP1 (includes EG:11516),GPR68,LGALS1
Humoral Immune Response	3.82E-06-2.96E-03	STAT5A,CD40LG,TP53INP1,IL4R,HSH2D,SAMSN1,RELB,FLT1,CD69,EGR1,SH2D3C,LTB,KLHL6,TGFBR2,CD28,LYL1,PNP,HHEX,KRT1,LGALS1
Molecular Transport	7.55E-06-3.04E-03	SELL,CD40LG,SGK1,HCAR1,MBP,TNFSF10,GBP5,CD28,ARRB1,TIMP1,HPGD,HPGDS,SLA2,PIK3C2B,IL4R,EGR1,ALOX5AP,TRPC6,IL16,IL18BP,RETN,SELP,CCR4,TGFA,GPR68,ADCYAP1 (includes EG:11516),RXRA,TFPI,LCP2,LGALS1
Skeletal and Muscular System Development and Function	1.09E-05-2.22E-03	TGFBR2,RETN,TIMP1,FLT1,FGFR1,ITGA6,TNFSF10,TNFAIP3,TRPC6,RXRA,TFPI
Respiratory Disease	1.23E-05-6.66E-04	SELL,TUBB3,EPAS1,EGR1,DUSP6,FLT1,FGFR1,TUBA4A,HES1 (includes EG:15205),SLIT2,TGFBR2,IL16,SELP,TIMP1,TGFA,HPGD,ITGA1,RXRA,CASP10
Organismal Injury and Abnormalities	1.86E-05-1.81E-03	SELL,IL4R,CD40LG,EPAS1,MB,FLT1,FGFR1,EGR1,TNFAIP3,LTB,TNFSF10,TGFBR2,SELP,TIMP1,TGFA,LCP2
Reproductive System Disease	3.5E-05-3.4E-03	CD40LG,SELL,SGK1,MBP,TGFBR2,CD52,COL6A1,TIMP1,IFITM2,ANTXR2,GBP2 (includes EG:14469),KRT1,CASP10,GZMA,TP53INP1,TUBB3,PTPRE,IER2,FGFR1,FLT1,RELB,EGR1,CD69,ITGA6,TUBA4A,IER3,SLIT2,APOBEC3G,ZFPM2,LPCAT2,CCR4,TGFA,ITGA1,CD82,RXRA,GATA3,ETV5
Reproductive System Development and Function	4.16E-05-1.41E-03	TGFBR2,STAT5A,TIMP1,FLT1,EGR1,HPGD,TGFA,FOXB1,HES1 (includes EG:15205),ADCYAP1 (includes EG:11516)
Gene Expression	9.82E-05-3.65E-03	CD40LG,IL4R,EPAS1,RELB,EGR1,TNFAIP3,IER3,CD28,TGFA,GBP2 (includes EG:14469),ADCYAP1 (includes EG:11516),RXRA,GATA3,LCP2,LGALS1
Drug Metabolism	1.4E-04-3.8E-04	IL18BP,CD40LG,TGFA,HPGD,TNFSF10,SLCO2A1,HPGDS
Infectious Disease	1.85E-04-2.32E-03	CD40LG,SGK1,CTSW,TNFSF10,TNFAIP3,TMC6,CLEC2B,CD28,UBA7,IFITM2,HPGD,ANTXR2,TMC8,GZMA,EPAS1,FGFR1,RELB,CD58,BZRAP1,ALOX5AP,APOBEC3G,IL16,RETN,RARRES3,RXRA
Embryonic Development	2.1E-04-2.22E-03	MB,LTB,HES1 (includes EG:15205),TGFBR2,TIMP1,FOXB1,KRT1,STAT5A,EPAS1,ADAMTS1,SPRY1,POU4F1,RELB,FLT1,FGFR1,EGR1,ITGA6,SLIT2,IL18BP,ZFPM2,SELP,TGFA,ITGA1,HHEX,GATA3,ADCYAP1 (includes EG:11516),RXRA,LCP2
Organ Development	2.1E-04-2.59E-03	MB,LTB,HES1 (includes EG:15205),TGFBR2,TIMP1,FOXB1,SEMA4A,KRT1,STAT5A,EPAS1,ADAMTS1,SPRY1,RELB,FLT1,FGFR1,EGR1,ITGA6,SLIT2,IL18BP,ZFPM2,SELP,TGFA,ITGA1,HHEX,GATA3,ADCYAP1 (includes EG:11516),RXRA,LCP2
Cell Signaling	2.19E-04-3.35E-03	SLA2,PIK3C2B,CD40LG,SELL,MB,SAMSN1,FGFR1,MBP,ITGA6,TNFSF10,TNFAIP3,TRPC6,IL16,CD28,SELP,CCR4,TGFA,ADCYAP1 (includes EG:11516),LCP2,LGALS1
Vitamin and Mineral Metabolism	2.19E-04-1.12E-03	SLA2,PIK3C2B,SELL,MBP,TRPC6,IL16,CD28,SELP,CCR4,TGFA,ADCYAP1 (includes EG:11516),LCP2,LGALS1
Carbohydrate Metabolism	2.42E-04-2.8E-03	CD28,CD40LG,ARRB1,LPCAT2,FLT1,TGFA,GPR68,ADCYAP1 (includes EG:11516),LGALS1
Cell Cycle	3.8E-04-3.65E-03	STAT5A,CD28,CD40LG,IL4R,TNFSF10,LGALS1
Cell Morphology	3.8E-04-3.29E-03	PTPRE,CD40LG,FLT1,EGR1,ITGA6,TNFSF10,TGFBR2,CD28,TGFA,RARRES3,CD82,RXRA,GATA3,LCP2
Energy Production	3.8E-04-3.8E-04	HPGD,SLCO2A1
Hair and Skin Development and Function	3.8E-04-2.8E-03	TGFBR2,PIK3C2B,SELL,MB,TIMP1,SH2D3C,TGFA,ITGA1,SEMA4A
Nervous System Development and Function	3.8E-04-3.31E-03	PTPRE,MBP,POU4F1,FGFR1,EGR1,ITGA6,SLIT2,HES1 (includes EG:15205),ARRB1,CCR4,TGFA,FOXB1,ADCYAP1 (includes EG:11516),GATA3
Tumor Morphology	4.39E-04-2.8E-03	SELL,FLT1,FGFR1,ITGA6,SLIT2,TGFBR2,IL18BP,TIMP1,TGFA,ITGA1,ADCYAP1 (includes EG:11516),TFPI,LGALS1
Cellular Compromise	5.64E-04-2.8E-03	CD28,SELL,CD40LG,SLIT2,TFPI,ADCYAP1 (includes EG:11516)
Free Radical Scavenging	6.83E-04-2.28E-03	GZMA,CD28,CD40LG,CD52,EPAS1,SELP,TGFA,ITGA1,ADCYAP1 (includes EG:11516),LCP2
Hepatic System Development and Function	9.67E-04-2.22E-03	TGFBR2,TIMP1,FLT1,TGFA,LTB,HHEX,LGALS1
Developmental Disorder	1.12E-03-1.12E-03	TGFA,KRT1
Endocrine System Development and Function	1.12E-03-1.12E-03	EGR1,HES1 (includes EG:15205)
Hypersensitivity Response	1.12E-03-2.28E-03	IL16,PTPRE,SELL,SELP,CD226,LCP2
Organismal Survival	1.63E-03-1.63E-03	STAT5A,IL4R,CD40LG,FLT1,POU4F1,PNP,ANTXR2,TNFSF10,ITGA1,ADCYAP1 (includes EG:11516),TFPI,LGALS1
Renal and Urological System Development and Function	1.81E-03-2.03E-03	CD28,ADAMTS1,TIMP1,SPRY1,FGFR1,SLIT2,GATA3,PLXND1
Cellular Assembly and Organization	2.22E-03-2.22E-03	PTPRE,MBP
Digestive System Development and Function	2.22E-03-2.22E-03	FGFR1,ITGA6
Organ Morphology	2.22E-03-2.55E-03	TGFBR2,TIMP1,FGFR1,ITGA6,PNP,TGFA,ALOX5AP
Protein Synthesis	2.22E-03-2.22E-03	CD28,CD40LG
Post-Translational Modification	3.35E-03-3.35E-03	CD28,SELL,SAMSN1,FGFR1,ITGA6,LGALS1
Metabolic Disease	3.37E-03-3.37E-03	SELL,CD40LG,TNFSF10,HES1 (includes EG:15205),CLEC2B,PLCH1,TGFBR2,CD28,CD52,TIMP1,GBP2 (includes EG:14469),HPGDS,CASP10,DPF3,PTPRE,TUBB3,EPAS1,HSH2D,MAST4,SAMSN1,CD69,FGFR1,TUBA4A,BZRAP1,HIVEP3,PREX2,NMT2,LST1,TMEM2,SELP,RETN,TGFA,ADCYAP1 (includes EG:11516),PCBP3
© 2000-2011 Ingenuity Systems, Inc. All rights reserved.

## Sheet: Supplemental Table 5B
Functional Categories	p-value	Molecules
Nervous System Development and Function	6.74E-07-1.09E-02	GAB2,SLIT1,SLC6A9 (includes EG:116509),EPHB2,ATF5,POU3F2,SH3GL2,IRX5,PDGFC,EIF4EBP1,VEGFA,MYC,SLC23A1,GFRA1,MAL,PHGDH,NOTCH3,CXCR4,HERPUD1,S1PR3,ARHGEF10,CBS,GNAO1,RAG1,ARPP21,SYNGR1
Cellular Development	1.72E-06-1.09E-02	TEAD4,GAB2,DDIT3,SLIT1,EPHB2,ATF5,POU3F2,IRX5,PDGFC,EIF4EBP1,CD1D,VEGFA,MYC,GFRA1,RAG2,MAL,LONP1,RIPK4,NOTCH3,CXCR4,TRIB3,S1PR3,GNAO1,TSHR,RAG1,ARPP21
Inflammatory Response	2.18E-06-1.09E-02	GAB2,CXCR4,ASS1,EPHX2,CD1B,ULBP1,DNTT,CD1E,PDGFC,TUB,EIF4EBP1,CD1D,VEGFA,S1PR3,MYC,CBS,RAG2,GNAO1,ANXA3,TSHR,RAG1,CST7
Cellular Movement	4.94E-06-1.09E-02	GAB2,SLIT1,EPHB2,CXCR4,POU3F2,HSPA5,CD1D,VEGFA,MYC,S1PR3,LGMN,PTPRU,GFRA1,ANXA3,GNAO1,TSHR,RAG1
Tissue Development	7.87E-06-1.09E-02	GAS2 (includes EG:14453),TEAD4,GAB2,SLIT1,EPHB2,POU3F2,IRX5,PDGFC,CD1D,EIF4EBP1,MYC,VEGFA,SLC23A1,GFRA1,MAL,RAG2,PHGDH,RIPK4,NOTCH3,CXCR4,TRIB3,S1PR3,ARHGEF10,CBS,KHDRBS3,TSHR,RAG1,AARS
Cardiovascular Disease	1.18E-05-1.09E-02	GAB2,RASL10B,DDIT3,CXCR4,EPHX2,SNTB1,SH3GL2,PDGFC,TUB,EIF4EBP1,MYC,VEGFA,PTPRU,MGAT4A,LGMN,CBS,GFRA1,GNAO1,RAG2,PHGDH,RAG1,KIAA0226L,PMEPA1
Hematopoiesis	1.2E-05-1.09E-02	MYC,VEGFA,GAB2,CXCR4,RAG2,TSHR,RAG1,LONP1,CD1D
Organismal Injury and Abnormalities	1.2E-05-1.09E-02	MYC,VEGFA,SLC7A11,SLC23A1,DDIT3,CBS,EPHX2,RAG2,MAL,GNAO1,TSHR,RAG1
Cell Death	2.63E-05-1.09E-02	GAS2 (includes EG:14453),GAB2,SLC7A11,DDIT3,EPHB2,ATF5,SH3GL2,HSPA5,CD1D,EIF4EBP1,MYC,VEGFA,LGMN,GFRA1,MAL,RAG2,EEF1E1,CXCR4,ULBP1,HERPUD1,TRIB3,TUB,S1PR3,MZB1,GNAO1,RAG1,AARS,PMEPA1
Cell-mediated Immune Response	4.22E-05-1.09E-02	CXCR4,RAG2,RAG1,LONP1,CD1D
Cellular Function and Maintenance	4.22E-05-1.09E-02	GAB2,NOTCH3,DDIT3,EPHB2,CXCR4,HERPUD1,TRIB3,HSPA5,TUB,CD1D,GLRB,VEGFA,S1PR3,MYC,ANXA3,RAG2,RAG1,AARS,LONP1
Hematological System Development and Function	4.22E-05-1.09E-02	GAB2,NOTCH3,DDIT3,CXCR4,ULBP1,HSPA5,PDGFC,CD1D,S1PR3,VEGFA,MYC,CBS,GNAO1,RAG2,TSHR,RAG1,LONP1
Lymphoid Tissue Structure and Development	4.22E-05-1.09E-02	MYC,VEGFA,GAB2,EPHB2,CXCR4,RAG2,RAG1,LONP1
Embryonic Development	6.15E-05-1.09E-02	RIPK4,NOTCH3,SLIT1,EPHB2,CXCR4,POU3F2,IRX5,PDGFC,MYC,S1PR3,VEGFA,SLC23A1,CBS,GFRA1,RAG2,KHDRBS3,PHGDH,RAG1,AARS
Organ Development	6.15E-05-1.09E-02	RIPK4,NOTCH3,SLIT1,EPHB2,CXCR4,POU3F2,IRX5,PDGFC,MYC,S1PR3,VEGFA,SLC23A1,CBS,GFRA1,RAG2,KHDRBS3,PHGDH,RAG1,AARS
Organismal Development	6.15E-05-1.09E-02	TEAD4,RIPK4,NOTCH3,SLIT1,CXCR4,EPHB2,EPHX2,POU3F2,IRX5,PDGFC,VEGFA,S1PR3,MYC,LGMN,SLC23A1,CBS,GFRA1,KHDRBS3,ANXA3,RAG2,TSHR,PHGDH,RAG1,AARS
Hair and Skin Development and Function	8.11E-05-1.09E-02	RIPK4,VEGFA,MYC,SLC7A11,GFRA1,POU3F2,AARS
Cardiovascular System Development and Function	9.98E-05-1.09E-02	TEAD4,MYC,S1PR3,VEGFA,NOTCH3,CBS,SLIT1,EPHB2,CXCR4,EPHX2,ANXA3,PDGFC
Cell Morphology	9.98E-05-1.09E-02	GAB2,SLIT1,DDIT3,SLC6A9 (includes EG:116509),CXCR4,EPHB2,TRIB3,EIF4EBP1,VEGFA,S1PR3,MYC,CBS,GFRA1,MAL
Cellular Growth and Proliferation	1.17E-04-1.09E-02	TEAD4,GAB2,SLC7A11,DDIT3,EPHB2,EPHX2,POU3F2,HSPA5,IRX5,PDGFC,EIF4EBP1,CD1D,MYC,VEGFA,LGMN,STC2,GFRA1,RAG2,EEF1E1,NOTCH3,CXCR4,ULBP1,S1PR3,PTPRU,GNAO1,RNF187,TSHR,RAG1
Connective Tissue Disorders	1.17E-04-1.09E-02	VEGFA,GAB2,RAG2,RAG1
DNA Replication, Recombination, and Repair	1.17E-04-1.09E-02	MYC,RAG2,RAG1
Genetic Disorder	1.17E-04-1.09E-02	GAB2,SLC7A11,DDIT3,EPHB2,ASS1,EPHX2,HSPA5,EIF4EBP1,GLRB,VEGFA,MYC,LGMN,GFRA1,MAL,RAG2,PHGDH,PSAT1,NOTCH3,CXCR4,HERPUD1,DAAM2,GPT2 (includes EG:108682),TUB,ARHGEF10,GNAO1,TSHR,RAG1,ARPP21,SYNGR1
Hematological Disease	1.17E-04-1.09E-02	MYC,VEGFA,CXCR4,ANXA3,RAG2,RAG1,HSPA5
Immunological Disease	1.17E-04-1.09E-02	VEGFA,MYC,GAB2,LGMN,CXCR4,ANXA3,RAG2,PHGDH,RAG1,HSPA5,CD1D
Infectious Disease	1.17E-04-1.09E-02	VEGFA,CXCR4,RAG2,RAG1,CD1D,EIF4EBP1
Inflammatory Disease	1.17E-04-1.09E-02	VEGFA,LGMN,CXCR4,RAG2,PHGDH,RAG1,CD1D
Skeletal and Muscular Disorders	1.17E-04-1.09E-02	PSAT1,GAB2,DDIT3,EPHB2,EPHX2,DAAM2,HERPUD1,SH3GL2,CD1E,C16orf74,HSPA5,S1PR3,GLRB,VEGFA,ARHGEF10,RAG2,GNAO1,RAG1,ARPP21
Skeletal and Muscular System Development and Function	1.17E-04-1.09E-02	MYC,TEAD4,VEGFA,GAB2,LGMN,CBS,CXCR4,TSHR,TRIB3,PDGFC
Tissue Morphology	1.39E-04-1.09E-02	GAB2,NOTCH3,DDIT3,EPHB2,CXCR4,EPHX2,PDGFC,CD1D,EIF4EBP1,MYC,VEGFA,S1PR3,LGMN,CBS,GFRA1,RAG2,GNAO1,MTHFD2,RAG1
Amino Acid Metabolism	2.19E-04-1.09E-02	SLC7A11,CBS,SLC6A9 (includes EG:116509),ASS1,PHGDH,MTHFD2,PYCR1
Small Molecule Biochemistry	2.19E-04-1.09E-02	SLC7A11,SLC6A9 (includes EG:116509),CXCR4,ASS1,EPHX2,CD1B,TRIB3,CD1D,MYC,S1PR3,VEGFA,CBS,RAG2,MZB1,TSHR,MTHFD2,PHGDH,PYCR1
Humoral Immune Response	2.5E-04-1.09E-02	S1PR3,VEGFA,MYC,CXCR4,RAG2,TSHR,RAG1
Cancer	2.55E-04-1.09E-02	TEAD4,MYO7B,SLC7A11,DDIT3,ATF5,EPHB2,ASS1,HSPA5,PDGFC,EIF4EBP1,CD1D,MYC,VEGFA,NEIL3,GFRA1,RAG2,MAL,MTHFD2,PHGDH,EEF1E1,TFDP2,LONP1,PSAT1,NOTCH3,CXCR4,MFAP4,SDF2L1,ANXA3,RNF187,KHDRBS3,TSHR,RAG1,CST7,CEP70,SYNGR1
Cell Signaling	5.15E-04-1.05E-02	GAB2,EPHB2,CXCR4,ASS1,HERPUD1,HSPA5,VEGFA,S1PR3,MYC,GFRA1,GNAO1,MZB1,RAG2,TSHR
Connective Tissue Development and Function	6E-04-1.09E-02	MYC,VEGFA,TEAD4,GAB2,LGMN,CBS,CXCR4,TSHR,TRIB3,PDGFC
Immune Cell Trafficking	6.29E-04-1.09E-02	MYC,VEGFA,S1PR3,GAB2,CBS,CXCR4,GNAO1,ULBP1,TSHR,CD1D
Cell Cycle	6.93E-04-1.09E-02	VEGFA,MYC,DDIT3,ATF5
Cellular Assembly and Organization	6.93E-04-1.09E-02	MYC,VEGFA,SLIT1,CXCR4,EPHB2,GFRA1,GNAO1,POU3F2,SYNGR1,HSPA5,EIF4EBP1
Lipid Metabolism	6.93E-04-1.09E-02	MYC,S1PR3,VEGFA,CBS,EPHX2,CD1B,TRIB3,CD1D
Neurological Disease	6.93E-04-1.09E-02	GAB2,SLC7A11,DDIT3,EPHB2,EPHX2,SH3GL2,CD1E,HSPA5,PDGFC,EIF4EBP1,CD1D,MYC,VEGFA,GLRB,GFRA1,RAG2,MAL,PHGDH,PSAT1,CXCR4,HERPUD1,DAAM2,C16orf74,S1PR3,OGN,ARHGEF10,CBS,KHDRBS3,GNAO1,RAG1,ARPP21,SYNGR1
Tumor Morphology	6.93E-04-1.09E-02	MYC,VEGFA,CXCR4,GFRA1,ANXA3,POU3F2,EIF4EBP1
Cellular Compromise	9.03E-04-1.09E-02	VEGFA,MYC,DDIT3,HSPA5,EIF4EBP1
Molecular Transport	1.04E-03-1.09E-02	GAB2,SLC7A11,DDIT3,SLC6A9 (includes EG:116509),EPHB2,CXCR4,HERPUD1,HSPA5,VEGFA,S1PR3,MYC,CBS,GNAO1,TSHR
Vitamin and Mineral Metabolism	1.04E-03-8.44E-03	MYC,S1PR3,VEGFA,GAB2,CXCR4,EPHB2,GNAO1,TSHR,HERPUD1,HSPA5
Hepatic System Development and Function	1.15E-03-1.09E-02	MYC,VEGFA,CBS,MTHFD2
Visual System Development and Function	1.15E-03-1.09E-02	VEGFA,PDGFC
Organismal Survival	1.62E-03-1.62E-03	SLC6A9 (includes EG:116509),EPHB2,CXCR4,PDGFC,MYC,VEGFA,S1PR3,CBS,MAL,RAG2,TSHR,PHGDH,MTHFD2,EEF1E1,RAG1
Cell-To-Cell Signaling and Interaction	1.71E-03-1.09E-02	GAS2 (includes EG:14453),MYC,VEGFA,GAB2,CXCR4,GFRA1,ULBP1,TSHR,PDGFC,CD1D
Nucleic Acid Metabolism	2.06E-03-1.09E-02	CBS,CXCR4,MZB1,TSHR
Antigen Presentation	2.38E-03-1.09E-02	VEGFA,CBS,ULBP1,TSHR,CD1D
Respiratory Disease	2.41E-03-1.09E-02	VEGFA,CXCR4,CD1D
Post-Translational Modification	3.02E-03-1.09E-02	MYC,VEGFA,DDIT3,HERPUD1
Dermatological Diseases and Conditions	3.15E-03-1.09E-02	MYC,VEGFA,LGMN,CXCR4,PHGDH,RAG1,CD1D,EIF4EBP1
Developmental Disorder	3.15E-03-1.09E-02	VEGFA,GFRA1,ASS1,PHGDH,TSHR,EIF4EBP1
Reproductive System Disease	3.15E-03-1.09E-02	VEGFA,LGMN,NOTCH3,MTHFD2,PMEPA1
Nutritional Disease	3.17E-03-3.17E-03	MYC,VEGFA,GPT2 (includes EG:108682),TUB,EIF4EBP1
Endocrine System Disorders	4.09E-03-1.09E-02	MYC,DDIT3,TSHR,TRIB3
Metabolic Disease	4.09E-03-1.09E-02	RIPK4,SLC7A11,DDIT3,EPHB2,ASS1,SNTB1,TRIB3,SH3TC1,SH3GL2,PDGFC,TUB,CD1D,EIF4EBP1,MYC,VEGFA,LGMN,MZB1,RAG2,KHDRBS3,TSHR,PHGDH,KIAA0226L
Organ Morphology	4.49E-03-1.09E-02	VEGFA,MYC,NOTCH3,GFRA1,MZB1,GNAO1,RAG1,IRX5
Gene Expression	6.05E-03-6.05E-03	DDIT3,TRIB3
Protein Synthesis	6.24E-03-6.24E-03	MYC,VEGFA,CBS,CXCR4,RAG2,HSPA5,EIF4EBP1
Gastrointestinal Disease	6.46E-03-1.09E-02	TEAD4,MYO7B,SLC7A11,ATF5,EPHB2,CXCR4,HSPA5,PDGFC,VEGFA,MYC,SDF2L1,NEIL3,GFRA1,MAL,PHGDH,RAG1,TFDP2
Hepatic System Disease	6.46E-03-1.09E-02	MYC,VEGFA,NEIL3,ATF5,PHGDH,RAG1,HSPA5,PDGFC
Psychological Disorders	8.06E-03-8.06E-03	GLRB,SLC7A11,ARHGEF10,GFRA1,MAL,DAAM2,SYNGR1
Endocrine System Development and Function	8.46E-03-1.09E-02	MYC,CXCR4,POU3F2
Behavior	1.06E-02-1.09E-02	GLRB,VEGFA,EPHB2,GFRA1,GNAO1,RAG1
Antimicrobial Response	1.09E-02-1.09E-02	CD1D
Auditory and Vestibular System Development and Function	1.09E-02-1.09E-02	VEGFA,EPHB2
Carbohydrate Metabolism	1.09E-02-1.09E-02	CD1D
Digestive System Development and Function	1.09E-02-1.09E-02	MYC,GFRA1
Drug Metabolism	1.09E-02-1.09E-02	CBS
Ophthalmic Disease	1.09E-02-1.09E-02	VEGFA
Organismal Functions	1.09E-02-1.09E-02	MYC,VEGFA
Protein Folding	1.09E-02-1.09E-02	VEGFA
Protein Trafficking	1.09E-02-1.09E-02	DDIT3
Renal and Urological Disease	1.09E-02-1.09E-02	MYC,VEGFA
Reproductive System Development and Function	1.09E-02-1.09E-02	MYC,TSHR,POU3F2
Respiratory System Development and Function	1.09E-02-1.09E-02	VEGFA,NOTCH3
© 2000-2011 Ingenuity Systems, Inc. All rights reserved.

## Sheet: Supplemental Table 5C
Ingenuity Canonical Pathways	-log(p-value)	Molecules
Crosstalk between Dendritic Cells and Natural Killer Cells	5.99	CD28,CD40LG,HLA-E,CD69,CD226,LTB,TNFSF10
Hepatic Fibrosis / Hepatic Stellate Cell Activation	5.31	TGFBR2,CD40LG,IL4R,TIMP1,FLT1,FGFR1,TGFA
T Helper Cell Differentiation	4.86	TGFBR2,CD28,CD40LG,IL4R,GATA3
Altered T Cell and B Cell Signaling in Rheumatoid Arthritis	4.06	CD28,CD40LG,RELB,LTB
NF-κB Signaling	3.52	TGFBR2,PIK3C2B,CD40LG,FLT1,FGFR1,RELB,TGFA,TNFAIP3
Allograft Rejection Signaling	2.85	CD28,CD40LG,HLA-E
Autoimmune Thyroid Disease Signaling	2.85	CD28,CD40LG,HLA-E
Communication between Innate and Adaptive Immune Cells	2.85	CD28,CD40LG,HLA-E
Dendritic Cell Maturation	2.21	PIK3C2B,CD40LG,RELB,LTB,CD58
Role of Tissue Factor in Cancer	2.15	PIK3C2B,STAT5A,ARRB1,EGR1,ITGA6
G-Protein Coupled Receptor Signaling	1.87	PIK3C2B,LPAR6,CCR4,GPR84,HCAR1,DUSP6,GPR68
Graft-versus-Host Disease Signaling	1.81	CD28,HLA-E
Extrinsic Prothrombin Activation Pathway	1.71	TFPI
Eicosanoid Signaling	1.66	ALOX5AP,HPGDS
Role of JAK1 and JAK3 in γc Cytokine Signaling	1.66	PIK3C2B,STAT5A,IL4R
© 2000-2011 Ingenuity Systems, Inc. All rights reserved.

## Sheet: Supplemental Table 5D
Ingenuity Canonical Pathways	-log(p-value)	Molecules
B Cell Development	4.61	RAG2,DNTT,RAG1
Alanine and Aspartate Metabolism	2.78	ASS1,AARS,GPT2 (includes EG:108682)
Bladder Cancer Signaling	2.67	VEGFA,MYC,PDGFC
Ephrin Receptor Signaling	2.44	VEGFA,EPHB2,CXCR4,GNAO1,PDGFC
Glycine, Serine and Threonine Metabolism	2.2	PSAT1,CBS,PHGDH
Lipid Antigen Presentation by CD1	2.01	CD1B,CD1D
Axonal Guidance Signaling	1.93	VEGFA,SLIT1,EPHB2,CXCR4,GNAO1,PDGFC
Atherosclerosis Signaling	1.8	CXCR4,PDGFC
Clathrin-mediated Endocytosis Signaling	1.72	VEGFA,EPHB2,SH3GL2,PDGFC
Urea Cycle and Metabolism of Amino Groups	1.71	ASS1,PYCR1
Primary Immunodeficiency Signaling	1.67	RAG2,RAG1
© 2000-2011 Ingenuity Systems, Inc. All rights reserved.

## Sheet: Supplemental Table 6
Gene	Forward Primer	Reverse Primer	Tm	Sizes
SLMAP	GACACAGACTGTACTCTCAGAACTG	GCCAGAGCTTCTCCATGAGAGC	65	210/300
FAM36A	GTGGAGTCGCGGAGTAGTCCTCATGG	CAGCATCCCAAAGTCACCAAGATAAACCCTCC	70	120/240
CELF2	CTGCAGATAGTGAAAAGTCCAACGCTGTGG	CCCAGGTGGCAGTGTTGAGCTGCTGC	70	280/360
TRAF3	CACGAAGACACCGACTGTCCCTGC	CGAGCGAGTTGCTCCACTCCTTCAGC	70	170/250
BRD8	GCAAACATCCGAGTCTGGGATCAGTGC	CCTCTTCTGTAACTTCCACCTCTGGAACTGG 70	70	240/290
NGLY1	GAAGCAGGGTGAAGTCAGTAAGGCA	CACACGCCATTCTCCCATCCAGAAAT	65	250/430
ZC3H14	GCAGAAGTGGTCCAGGGACAAAGTAGG	GACTCTTGGTTTGGTGCCACTACTACTTCC	70	200/280
SEC16A	GATGGCCTCCTCGCTCTCTCATCCC	GCCAGCTGAGCAGGGTTGTAGAAGG	70	200/260/280
PPP1R12A	CCAAGCACCACATCAACACCAACAG	GCAAGACAATCTAGAAGATCAACACAG	65	210/400
MACF1	GTCTACTAGATGACTGGGCAAGTAAGGG	GAACCTCCTCCATTCTGTTGAGGATAGCC	70	23/290
REPS1	CCAGGTGAGGTAGGTTATTCAGGCTCTCC	GCTTGGAGTCATACGAATGGGAACTGG	70	160/240
AKAP9	CAACCACAGCAGATGACTGCAGTTCAGAG	GTCCCATAGGTAACCCTCATTTCTTCCAGC	70	180/240
CD45-E6	GGCAAGCCCAACACCTTCCCCCACTG	CTGAAACTTTTCAA CCCCTGGTGGCAC	70	500/650
H2AFY	GTTGATGTCACTTGGCGATATTCCTG	ACTTCCAAGGGCCCGTTCTTTTTCC	70	190/280
TRIM26	GGATTCGCGGCCCGGAGCTCGG	GCCACAGTCAATGGTCACAGGGTCC	70	180/290
EHMT2	CGGGGTACCAGTGGTTCCAGTGGCCGGCG	AGATCTAAGCTTCTCTCCGTCCACACTCTCAGTGG	65	210/310
DDHD1	GAAGCCAGTTGCCTCACCTTCTGCTACC	GGGCAACATCCAAGGATGACCAATAGGC	70	190/270
MAP4K2	GGGAGATGTCAAACTGGCTGACTTTGGG	GCCAGTTTGAGAAAGTGGTGGAAATTCTGGGTCC	70	180/310
TIR8	GCCGACCTCTTGGTGAACCTGAGCC	GGTCCTTGTCGTCCTGCAGCTGCG	70	205/360
LUC7L	CTGCCTGAGAGAAGTCGTCGCG	CCCATGACATCCTGGCTGGGACG	70	230/300
CD45-E4	GGCAAGCCCAACACCTTCCCCCACTG	CTGAAACTTTTCAA CCCCTGGTGGCAC	70	650/850
PIGQ	GATCCATCTGCTCGTGGACCTCATCAACTC	GTAGGTGTGCACCACGCGGCTGTAGG	65	130/190
CD45-E5	GGCAAGCCCAACACCTTCCCCCACTG	CTGAAACTTTTCAACCCCTGGTGGCAC	70	370/510
MAP2K7	CGACCTCAACCTGGATATCAGCC	GGAGCTCTCTGAGGATGGCGAGC	65	100/150
CARD8	GATACAGTAAAGACATAAATACCACATTTGACAAATGG	GATAGTTGACACTCAGGAACAGCACGG	65	210/360
Fyn	GTCTCTGCTGCCGCCTAGTAGTTCCC	CACCACTGCATAGAGCTGGACCAGC	70	140/160
ZNF384	CAGAGTCCAAGTCAGACCAGCTGACC	GGAAGAGCTGAGACAATCATGGGAGCC	70	210/260
ERP29	CTTCCTGCTCCTCTCCGCTCCGCATG	CGCTGGATGGCTCCAACCTTAACTGC	70	240/380
TRIM65	GAAGAGGGGAGCCACCCTGG	GGCCCCGGGACTGACGACAG	65	150/210
CKB	CAGCAGCTCATCGACGACCACTTCC	GAGGATGTAGCCCAGGTGAGGGTTCC	70	170/300
FAM21C	CCAATCCACTGCCGATATCTTTGGTGACG	GAGCTTGCCAGGCAGCAGAGACGC	70	180/270
UGCGL1	CTATCTTGGATTCCCAAGGCAAGACTGCTGC	CATACAGTAACTGCCGTCCAGAAGGGC	70	140/170
MAP7D1	CATCCAACGGTCAGTGAAGAAGACGTGG	GACTCCGAGCAAGGAAGGAGAGAGTGG	70	200/310
FIP1L1	GAGGTCGAGCGCCTAGTGTCGGAG	GCGATGATGATGAAGATGATGTTCATGTCAC	65	210/300
LRRC28	CTTTGTAAGACGATCTCTGTGGCAAGGC	GGAACCACAACTATGTTATTTGAGTGCAGG	65	180/220
MYL6	GTGACTTCACCGAAGACCAGACCGC	GTGACAAGAACATGCCGGATTTCAGCACC	70	200/310
CCDC14	GCTGAAACTGTACACGGGCTTGATGG	GAGTCTGCACGTGCTCACAGAGGG	70	220/340
GALT	CCATGACCCTCTCAACCCTCTGTGTCC	CTGCACCCAAGGGTACTGGGCACC	70	180/260
MAP3K7	CTCCCGTGGGAGCAGTGTGGAGAGC	GTTACAGTCAAGTCTTGGATGGATCTACG	70	140/220
ATF2	TGTGGAATATGAGTGATGACAAACC	TTCATTCTCAAATGGACTCGCCAAC	65	140/170
ARMC10	GCTATTATTCGTGAATTGGGTGGTATTCCAATTGTTGC	GGCACGGAGAAGTCCTTCTGTCATGG	70	210/390
FAM33A	CCAGAAAGCTGAGTCTGATCTGGATTAC	GTGAAATTTGAATTGCTCTGCCGCAG	70	160/290
SFRS8	CATCGTCCAGTAAGACCGTCCCGGACG	GACACTGAAAGGACTCTCCTCAATTTTCCCAGC	70	250/480
ACTR10	CGCGTACTTGCTTTGTAAGTGATCTGAAGCG	CTGCAAGCAATCTGTGGAGAAATCCTGGC	70	180/250
CD3D	GACCTGGCTTTATCTACTGGATGAGTTCCG	CTGATAGACCTGGTCATTCCTCAACAGAGC	70	135/350
FoxM1	CTCCATCCGCCACAACCTTTCCCTGC	GGGAGTTCGGTTTTGATGGTCATGTTCCG	70	190/220
RNF216	CAGATGGTCACCATGTTTAGATATTAGCAGTCCC	GTCTCATCTTGGCTGGCCAGCAGAC	70	230/360
C2orf33	CTCTCAGCCAACCACCTCTGAGAGC	GAGGGGTTGTAGGAGGTCTTTCTAAATCCAG	70	250/470
WDR67	GCTCTTGCAAAAGAAATGCGAGCAGATGC	CTTTATGACATGGATTTTCAGCATGTTCTACAGCC	70	260/460
DGUOK	CCGAAGGCTCTCCATCGAAGGCAAC	CTCTCTCATGAGGTCTTCTTGTTTGGTTACTTCC	70	130/250
ADAT1	GACAAAGGAAGTTGTGTCAATGGGAACAGG	GGTCTCGTCTAAGTTTCCACACTCC	65	170/290
PI4KB	GAAGCGCAGGCGGCCAATGGAACC	CAGAAGTGGGCTCAGAAGTTGGCTTCAAGG	70	210/340
